# Supplementary material for: Randomised phase II trial of CAPTEM or FOLFIRI as SEcond-line therapy in NEuroendocrine CArcinomas and exploratory analysis of predictive role of PET/CT imaging and biological markers (SENECA trial): a study protocol
Source: PubMed Central journal article supplement — BMJ Open. 2020 Jul 19;10(7):e034393. doi: 10.1136/bmjopen-2019-034393 (PMC7371236; doi:10.1136/bmjopen-2019-034393), 2020-07-19
Supplement: bmjopen-2019-034393.draft_revisions.pdf [file bmjopen-2019-034393.draft_revisions.pdf]

# BMJ Open

BMJ Open is committed to open peer review. As part of this commitment we make the peer review history of every article we publish publicly available.

When an article is published we post the peer reviewers' comments and the authors' responses online. We also post the versions of the paper that were used during peer review. These are the versions that the peer review comments apply to.

The versions of the paper that follow are the versions that were submitted during the peer review process. They are not the versions of record or the final published versions. They should not be cited or distributed as the published version of this manuscript.

BMJ Open is an open access journal and the full, final, typeset and author-corrected version of record of the manuscript is available on our site with no access controls, subscription charges or pay-per-view fees (<http://bmjopen.bmj.com>).

If you have any questions on BMJ Open's open peer review process please email [info.bmjopen@bmj.com](mailto:info.bmjopen@bmj.com)

# BMJ Open

## Randomized Phase II Trial of CAPTEM or FOLFIRI as Second-line Therapy in Neuroendocrine Carcinomas and Exploratory Analysis of Predictive Role of PET/CT Imaging and Biological Markers (SENECA Study)

|                               |                                                                                                                                                                                                                                                                                                                                                                                                                                                                                                                                                                                                                                                                                                                                                                                                                                                                                                                                                                                                                                                                                                                                                                                                                                                                                                                                                                          |
|-------------------------------|--------------------------------------------------------------------------------------------------------------------------------------------------------------------------------------------------------------------------------------------------------------------------------------------------------------------------------------------------------------------------------------------------------------------------------------------------------------------------------------------------------------------------------------------------------------------------------------------------------------------------------------------------------------------------------------------------------------------------------------------------------------------------------------------------------------------------------------------------------------------------------------------------------------------------------------------------------------------------------------------------------------------------------------------------------------------------------------------------------------------------------------------------------------------------------------------------------------------------------------------------------------------------------------------------------------------------------------------------------------------------|
| Journal:                      | <i>BMJ Open</i>                                                                                                                                                                                                                                                                                                                                                                                                                                                                                                                                                                                                                                                                                                                                                                                                                                                                                                                                                                                                                                                                                                                                                                                                                                                                                                                                                          |
| Manuscript ID                 | bmjopen-2019-034393                                                                                                                                                                                                                                                                                                                                                                                                                                                                                                                                                                                                                                                                                                                                                                                                                                                                                                                                                                                                                                                                                                                                                                                                                                                                                                                                                      |
| Article Type:                 | Protocol                                                                                                                                                                                                                                                                                                                                                                                                                                                                                                                                                                                                                                                                                                                                                                                                                                                                                                                                                                                                                                                                                                                                                                                                                                                                                                                                                                 |
| Date Submitted by the Author: | 18-Sep-2019                                                                                                                                                                                                                                                                                                                                                                                                                                                                                                                                                                                                                                                                                                                                                                                                                                                                                                                                                                                                                                                                                                                                                                                                                                                                                                                                                              |
| Complete List of Authors:     | <p>Bongiovanni, Alberto; Istituto Scientifico Romagnolo per lo Studio e la Cura dei Tumori Srl, Osteoncology and Rare Tumor Center<br/> Liverani, Chiara; Istituto Scientifico Romagnolo per lo Studio e la Cura dei Tumori Srl, Osteoncology and Rare Tumor Center<br/> Pusceddu, Sara; Fondazione IRCCS Istituto Nazionale dei Tumori<br/> Leo, Silvana; ospedale civico<br/> Di Meglio, Giovanni; Bolzano Hospital<br/> Tamberi, Stefano; Medical Oncology, Ospedale degli Infermi, Faenza<br/> Santini, Daniele<br/> Gelsomino, Fabio; Azienda Ospedaliero-Universitaria di Modena<br/> Pucci, Francesca; Azienda Ospedaliero-Universitaria di Parma<br/> Berardi, Rossana; AOU-Ospedali Riuniti Umberto I - G.M. Lancisi - G. Salesi<br/> Lolli, Ivan; Istituto Nazionale di Ricovero e Cura a Carattere Scientifico Saverio de Bellis, ; IRCCS "Saverio de Bellis"<br/> Bergamo, Francesca; IOV IRCCS<br/> Ricci, Sergio; Pisa University Hospital<br/> Foca, Flavia; IRCCS Istituto Scientifico Romagnolo per lo Studio e la Cura dei Tumori, Biostatistics and Clinical Trials Unit Meldola, FC, IT<br/> Severi, Stefano; Nuclear Medicine Unit Istituto Scientifico Romagnolo per lo Studio e la Cura dei Tumori (IRST) IRCCS<br/> Ibrahim, Toni; Istituto Scientifico Romagnolo per lo Studio e la Cura dei Tumori Srl, Osteoncology and Rare Tumor Center</p> |
| Keywords:                     | CAPTEM, neuroendocrine carcinoma, FOLFIRI, capecitabine, temozolomide, second-line                                                                                                                                                                                                                                                                                                                                                                                                                                                                                                                                                                                                                                                                                                                                                                                                                                                                                                                                                                                                                                                                                                                                                                                                                                                                                       |
|                               |                                                                                                                                                                                                                                                                                                                                                                                                                                                                                                                                                                                                                                                                                                                                                                                                                                                                                                                                                                                                                                                                                                                                                                                                                                                                                                                                                                          |

SCHOLARONE™  
Manuscripts

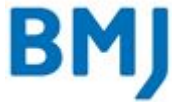

I, the Submitting Author has the right to grant and does grant on behalf of all authors of the Work (as defined in the below author licence), an exclusive licence and/or a non-exclusive licence for contributions from authors who are: i) UK Crown employees; ii) where BMJ has agreed a CC-BY licence shall apply, and/or iii) in accordance with the terms applicable for US Federal Government officers or employees acting as part of their official duties; on a worldwide, perpetual, irrevocable, royalty-free basis to BMJ Publishing Group Ltd ("BMJ") its licensees and where the relevant Journal is co-owned by BMJ to the co-owners of the Journal, to publish the Work in this journal and any other BMJ products and to exploit all rights, as set out in our [licence](#).

The Submitting Author accepts and understands that any supply made under these terms is made by BMJ to the Submitting Author unless you are acting as an employee on behalf of your employer or a postgraduate student of an affiliated institution which is paying any applicable article publishing charge ("APC") for Open Access articles. Where the Submitting Author wishes to make the Work available on an Open Access basis (and intends to pay the relevant APC), the terms of reuse of such Open Access shall be governed by a Creative Commons licence – details of these licences and which [Creative Commons](#) licence will apply to this Work are set out in our licence referred to above.

Other than as permitted in any relevant BMJ Author's Self Archiving Policies, I confirm this Work has not been accepted for publication elsewhere, is not being considered for publication elsewhere and does not duplicate material already published. I confirm all authors consent to publication of this Work and authorise the granting of this licence.

1  
2  
3  
4 1 **CLINICAL STUDY PROTOCOL**  
5

6 2

7  
8  
9 3 **Randomized Phase II Trial of CAPTEM or FOLFIRI as**  
10  
11 4 **SEcond-line Therapy in NEuroendocrine CARcinomas and**  
12  
13 5 **Exploratory Analysis of Predictive Role of PET/CT Imaging**  
14  
15 6 **and Biological Markers (SENECA Study)**  
16

17 7 **Running title: Second-line CAPTEM/FOLFIRI in NECs**  
18

19 8

20  
21  
22 9 *Alberto Bongiovanni<sup>1\*</sup>, Chiara Liverani<sup>1</sup>, Sara Pusceddu<sup>2</sup>, Silvana Leo<sup>3</sup>, Giovanni Di*  
23  
24 10 *Meglio<sup>4</sup>, Stefano Tamberi<sup>5</sup>, Daniele Santini<sup>6</sup>, Fabio Gelsomino<sup>7</sup>, Francesca Pucci<sup>8</sup>,*  
25  
26 11 *Rossana Berardi<sup>9</sup>, Ivan Lolli<sup>10</sup>, Francesca Bergamo<sup>11</sup>, Sergio Ricci<sup>12</sup>, Flavia Foca<sup>13</sup>*  
27  
28 12 *Stefano Severi<sup>14</sup> and Toni Ibrahim<sup>1</sup> and the SENECA Study Team Investigators\**  
29

30  
31 13

32  
33 14 *<sup>1</sup>Osteoncology and Rare Tumors Center, Istituto Scientifico Romagnolo per lo Studio e*  
34  
35 15 *la Cura dei Tumori (IRST) IRCCS, Meldola, Italy, <sup>2</sup>Istituto Nazionale Tumori Milano*  
36  
37 16 *IRCCS, Milan, Italy, <sup>3</sup>Oncology Unit, Ospedale Civico, Lecce, Italy, <sup>4</sup>Onocology Unit,*  
38  
39 17 *Ospedale di Bolzano, Bolzano, Italy, <sup>5</sup>Medical Oncology, Ospedale degli Infermi,*  
40  
41 18 *Faenza, Italy, <sup>6</sup>Università Campus Bio-Medico, Roma, Italy, <sup>7</sup>Azienda Ospedaliera-*  
42  
43 19 *Universitaria di Modena, Modena, Italy, <sup>8</sup>Azienda Ospedaliera-Universitaria di Parma,*  
44  
45 20 *Parma, Italy, <sup>9</sup>AOU-Ospedali Riuniti Umberto I - G.M. Lancisi - G. Salesi, Ancona,*  
46  
47 21 *Italy, <sup>10</sup>IRCCS "Saverio De Bellis", Castellana Grotte, Italy, <sup>11</sup>Istituto Oncologico*  
48  
49 22 *Veneto (IOV), Padua, Italy, <sup>12</sup>Ospedale S. Chiara - AOU Pisana, Pisa, Italy, <sup>13</sup>Unit of*  
50  
51 23 *Biostatistics and Clinical Trials, Istituto Scientifico Romagnolo per lo Studio e la Cura*  
52  
53 24 *dei Tumori (IRST) IRCCS, Meldola, Italy, <sup>14</sup>Nuclear Medicine Unit Istituto Scientifico*  
54  
55 25 *Romagnolo per lo Studio e la Cura dei Tumori (IRST) IRCCS, Meldola, Italy*  
56  
57  
58  
59  
60

1  
2  
3  
4  
5  
6  
7  
8  
9  
10  
11  
12  
13  
14  
15  
16  
17  
18  
19  
20  
21  
22  
23  
24  
25  
26  
27  
28  
29  
30  
31  
32  
33  
34  
35  
36  
37  
38  
39  
40  
41  
42  
43  
44  
45  
46  
47  
48  
49  
50  
51  
52  
53  
54  
55  
56  
57  
58  
59  
60

26

27 **\*Correspondence:** Alberto Bongiovanni, MD

28 Osteoncology and Rare Tumors Center, Istituto Scientifico Romagnolo per lo Studio e

29 la Cura dei Tumori (IRST) IRCCS, Via Piero Maroncelli 40, 47014 Meldola (FC), Italy

30 Tel.: +39-0543-739100; Fax: +39-0543-739123

31 E-mail: [alberto.bongiovanni@irst.emr.it](mailto:alberto.bongiovanni@irst.emr.it)

32

33 **Language style:** This article is formatted in British English.

34

35

36

37

38

39

40

41

42

43

44

1  
2  
3  
4  
5  
6  
7  
8  
9  
10  
11  
12  
13  
14  
15  
16  
17  
18  
19  
20  
21  
22  
23  
24  
25  
26  
27  
28  
29  
30  
31  
32  
33  
34  
35  
36  
37  
38  
39  
40  
41  
42  
43  
44  
45  
46  
47  
48  
49  
50  
51  
52  
53  
54  
55  
56  
57  
58  
59  
60

## 45 Abstract

46 **Introduction:** Patients with metastatic or locally advanced, non-resectable, grade 3  
47 poorly-differentiated gastroenteropancreatic (GEP) and lung neuroendocrine carcinomas  
48 (NECs) are usually treated with in first-line platinum-compounds. There is no standard  
49 second-line treatment upon progression. Accurate biomarkers are needed to facilitate  
50 NEC patients diagnosis and prognostic.

51 **Methods and Analysis:** The SENECA (SEcond-line therapy in NEuroendocrine  
52 CArcinomas) study is a randomized, non-comparative, multicentre phase II trial  
53 designed to evaluate the efficacy and safety of folinic acid, 5-fluorouracil and irinotecan  
54 (FOLFIRI) or capecitabine plus temozolomide (CAPTEM) regimens after failure of  
55 first-line-chemotherapy in lung and GEP-NECs patients. Secondary aims are to  
56 correlate the serum miRNA profile and primary mutational status of MEN1, DAXX,  
57 ATRX and RB-1 with prognosis and outcome and to investigate the prognostic and  
58 predictive role of Ki-67 score and FDG- or <sup>68</sup>Ga-PET/CT.

59 The main eligibility criteria are age  $\geq 18$  years; metastatic or locally advanced, non-  
60 resectable, grade 3 lung or GEP-NECs; progression to first-line platinum-based  
61 chemotherapy. A Bryant and Day design taking into account treatment activity and  
62 toxicity was used to estimate the sample size. All analysis will be performed separately  
63 for each group. A total of 112 patients (56/arm) will be randomly assigned (1:1) to  
64 receive FOLFIRI every 14 days or CAPTEM every 28 days until disease progression or  
65 unacceptable toxicity or for a maximum of six months . Patients undergo testing for  
66 specific biomarkers in primary tumor tissue and for miRNA in blood samples.  
67 MiRNA profile will be performed on the first 20 patients who agree to participate in the  
68 biological sub-study.

1  
2  
3  
4 69 **Ethics and dissemination:** Seneca trial , supported by IRST, was authorized by the  
5  
6 70 locals Ethics Committee and the Italian Medicines Agency (AIFA). Results will be  
7  
8 71 widely disseminated via peer-reviewed manuscripts, conference presentations and  
9  
10 72 reports to relevant authorities.  
11  
12  
13  
14 73

15 74 The study is currently open in Italy. Clinical trial registration: NCT03387592.  
16  
17  
18 75

19  
20 76 **Keywords:** neuroendocrine carcinoma, second-line, FOLFIRI, capecitabine,  
21  
22 77 temozolomide, CAPTEM  
23  
24

#### 25 78 **Strengths and limitations of the study**

- 26  
27 79 • the SENECA trial randomizes patients to receive two different treatments,  
28  
29 80 FOLFIRI or CAPTEM, providing important information on the activity of both  
30  
31 81 combinations in different NEC subtypes (NET G3 and NEC G3).  
32  
33  
34 82 • The SENECA trial analyzes the role of miRNAs and other biological markers  
35  
36 83 as prognostic and predictive factors. A further aim is to assess <sup>68</sup>Ga-PET/CT as  
37  
38 84 a tool to improve current histological classification.

39  
40  
41 85 The major limitation of the study are:

- 42  
43 86 • The rarity of disease and patient's prognosis. However the involvement of  
44  
45 87 several centers along the Italian Country try to overcome this problem.  
46  
47  
48 88 • Poor prognosis of NEC patients. Patients progressed to platinum chemotherapy  
49  
50 89 usually have a rapidly worsening clinical conditions  
51  
52

53 90  
54  
55  
56  
57  
58  
59  
60

## 91 **Introduction**

92 Poorly differentiated neuroendocrine carcinomas (NECs) are very rare malignancies,  
93 representing only 5%-10% of neuroendocrine neoplasias (NENs) (1-3). At the time of  
94 diagnosis, patients are generally in poor conditions due to aggressive and diffuse  
95 disease. These tumors are characterized by aggressive histological features (high Ki-67  
96 index, extensive necrosis, and nuclear atypia) and are classified as grade (G)3 NECs  
97 according to the 2010 World Health Organization (WHO) classification (4). The 2017  
98 WHO classification recognized a further group called G3 NETs as having intermediate  
99 features between NETs and NECs (5).

100 An etoposide-platinum combination is the gold standard for treatment of G3 NECs,  
101 several studies published in the 1990s reporting substantial antitumor activity and high  
102 response rates (41%-67%). However, prognosis is poor with a median progression-free  
103 survival of 9 months and a median overall survival of 15-19 months. When progression  
104 occurs after first-line chemotherapy, the disease is usually very aggressive and patients  
105 succumb rapidly (6).

106 Given the rarity of this disease, prospective clinical data are lacking and treatment  
107 recommendation are essentially expert-based opinions. At present, 2 phase II studies  
108 investigating the second-line treatment of GEP-NECs are registered at  
109 ClinicalTrials.gov, one focusing on the safety and tolerability of everolimus (National  
110 Clinical Trial identifier NCT02113800) and the other investigating the efficacy of  
111 avelumab (NCT03147404). A French study focusing on the identification of predictive  
112 molecular markers of response to sunitinib in GEP-NECs (NCT01215578) has now  
113 closed recruitment and results are eagerly awaited. Another French multicentre  
114 prospective phase II trial is currently ongoing to investigate the efficacy of the



1  
2  
3  
4 115 bevacizumab-FOLFIRI combination after progression on platinum-etoposide (7).

5  
6 116 Different second-line chemotherapy combinations have been evaluated but shown  
7  
8  
9 117 poor results (6, 8, 9). In a monocenter retrospective clinical trial, Hentic et al.  
10  
11 118 hypothesized the potential efficacy of FOLFIRI as second-line chemotherapy in  
12  
13 119 patients with G3 extra-pulmonary NECs (10). An objective response rate was obtained  
14  
15 120 in 31% of patients, with a disease control rate (DCR) of 62%. Median progression-free  
16  
17 121 survival (PFS) and overall survival (OS) were 4 and 18 months, respectively.

18  
19  
20 122 In another retrospective study, a 71% DCR was obtained with temozolomide-based  
21  
22 123 chemotherapy. A PFS of 12 months (95% CI, 5.5- 24) and OS of 22 months (95% CI,  
23  
24 124 12-31) was reported in patients who responded to treatment or showed stable disease  
25  
26 125 (SD), whereas OS was only 8 months (95% CI, 0-8) in non-responders. The authors  
27  
28 126 observed a higher response rate in patients with Ki-67  $\leq$  60%. There were also more  
29  
30 127 responders in the group with high uptake in somatostatin receptor scintigraphy (SRS)  
31  
32 128 and in those with positive staining for chromogranin A (CgA). Both factors are often  
33  
34 129 associated with more differentiated tumors (11).

35  
36  
37  
38 130 Literature data on lung NECs in progression after first-line chemotherapy are based  
39  
40 131 on small patient series (12). Moreover, there is increasing evidence of some  
41  
42 132 discrepancies in the current grading of NECs, highlighting the need for more accurate  
43  
44 133 biomarkers (4, 5). Recent research has shown that NECs may, in fact, comprise 2  
45  
46 134 distinct subgroups with different pathogenesis, *i.e.* a highly proliferative group derived  
47  
48 135 from well differentiated neuroendocrine tumors (NETs) and characterized by mutations  
49  
50 136 in MEN1, DAXX and ATRX, and a poorly differentiated group derived from  
51  
52 137 neuroendocrine-differentiated adenocarcinomas and characterized by a mutation in  
53  
54 138 RB1. Both subgroups display a distinct prognosis and different sensitivity to  
55  
56  
57  
58  
59  
60

1  
2  
3  
4 139 chemotherapy (13-15). Micro(mi)RNAs are a class of small, non-coding, highly  
5  
6 140 conserved single-stranded RNAs involved in the post-transcriptional regulation of cell  
7  
8  
9 141 proliferation, differentiation, survival, and apoptosis (16). They are often associated  
10  
11 142 with resistance to therapy (17, 18). Whilst miRNAs are known to show a specific  
12  
13 143 expression pattern in NETs (19), little is known about differential miRNA profiles in  
14  
15 144 NEC patients. At present, no data are available on the deregulation of specific miRNAs  
16  
17  
18 145 in this setting.

19  
20 146 In a study recently published by our group on GEP-NEC patients undergoing  
21  
22 147 first-line platinum-based chemotherapy, median PFS was 19.3 months and 6.3 months  
23  
24 148 ( $p < 0.01$ ) in patients with Ki-67%  $< 50\%$  or  $> 50\%$ , respectively (19). Median (m)OS  
25  
26 149 was 8.1 months in the latter group but was not reached in the former group ( $p = 0.039$ ).  
27  
28 150 Patients with a positive  $^{68}\text{Ga}$ -PET/CT had a longer OS than those with a negative scan  
29  
30 151 (75% vs. 34.3%, respectively, at 18 months), but the difference was not significant ( $p =$   
31  
32 152 0.06). Our data highlighted that  $^{68}\text{Ga}$ -PET/CT positivity may be a discriminating factor  
33  
34 153 (20,15) in predicting prognosis, especially important in the metastatic setting where  
35  
36 154 histological material is not always available for evaluation. Also  $^{18}\text{F}$ fluorodeoxyglucose  
37  
38 155 ( $^{18}\text{F}$ FDG)-PET/CT could be useful to discriminate patients with different prognosis. (21)  
39  
40

41 156 Given the above premises, we decided to investigate the efficacy and safety of  
42  
43 157 second-line FOLFIRI or CAPTEM in patients with GEP and lung NECs in progression  
44  
45 158 after first-line platinum-based treatment. We also aimed to study the serum miRNA  
46  
47 159 profile in relation to the primary mutational status of MEN1, DAXX, ATRX and RB-1,  
48  
49 160 patient prognosis and response to therapy, and to assess the prognostic and predictive  
50  
51 161 role of  $^{18}\text{F}$ FDG-PET/CT,  $^{68}\text{Ga}$ -PET/CT and Ki-67 score.  
52  
53  
54  
55  
56  
57  
58  
59  
60

1  
2  
3  
4  
5 163  
67 164 **Methods and Analysis**  
89  
10 165  
1112 166  
1314 167 **Study design**  
15

16  
17 168 The SENECA study is a multicentre randomised non-comparative phase II study  
18  
19 169 (Figure 1). Patients with metastatic neuroendocrine carcinomas of different origin  
20  
21 170 (lung or gastroenteropancreatic) in progression after first-line treatment are randomized  
22  
23  
24 171 to receive FOLFIRI every 14 days for a maximum of 12 cycles or until progression or  
25  
26 172 unacceptable toxicity, or CAPTEM every 28 days for a maximum of 6 cycles or until  
27  
28 173 progression or unacceptable toxicity.

29  
30 174 The treatments arms are as follows:  
31

32  
33 175  
3435 176 **FOLFIRI regimen**  
36

- 37  
38 177 • Irinotecan 180 mg/m<sup>2</sup>, given as a 60-min. intravenous (i.v.) infusion on day 1 every  
39  
40 178 2 weeks followed by  
41  
42 179 • Leucovorin 200 mg/m<sup>2</sup>, given as a 2-h i.v. infusion on day 1 every 2 weeks followed  
43  
44 180 by  
45  
46 181 • 5-fluorouracil (5-FU) 400 mg/m<sup>2</sup> given as bolus, and then 5-FU 2400 mg/m<sup>2</sup> given  
47  
48 182 as a 48-h continuous infusion on day 1, every 2 weeks, until progression or for a  
49  
50 183 maximum of 12 cycles.  
51

52  
53  
54 18455  
56 185 **CAPTEM regimen**  
57  
58  
59  
60

1  
2  
3  
4 186 Capecitabine 750 mg/m<sup>2</sup> twice a day on days 1-14 in combination with temozolomide  
5  
6 187 200 mg/m<sup>2</sup> daily on days 10-14, every 4 weeks, until progression or for a maximum of  
7  
8  
9 188 6 cycles.

10  
11 189 The study includes patients aged  $\geq 18$  years with a histological diagnosis of G3  
12  
13 190 neuroendocrine carcinoma (GEP-NEC and lung NEC), Ki-67  $>20\%$  and measurable  
14  
15 191 disease according to Response evaluation criteria in solid tumors (RECIST) 1.1 criteria. All  
16  
17 192 patients must have an Eastern Cooperative Oncology Group (ECOG) performance  
18  
19 193 status  $\leq 2$  with a life expectancy  $> 3$  months and must have already undergone first-line  
20  
21 194 treatment for metastatic disease with platinum -based chemotherapy  
22  
23 195 (cisplatin/carboplatin and etoposide, FOLFOX4 or CAPOX). Adequate haematological,  
24  
25 196 liver and renal function is required and effective contraceptive methods must be used by  
26  
27 197 female patients of childbearing age. Written informed consent is obtained from all  
28  
29 198 patients to take part in the study. Exclusion criteria are as follows: metastatic NECs  
30  
31 199 previously treated with an irinotecan regimen, known hypersensitivity to 5-FU, calcium  
32  
33 200 levofolinate, irinotecan or their recipients. All acute toxic effects of any prior therapy  
34  
35 201 (including surgery, radiation therapy and chemotherapy) must have resolved to grade  $\leq 1$   
36  
37 202 according to National Cancer Institute Common Terminology Criteria for Adverse  
38  
39 203 Events Version 4.03 (CTCAE). Patients taking part in another clinical trial with any  
40  
41 204 investigational agent  $< 30$  days prior to study screening or with a history of allergic  
42  
43 205 reactions attributable to compounds of similar chemical or biological composition are  
44  
45 206 excluded Patients who have undergone chemotherapy or radiotherapy  $< 4$  weeks (6  
46  
47 207 weeks for nitrosoureas or mitomycin C) prior to entering the study, have not recovered  
48  
49 208 from adverse events caused by agents administered  $> 4$  weeks earlier, or have known  
50  
51 209 brain metastases are also not eligible for the study. Patients with other malignancies  
52  
53  
54  
55  
56  
57  
58  
59  
60

- 1  
2  
3  
4 210 with a disease-free interval of < 5 years (with the exception of non melanoma skin  
5  
6 211 cancer or low-grade superficial bladder cancer) are excluded, as are those with any  
7  
8 212 severe and/or uncontrolled medical condition or other condition that could affect their  
9  
10 213 participation in the study such as:  
11  
12  
13 214 • unstable angina pectoris, symptomatic congestive heart failure, myocardial infarction  
14  
15 215 < 6 months before the start of the study, serious uncontrolled cardiac arrhythmia or  
16  
17 216 any other clinically significant cardiac disease;  
18  
19 217 • severely impaired lung function (spirometry and DLCO 50% of the normal predicted  
20  
21 218 value and/or oxygen saturation  $\leq$  88% at rest, in room air);  
22  
23 219 • uncontrolled diabetes as defined by fasting serum glucose >1.5 x upper limit of  
24  
25 220 normal (ULN);  
26  
27 221 • any active (acute or chronic) or uncontrolled infections/disorders.

22 222 Tumor evaluation by anatomic imaging (multiphase CT and/or MRI) includes chest,  
23  
24 223 abdomen, pelvis, and any additional known sites of disease. These tests are performed  
25  
26 224 at baseline, every three months during treatment and after therapy discontinuation in  
27  
28 225 non-progressing patients until progression. When possible,  $^{68}\text{Ga}$ -PET/CT and  $^{18}\text{F}$ FDG-  
29  
30 226 PET/CT is performed at baseline.  
31  
32  
33  
34  
35  
36  
37  
38  
39  
40  
41  
42  
43  
44  
45

## 228 Study endpoints

46  
47  
48 229 The primary endpoint of the study is the DCR of each treatment, defined as the  
49  
50 230 percentage of patients who have achieved complete or partial response or stable disease  
51  
52 231 for at least 12 weeks from the start of therapy. DCR will be evaluated using the new  
53  
54 232 international criteria proposed by the RECIST version 1.1. Acute and late toxicity will  
55  
56 233 be evaluated by CTCAE Version 4.03, the latter defined as toxicity occurring at least 30  
57  
58  
59  
60

1  
2  
3  
4 234 days after the end of the last treatment cycle. Secondary endpoints are the evaluation of  
5  
6 235 OS, calculated from the start of treatment to death from any cause and PFS, calculated  
7  
8  
9 236 from the start of treatment to the date of the first documented evidence of disease  
10  
11 237 progression or of death from any cause. Patients without events at the time of analysis  
12  
13 238 will be censored at their last-known-alive date for OS and at their last date of tumor  
14  
15 239 evaluation for PFS. A further secondary endpoint is the evaluation of quality of life  
16  
17 240 using the European Organization for the Research and Treatment of Cancer Quality of  
18  
19 241 Life Questionnaire (EORTC QLQ-C30). When data are available, the impact of  
20  
21 242 baseline <sup>68</sup>Ga-PET/CT and <sup>18</sup>F-FDG-PET/CT on PFS will be analysed with exploratory  
22  
23 243 intent.- After signing the informed consent for biomarker evaluation, patients will  
24  
25 244 undergo evaluation of the mutation status of MEN1, DAXX, ATRX and RB-1 in  
26  
27 245 primary tumor tissue and of miRNA in blood samples. Assessment of the miRNA  
28  
29 246 profile will be performed on the first 20 patients who agree to participate in the  
30  
31 247 biological part of the study.  
32  
33  
34  
35  
36  
37  
38

### 39 249 Ethical considerations

40  
41 250 The present clinical trial (EudraCT 2016-000767-17), supported by IRST, was  
42  
43 251 authorized by the local Ethics Committee and the Italian Medicines Agency (AIFA); it  
44  
45 252 is also registered on the ClinicalTrials.gov website (NCT03387592). The study  
46  
47 253 complies with the ethical standards laid down in the 1964 Declaration of Helsinki and  
48  
49 254 the principles of Good Clinical Practice guidelines (including written informed  
50  
51 255 consent).  
52  
53  
54  
55

### 56 256 Patient and Public Involvement

57  
58 257 This research was done without patient involvement.  
59  
60

258

## 259 Statistical methods

260 The Bryant and Day design is used to estimate a sample size that takes into account  
261 both treatment activity and toxicity. Although randomisation is used to allocate patients  
262 to the 2 arms, no formal statistical comparisons between treatment regimens is planned.

263 The purpose of randomisation is to reduce bias due to patient assignment to a specific  
264 treatment arm. The hypothesis for the control arm is based on literature data (22, 23).

265 An  $\alpha$  level of 0.10 (both for toxicity and DCR) and a power of 90% were adopted. A  
266 DCR rate  $\geq 60\%$  and a relevant toxicity rate  $\leq 20\%$  are considered acceptable rates while  
267 a DCR rate  $\leq 40\%$  and a relevant toxicity rate  $\geq 40\%$  are considered unacceptable rates.

268 Given these hypotheses, the first step of the study will require 25 patients. If  $\geq 10$   
269 patients with a DCR are observed and  $\geq 15$  patients do not have relevant toxicity, the  
270 study will enrol patients in the next step. A total of 53 patients will be enrolled. If  $\geq 25$   
271 patients with DCR and  $\geq 36$  patients without any relevant toxicity are observed,  
272 treatment will be considered active and not toxic. This design is used for each treatment  
273 scheme and all analyses will be performed separately. If one of the schemes does not  
274 obtain the expected proportions of the first step, the arm will be closed and patients will  
275 be enrolled in the other arm until the target is reached; if the expected proportions are  
276 not reached in any arm, the study will be prematurely closed. If no premature stop  
277 occurs, a total of 106 evaluable patients are needed (53 patients in each arm). Taking  
278 into account a 5% dropout rate, 56 patients must be enrolled in each arm (total 112  
279 patients). G3-4 gastrointestinal toxicity, G4 thrombocytopenia, prolonged G3-G4  
280 neutropenia ( $> 7$  days) and drug-related hospitalizations are considered relevant  
281 toxicity. The stratification factors of this study are Ki-67 (21%-55 % vs.  $>55\%$ ) and site

1  
2  
3  
4 282 of primary tumor (lung vs. GEP).  
5

6 283 Complete response, partial response or stable disease for at least 12 weeks will be  
7  
8  
9 284 considered as the DCR. The proportion of patients in this category will be determined  
10  
11 285 and 95% confidence intervals (95% CIs) for the DCR will be calculated. OS and PFS  
12  
13 286 will be estimated using the Kaplan-Meier method (two-sided 95% CIs) (24). Appropriate  
14  
15 287 statistical analyses will be performed on the basis of the data available to compare  
16  
17 288 QLQ-C30 scores between baseline and subsequent follow-up visits.  
18  
19

20 289 When data are available, the impact of  $^{68}\text{Ga}$ -PET/CT result on PFS will be analyzed  
21  
22 290 with exploratory intent. The Shapiro-Wilk test will be used to determine the normality  
23  
24 291 distribution of each biomarker and, in the event of a non-normal distribution,  
25  
26 292 nonparametric statistics will be used to analyze the relationship between the serum  
27  
28 293 levels of each marker, considered as continuous variables, and response to treatment. In  
29  
30 294 case of normality distribution of biomarkers parametric test will be used. All endpoints  
31  
32 295 will be analysed separately for each treatment group.  
33  
34  
35

36 296

## 37 38 39 297 **Discussion**

40  
41 298 There is still no truly effective second-line chemotherapy for neuroendocrine  
42  
43 299 carcinoma. The overall prognosis of patients is poor, with an OS of 5 months in the  
44  
45 300 metastatic setting according to the SEER (Surveillance, Epidemiology, and End  
46  
47 301 Results) data (22). Only 5% of all patients are long-term survivors. There is also a  
48  
49 302 marked lack of prognostic and predictive factors (5).  
50

51  
52 303 Three phase II studies registered at *ClinicalTrials.gov* are currently investigating the  
53  
54 304 second-line treatment of GEP-NECs, the first focusing on FOLFIRI and bevacizumab  
55  
56 305 (NCT02820857), the second on everolimus (NCT02113800) and the third on avelumab  
57  
58  
59  
60



1  
2  
3  
4 306 (NCT03147404). Some abstracts were presented at ESMO (European Society for  
5  
6 307 Medical Oncology) 2018 and ASCO ( American Society of Clinical Oncology ) 2019  
7  
8 308 on the use of immunotherapy in GEP-NECs with inconclusive results. The SENECA  
9  
10 309 study uses a promising approach to the treatment of patients with metastatic NECS.  
11  
12 310 First, both the activity and safety of 2 regimens are assessed in the same setting with a  
13  
14 311 sizeable patient population (56 patients/arm). In addition, patients are stratified  
15  
16 312 according to Ki-67 index and morphology to investigate the role of each treatment  
17  
18 313 combination in both poorly differentiated and well differentiated NECs. Another aim of  
19  
20 314 this study is to integrate both biological and metabolic imaging data in an effort to  
21  
22 315 improve the current GEP-NEC classification.  
23  
24  
25  
26

27 316 In conclusion, there are still no FDA/EMA (Food and Drug Administration/European  
28  
29 317 Medicines Agency)-approved second-line therapeutic options for patients with  
30  
31 318 metastatic NECs. The SENECA trial could provide evidence of a novel therapeutic  
32  
33 319 option for patients. Moreover, the integration of biological and imaging data could be  
34  
35 320 lead to a better understanding of the natural history of the disease and help to identify  
36  
37 321 potential responders.  
38  
39  
40

41 322

42 323

#### 43 324 **Confidentiality**

44  
45  
46 325 This study will be conducted in full conformity with ICH (The International Council for  
47  
48 326 Harmonisation of Technical Requirements for Pharmaceuticals for Human Use)  
49  
50 327 Guidelines for Good Clinical Practice , Directive 2001/20/EEC of the European  
51  
52 328 Parliament and other relevant current local legislation. Participants will be allocated a  
53  
54 329 unique identification (ID) number at entry. The master list linking participant personal  
55  
56  
57  
58  
59  
60

1  
2  
3  
4 330 information and ID number will be maintained in a separate locked cabinet and  
5  
6 331 password-protected hard-drive. Data will be analysed by ID number only. Patient files  
7  
8  
9 332 and other source data will for be kept a maximum of 15 years.  
10  
11 333

### 13 334 **Dissemination**

15 335 After completing the study, all data, including beneficial and adverse events, of the trial  
16  
17 336 will be communicated at scientific meetings and published in indexed peer-reviewed  
18  
19 337 journals. If shown to be effective, the therapy program will be made available to the  
20  
21 338 general public in an appropriate manner.  
22  
23 339

### 27 340 **Abbreviations**

29 341 CAPTEM, capecitabine plus temozolomide; CgA, chromogranin A; DCR, disease  
30  
31 342 control rate; GEP, gastroenteropancreatic; NEC, neuroendocrine carcinoma; NET,  
32  
33 343 neuroendocrine tumor; OS, overall survival; PFS, progression-free survival; SRS,  
34  
35 344 somatostatin receptor scintigraphy.  
36  
37 345

### 41 346 **Author contributions**

43 347 AB, CL and TI designed the study and drafted the article. AB was responsible for data  
44  
45 348 acquisition. SP, SL, GDM, SS and ST provided methodological support and designed a  
46  
47 349 clinical information data extraction method for the protocol. FF performed the statistical  
48  
49 350 analysis. DS, FG, FP, RB, IL, FB and SR revised the paper for important intellectual  
50  
51 351 content. All authors read and approved the present version of the manuscript for  
52  
53 352 submission.  
54  
55 353

56  
57  
58  
59  
60

1  
2  
3  
4 354 **Data availability statement**  
5

6 355 The datasets used and analysed in the present study are available from the  
7  
8  
9 356 corresponding author on reasonable request.  
10

11 357

12  
13 358 **Funding**

14  
15 359 The study was conducted in the absence of any commercial or financial relationships  
16  
17  
18 360 that could be construed as a potential conflict of interest.  
19

20 361

21  
22 362 **Conflicts of interest**

23  
24  
25 363 The authors declare no conflict of interest.  
26

27 364

28  
29 365 **Acknowledgements**

30  
31 366 *SENECA study Team investigators*: Davide Campana, Davide Pastorelli, Nicola  
32

33 367 Silvestris, Francesco Silvestris, Angela Buonadonna, Giuseppe Badalamenti  
34  
35

36 368

37  
38 369 They also thank Gráinne Tierney and Cristiano Verna for editorial assistance.  
39

40 370

41 371

42  
43 372

44 373

45 374  
46  
47  
48  
49  
50  
51  
52  
53  
54  
55  
56  
57  
58  
59  
60

## 375 **References**

- 376 1. Kulke MH, Shah MH, Benson AB 3<sup>rd</sup>, Bergsland E, Berlin JD, Blasztkowsky LS, et  
377 al. Neuroendocrine tumors, version 1.2015. *J Natl Compr Canc Netw* (2015)  
378 13(1):78-108
- 379 2. Modlin IM, Moss SF, Chung DC, Jensen RT, Snyderwine E. Priorities for  
380 improving the management of gastroenteropancreatic neuroendocrine tumors. *J*  
381 *Natl Cancer Inst* (2008)100(18):1282-9. doi: 10.1093/jnci/djn275
- 382 3. Yao YC, Hassan M, Phan A, Dagohoy C, Leary C, Mares JE, et al. One hundred  
383 years after “carcinoid”: epidemiology of and prognostic factors for neuroendocrine  
384 tumors in 35,825 cases in the United States. *J Clin Oncol* (2008) 26(18):3063-72
- 385 4. Fraenkel M, Kim M, Faggiano A, de Herder WW, Valk GD; Knowledge NETwork.  
386 Incidence of gastroenteropancreatic neuroendocrine tumours: a systematic review  
387 of the literature. *Endocr Relat Cancer* (2014) 21(3):R153-63. doi: 10.1530/ERC-  
388 13-0125
- 389 5. Lloyd RV, Osamura RY, Klöppel G, Rosai J. WHO classification of tumours of  
390 endocrine organs. 4th ed (2017). Lyon: International Agency for Research on  
391 Cancer (IARC)
- 392 6. Heetfeld M, Chougnet CN, Olsen IH, Rinke A, Borbath I, Crespo G, et al.  
393 Characteristics and treatment of patients with G3 gastroenteropancreatic  
394 neuroendocrine neoplasms. *Endocr Relat Cancer* (2015) 22(4):657-64. doi:  
395 10.1530/ERC-15-0119
- 396 7. Walter T, Malka D, Hentic O, Lombard-Bohas C, Le Malicot K, Smith D, et al.  
397 Evaluating bevacizumab in combination with FOLFIRI after the failure of  
398 platinum-etoposide regimen in patients with advanced poorly

- 1  
2  
3  
4 399 differentiated neuroendocrine carcinoma: The PRODIGE 41-BEVANEC  
5  
6 400 randomized phase II study. *Dig Liver Dis* (2018) 50(2):195-8. doi:  
7  
8 401 10.1016/j.dld.2017.11.020  
9  
10  
11 402 8. Hadoux J, Malka D, Planchard D, Scoazec JY, Caramella C, Guigay J, et al. Post-  
12  
13 403 first-line FOLFOX chemotherapy for grade 3 neuroendocrine carcinoma. *Endocr*  
14  
15 404 *Relat Cancer* (2015) 22(3):289-98. doi: 10.1530/ERC-15-0075  
16  
17  
18 405 9. Olsen IH, Sørensen JB, Federspiel B, Kjaer A, Hansen CP, Knigge U, et al.  
19  
20 406 Temozolomide as second or third line treatment of patients with neuroendocrine  
21  
22 407 carcinomas. *Sci World J* (2012) 2012;2012:170496. doi: 10.1100/2012/170496  
23  
24  
25 408 10. Hentic O, Hammel P, Couvelard A, Rebours V, Zappa M, Palazzo M, et al.  
26  
27 409 FOLFIRI regimen: an effective second-line chemotherapy after failure of  
28  
29 410 etoposide-platinum combination in patients with neuroendocrine carcinomas grade  
30  
31 411 3. *Endocr Relat Cancer* (2012) 9(6):751-7. doi: 10.1530/ERC-12-0002  
32  
33  
34 412 11. Welin S, Sorbye H, Sebjornsen S, Knappskog S, Busch C, Oberg K. Clinical effect  
35  
36 413 of temozolomide-based chemotherapy in poorly differentiated endocrine carcinoma  
37  
38 414 after progression on first-line chemotherapy. *Cancer* (2011) 117(20):4617-22. doi:  
39  
40 415 10.1002/cncr.26124  
41  
42  
43 416 12. Noda K, Nishiwaki Y, Kawahara M, Negoro S, Sugiura T, Yokoyama A, et al.  
44  
45 417 Irinotecan plus cisplatin compared with etoposide plus cisplatin for extensive small-  
46  
47 418 cell lung cancer. *N Engl J Med* (2002) 346(2):85-91. doi: 10.1056/NEJMoa003034  
48  
49  
50 419 13. Derks JL, Leblay N, Thunnissen E, van Suylen RJ, den Bakker M, Groen HJM, et  
51  
52 420 al. Molecular subtypes of pulmonary large-cell neuroendocrine carcinoma predict  
53  
54 421 chemotherapy treatment outcome. *Clin Cancer Res* (2018) 24(1):33-42. doi:  
55  
56 422 10.1158/1078-0432.CCR-17-1921  
57  
58  
59  
60

- 1  
2  
3  
4 423 14. Tang LH, Untch BR, Reidy DL, O'Reilly E, Dhall D, Jih L, et al. Well-  
5  
6 424 differentiated neuroendocrine tumors with a morphologically apparent high-grade  
7  
8 425 component: a pathway distinct from poorly differentiated neuroendocrine  
9  
10 426 carcinomas. *Clin Cancer Res* (2016) 22(4):1011-7. doi: 10.1158/1078-0432.CCR-  
11  
12 427 15-0548  
13  
14  
15 428 15. Liverani C, Bongiovanni A, Mercatali L, Foca F, Pieri F, De Vita A, Spadazzi C,  
16  
17 429 Miserocchi G, Recine F, Riva N, Nicolini S, Severi S, Martinelli G, Ibrahim T.  
18  
19 430 Grading of Neuroendocrine Carcinomas: Correlation of 68Ga-PET/CT Scan with  
20  
21 431 Tissue Biomarkers. *Dis Markers*. 2018 Dec 2;2018:6878409.  
22  
23  
24 432 16. Grolmusz VK, Kövesdi A, Borks K, Igaz P, Patócs A. Prognostic relevance of  
25  
26 433 proliferation-related miRNAs in pancreatic neuroendocrine neoplasms Eur J  
27  
28 434 Endocrinol (2018) 179(4):219-28. doi: 10.1530/EJE-18-0305  
29  
30  
31 435 17. Gill P, Kim E, Chua TC, Clifton-Bligh RJ, Nahm CB, Mittal A, et al. MiRNA-3653  
32  
33 436 is a potential tissue biomarker for increased metastatic risk in pancreatic  
34  
35 437 neuroendocrine tumours. *Endocr Pathol* (2019). doi: 10.1007/s12022-019-9570-y  
36  
37 438 [Epub ahead of print]  
38  
39  
40 439 18. Panarelli N, Tyryshkin K, Wong JJM, Majewski A, Yang X, Scognamiglio T, et al.  
41  
42 440 Evaluating gastroenteropancreatic neuroendocrine tumors through microRNA  
43  
44 441 sequencing. *Endocr Relat Cancer* (2019) 26(1):47-57. doi: 10.1530/ERC-18-0244  
45  
46  
47 442 19. Malczewska A, Kidd M, Matar S, Kos-Kudla B, Modlin IM. A comprehensive  
48  
49 443 assessment of the role of mirnas as biomarkers in gastroenteropancreatic  
50  
51 444 neuroendocrine tumors. *Neuroendocrinology* (2018)107(1):73-90. doi:  
52  
53 445 10.1159/000487326  
54  
55  
56 446 20. Bongiovanni A, Riva N, Ricci M, Liverani C, La Manna F, De Vita A, et al. First-  
57  
58  
59  
60

- 1  
2  
3  
4 447 line chemotherapy in patients with metastatic gastroenteropancreatic  
5  
6 448 neuroendocrinecarcinoma. *Onco Targets Ther* (2015) 8:3613-9. doi:  
7  
8 449 10.2147/OTT.S91971  
9  
10  
11 450 21. Sansovini M, Severi S, Ianniello A, Nicolini S, Fantini L, Mezzenga E, Ferroni F,  
12  
13 451 Scarpi E, Monti M, Bongiovanni A, Cingarlini S, Grana CM, Bodei L, Paganelli G.  
14  
15 452 Long-term follow-up and role of  
16  
17 453 FDG PET in advanced pancreatic neuroendocrine patients treated with <sup>177</sup>Lu-D  
18  
19 454 OTATATE. *Eur J Nucl Med Mol Imaging*. 2017 Mar;44(3):490-499.  
20  
21  
22 455  
23  
24  
25 456 22. Sorbye H, Welin S, Langer SW, Vestermark LW, Holt N, Osterlund P, et al.  
26  
27 457 Predictive and prognostic factors for treatment and survival in 305 patients with  
28  
29 458 advanced Gastrointestinal neuroendocrine carcinoma (WHO G3):  
30  
31 459 the NORDIC NEC study. *Ann Oncol* (2013) 24(1):152-60. doi:  
32  
33 460 10.1093/annonc/mds276  
34  
35  
36 461 23. Perren A, Couvelard A, Scoazec JY, Costa F, Borbath I, Delle Fave G, et al.  
37  
38 462 ENETS consensus guidelines for the standards of care in neuroendocrine tumors:  
39  
40 463 pathology: diagnosis and prognostic stratification. *Neuroendocrinology* (2017)  
41  
42 464 105(3):196-200. doi: 10.1159/000457956  
43  
44  
45 465 24. Kaplan EL, Meier P. Nonparametric estimation from incomplete observations. J.  
46  
47 466 *Amer. Statist Assoc* (1958) 53:457-81.  
48  
49  
50 467  
51  
52 468  
53  
54 469  
55  
56 470  
57  
58  
59  
60

1  
2  
3  
4 471

5  
6 472

7  
8 473

9  
10 474

11  
12 475

13  
14 476

15  
16 477

17  
18 478

19  
20 479

21  
22 480

23  
24  
25  
26  
27 **Figure legend**

28  
29  
30 **FIGURE 1** | SENECA study design.

31  
32 483  
33  
34  
35  
36  
37  
38  
39  
40  
41  
42  
43  
44  
45  
46  
47  
48  
49  
50  
51  
52  
53  
54  
55  
56  
57  
58  
59  
60

For peer review only



1  
2  
3  
4  
5  
6  
7  
8  
9  
10  
11  
12  
13  
14  
15  
16  
17  
18  
19  
20  
21  
22  
23  
24  
25  
26  
27  
28  
29  
30  
31  
32  
33  
34  
35  
36  
37  
38  
39  
40  
41

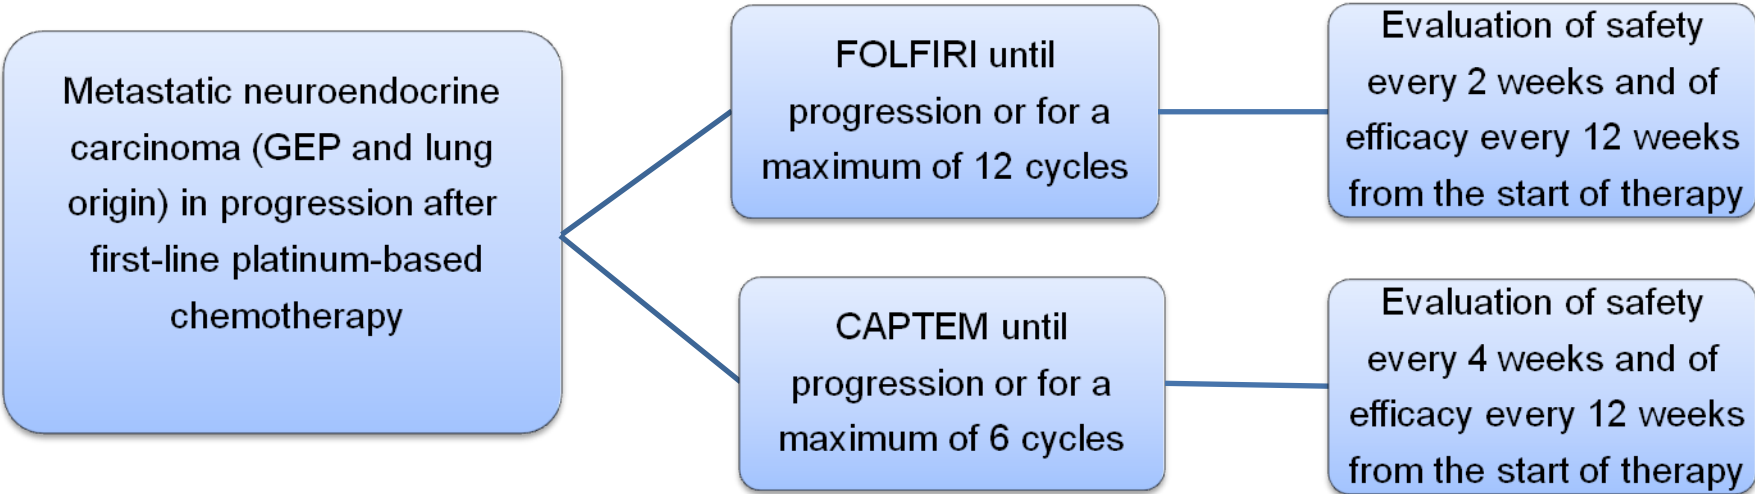

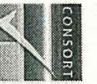

# CONSORT 2010 checklist of information to include when reporting a randomised trial\*

| Section/Topic                    | Item No | Checklist item                                                                                                                                                                              | Reported on page No |
|----------------------------------|---------|---------------------------------------------------------------------------------------------------------------------------------------------------------------------------------------------|---------------------|
| Title and abstract               | 1a      | Identification as a randomised trial in the title                                                                                                                                           | 1                   |
|                                  | 1b      | Structured summary of trial design, methods, results, and conclusions (for specific guidance see CONSORT for abstracts)                                                                     | 3                   |
| Introduction                     | 2a      | Scientific background and explanation of rationale                                                                                                                                          | 5-7                 |
|                                  | 2b      | Specific objectives or hypotheses                                                                                                                                                           | 7                   |
| Methods                          | 3a      | Description of trial design (such as parallel, factorial) including allocation ratio                                                                                                        | 8-11                |
|                                  | 3b      | Important changes to methods after trial commencement (such as eligibility criteria), with reasons                                                                                          | not applicable      |
|                                  | 4a      | Eligibility criteria for participants                                                                                                                                                       | 9                   |
|                                  | 4b      | Settings and locations where the data were collected                                                                                                                                        | 14-15               |
|                                  | 5       | The interventions for each group with sufficient details to allow replication, including how and when they were actually administered                                                       | 8, 9                |
| Outcomes                         | 6a      | Completely defined pre-specified primary and secondary outcome measures, including how and when they were assessed                                                                          | 10, 11              |
|                                  | 6b      | Any changes to trial outcomes after the trial commenced, with reasons                                                                                                                       | N/A                 |
|                                  | 7a      | How sample size was determined                                                                                                                                                              | 12                  |
| Sample size                      | 7a      | How sample size was determined                                                                                                                                                              | N/A                 |
|                                  | 7b      | When applicable, explanation of any interim analyses and stopping guidelines                                                                                                                | 12                  |
|                                  | 8a      | Method used to generate the random allocation sequence                                                                                                                                      | 12                  |
| Randomisation:                   | 8a      | Method used to generate the random allocation sequence                                                                                                                                      | 12                  |
|                                  | 8b      | Type of randomisation; details of any restriction (such as blocking and block size)                                                                                                         | 12                  |
| Allocation concealment mechanism | 9       | Mechanism used to implement the random allocation sequence (such as sequentially numbered containers), describing any steps taken to conceal the sequence until interventions were assigned | 12                  |
|                                  | 10      | Who generated the random allocation sequence, who enrolled participants, and who assigned participants to interventions                                                                     | 12                  |
| Blinding                         | 10      | Who generated the random allocation sequence, who enrolled participants, and who assigned participants to interventions                                                                     | N/A                 |
|                                  | 11a     | If done, who was blinded after assignment to interventions (for example, participants, care providers, those                                                                                | N/A                 |

1  
2  
3  
4  
5  
6  
7  
8  
9  
10  
11  
12  
13  
14  
15  
16  
17  
18  
19  
20  
21  
22  
23  
24  
25  
26  
27  
28  
29  
30  
31  
32  
33  
34  
35  
36  
37  
38  
39  
40  
41  
42  
43  
44  
45  
46  
47  
48  
49  
50  
51  
52  
53  
54  
55  
56  
57  
58  
59  
60

\_\_\_\_\_ N/A  
 \_\_\_\_\_ N/A  
 11b If relevant, description of the similarity of interventions  
 12a Statistical methods used to compare groups for primary and secondary outcomes  
 12b Methods for additional analyses, such as subgroup analyses and adjusted analyses  
 \_\_\_\_\_ 12, 13  
 \_\_\_\_\_ 12

**Results**

13a For each group, the numbers of participants who were randomly assigned, received intended treatment, and diagram is strongly recommended) were analysed for the primary outcome  
 13b For each group, losses and exclusions after randomisation, together with reasons  
 14a Dates defining the periods of recruitment and follow-up  
 14b Why the trial ended or was stopped  
 \_\_\_\_\_ 8, 12  
 \_\_\_\_\_ 12  
 \_\_\_\_\_ 12  
 \_\_\_\_\_ N/A

15 A table showing baseline demographic and clinical characteristics for each group  
 16 For each group, number of participants (denominator) included in each analysis and whether the analysis was by original assigned groups  
 \_\_\_\_\_ N/A

17a For each primary and secondary outcome, results for each group, and the estimated effect size and its estimation precision (such as 95% confidence interval)  
 17b For binary outcomes, presentation of both absolute and relative effect sizes is recommended  
 \_\_\_\_\_ 12  
 \_\_\_\_\_ 12

18 Results of any other analyses performed, including subgroup analyses and adjusted analyses, distinguishing pre-specified from exploratory  
 \_\_\_\_\_ 12

**Discussion**

19 All important harms or unintended effects in each group (for specific guidance see CONSORT for harms)  
 \_\_\_\_\_

20 Trial limitations, addressing sources of potential bias, imprecision, and, if relevant, multiplicity of analyses  
 \_\_\_\_\_ 4

21 Generalisability (external validity, applicability) of the trial findings  
 \_\_\_\_\_ 13, 14

22 Interpretation consistent with results, balancing benefits and harms, and considering other relevant evidence  
 \_\_\_\_\_ 13, 14

**Other information**

23 Registration number and name of trial registry  
 \_\_\_\_\_ 13

24 Where the full trial protocol can be accessed, if available  
 \_\_\_\_\_ All, 15

25 Sources of funding and other support (such as supply of drugs), role of funders  
 \_\_\_\_\_ 16

\*We strongly recommend reading this statement in conjunction with the CONSORT 2010 Explanation and Elaboration for important clarifications on all the items. If relevant, we also recommend reading CONSORT extensions for cluster randomised trials, non-inferiority and equivalence trials, non-pharmacological treatments, herbal interventions, and pragmatic trials. Additional extensions are forthcoming: for those and for up to date references relevant to this checklist, see [www.consort-statement.org](http://www.consort-statement.org).

1  
2  
3  
4  
5  
6  
7  
8  
9  
10  
11  
12  
13  
14  
15  
16  
17  
18  
19  
20  
21  
22  
23  
24  
25  
26  
27  
28  
29  
30  
31  
32  
33  
34  
35  
36  
37  
38  
39  
40  
41  
42  
43  
44  
45  
46  
47  
48  
49  
50  
51  
52  
53  
54  
55  
56  
57  
58  
59  
60

1  
2  
3  
4  
5  
6  
7  
8  
9  
10  
11  
12  
13  
14  
15  
16  
17  
18  
19  
20  
21  
22  
23  
24  
25  
26  
27  
28  
29  
30  
31  
32  
33  
34  
35  
36  
37  
38  
39  
40  
41  
42  
43  
44  
45  
46  
47  
48  
49  
50  
51  
52  
53  
54  
55  
56  
57  
58  
59  
60

|    |                                                                                                                                                                                                                                                                                          |    |                            |
|----|------------------------------------------------------------------------------------------------------------------------------------------------------------------------------------------------------------------------------------------------------------------------------------------|----|----------------------------|
| 1  | Descriptive title identifying the study design, population, interventions, and, if applicable, trial acronym                                                                                                                                                                             | 1  | Title                      |
| 2  | Trial identifier and registry name. If not yet registered, name of intended registry                                                                                                                                                                                                     | 2a | Trial registration         |
| 3  | All items from the World Health Organization Trial Registration Data Set                                                                                                                                                                                                                 | 2b |                            |
| 4  | Date and version identifier                                                                                                                                                                                                                                                              | 3  | Protocol version           |
| 5  | Sources and types of financial, material, and other support                                                                                                                                                                                                                              | 4  | Funding                    |
| 6  | Names, affiliations, and roles of protocol contributors                                                                                                                                                                                                                                  | 5a | Roles and responsibilities |
| 7  | Name and contact information for the trial sponsor                                                                                                                                                                                                                                       | 5b |                            |
| 8  | Role of study sponsor and funders, if any, in study design, collection, management, analysis, and interpretation of data; writing of the report; and the decision to submit the report for publication, including whether they will have ultimate authority over any of these activities | 5c |                            |
| 9  | Composition, roles, and responsibilities of the coordinating centre, steering committee, endpoint adjudication committee, data management team, and other individuals or groups overseeing the trial, if applicable (see Item 21a for data monitoring committee)                         | 5d |                            |
| 10 | Description of research question and justification for undertaking the trial, including summary of relevant studies (published and unpublished) examining benefits and harms for each intervention                                                                                       | 6a | Background and rationale   |
| 11 | Explanation for choice of comparators                                                                                                                                                                                                                                                    | 6b |                            |
| 12 | Specific objectives or hypotheses                                                                                                                                                                                                                                                        | 7  | Objectives                 |
| 13 | Description of trial design including type of trial (eg, parallel group, crossover, factorial, single group), allocation ratio, and framework (eg, superiority, equivalence, noninferiority, exploratory)                                                                                | 8  | Trial design               |

**Introduction**

**Administrative information**

SPRIT 2013 Checklist: Recommended items to address in a clinical trial protocol and related documents\*

STANDARD PROTOCOL ITEMS: RECOMMENDATIONS FOR INTERVENTIONAL TRIALS

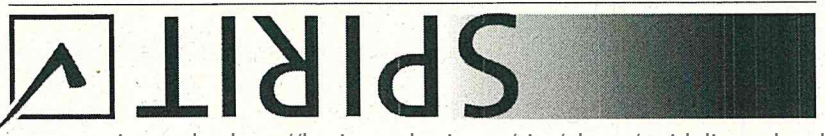

| <b>Methods: Participants, interventions, and outcomes</b>           |                                                                                                                                                                                                                                                                                                                                                                                               |
|---------------------------------------------------------------------|-----------------------------------------------------------------------------------------------------------------------------------------------------------------------------------------------------------------------------------------------------------------------------------------------------------------------------------------------------------------------------------------------|
| 9                                                                   | Study setting<br>Description of study settings (eg, community clinic, academic hospital) and list of countries where data will be collected. Reference to where list of study sites can be obtained                                                                                                                                                                                           |
| 10                                                                  | Eligibility criteria<br>10 Inclusion and exclusion criteria for participants. If applicable, eligibility criteria for study centres and individuals who will perform the interventions (eg, surgeons, psychotherapists)                                                                                                                                                                       |
| 11a                                                                 | Interventions<br>11a Interventions for each group with sufficient detail to allow replication, including how and when they will be administered                                                                                                                                                                                                                                               |
| 11b                                                                 | 11b Criteria for discontinuing or modifying allocated interventions for a given trial participant (eg, drug dose change in response to harms, participant request, or improving/worsening disease)                                                                                                                                                                                            |
| 11c                                                                 | 11c Strategies to improve adherence to intervention protocols, and any procedures for monitoring adherence (eg, drug tablet return, laboratory tests)                                                                                                                                                                                                                                         |
| 11d                                                                 | 11d Relevant concomitant care and interventions that are permitted or prohibited during the trial                                                                                                                                                                                                                                                                                             |
| 12                                                                  | Outcomes<br>12 Primary, secondary, and other outcomes, including the specific measurement variable (eg, systolic blood pressure), analysis metric (eg, change from baseline, final value, time to event), method of aggregation (eg, median, proportion), and time point for each outcome. Explanation of the clinical relevance of chosen efficacy and harm outcomes is strongly recommended |
| 13                                                                  | Participant timeline<br>13 Time schedule of enrolment, interventions (including any run-ins and washouts), assessments, and visits for participants. A schematic diagram is highly recommended (see Figure)                                                                                                                                                                                   |
| 14                                                                  | Sample size<br>14 Estimated number of participants needed to achieve study objectives and how it was determined, including clinical and statistical assumptions supporting any sample size calculations                                                                                                                                                                                       |
| 15                                                                  | Recruitment<br>15 Strategies for achieving adequate participant enrolment to reach target sample size                                                                                                                                                                                                                                                                                         |
| <b>Methods: Assignment of interventions (for controlled trials)</b> |                                                                                                                                                                                                                                                                                                                                                                                               |
| Allocation:                                                         |                                                                                                                                                                                                                                                                                                                                                                                               |
| 16a                                                                 | Sequence generation<br>16a Method of generating the allocation sequence (eg, computer-generated random numbers), and list of any factors for stratification. To reduce predictability of a random sequence, details of any planned restriction (eg, blocking) should be provided in a separate document that is unavailable to those who enrol participants or assign interventions           |



|    |     |                                                                              |                                                                               |
|----|-----|------------------------------------------------------------------------------|-------------------------------------------------------------------------------|
| 1  |     |                                                                              |                                                                               |
| 2  |     |                                                                              |                                                                               |
| 3  |     |                                                                              |                                                                               |
| 4  |     |                                                                              |                                                                               |
| 5  |     |                                                                              | level dataset, and statistical code                                           |
| 6  | 31c | Plans, if any, for granting public access to the full protocol, participant- |                                                                               |
| 7  |     |                                                                              | writers                                                                       |
| 8  |     |                                                                              |                                                                               |
| 9  | 31b | Authorship eligibility guidelines and any intended use of professional       |                                                                               |
| 10 |     |                                                                              |                                                                               |
| 11 |     |                                                                              | data sharing arrangements), including any publication restrictions            |
| 12 |     |                                                                              | groups (eg, via publication, reporting in results databases, or other         |
| 13 |     |                                                                              | participants, healthcare professionals, the public, and other relevant        |
| 14 | 31a | Plans for investigators and sponsor to communicate trial results to          | Dissemination policy                                                          |
| 15 |     |                                                                              |                                                                               |
| 16 |     |                                                                              | compensation to those who suffer harm from trial participation                |
| 17 | 30  | Provisions, if any, for ancillary and post-trial care, and for               | Ancillary and post-trial care                                                 |
| 18 |     |                                                                              |                                                                               |
| 19 |     |                                                                              | investigators                                                                 |
| 20 |     |                                                                              | disclosure of contractual agreements that limit such access for               |
| 21 |     |                                                                              | Statement of who will have access to the final trial dataset, and             |
| 22 | 29  |                                                                              | Access to data                                                                |
| 23 |     |                                                                              | the overall trial and each study site                                         |
| 24 |     |                                                                              | Financial and other competing interests for principal investigators for       |
| 25 | 28  |                                                                              | Declaration of interests                                                      |
| 26 |     |                                                                              | before, during, and after the trial                                           |
| 27 |     |                                                                              | be collected, shared, and maintained in order to protect confidentiality      |
| 28 |     |                                                                              | How personal information about potential and enrolled participants will       |
| 29 | 27  |                                                                              | Confidentiality                                                               |
| 30 |     |                                                                              | and biological specimens in ancillary studies, if applicable                  |
| 31 |     |                                                                              | Additional consent provisions for collection and use of participant data      |
| 32 | 26b |                                                                              |                                                                               |
| 33 |     |                                                                              | participants or authorised surrogates, and how (see item 32)                  |
| 34 |     |                                                                              | Who will obtain informed consent or assent from potential trial               |
| 35 | 26a |                                                                              | Consent or assent                                                             |
| 36 |     |                                                                              | regulators)                                                                   |
| 37 |     |                                                                              | (eg, investigators, REC/IRBs, trial participants, trial registries, journals, |
| 38 |     |                                                                              | changes to eligibility criteria, outcomes, analyses) to relevant parties      |
| 39 |     |                                                                              | Plans for communicating important protocol modifications (eg,                 |
| 40 | 25  |                                                                              | Protocol amendments                                                           |
| 41 |     |                                                                              | (REC/IRB) approval                                                            |
| 42 |     |                                                                              | Plans for seeking research ethics committee/institutional review board        |
| 43 | 24  |                                                                              | Research ethics approval                                                      |
| 44 |     |                                                                              |                                                                               |
| 45 |     |                                                                              |                                                                               |
| 46 |     |                                                                              |                                                                               |
| 47 |     |                                                                              |                                                                               |
| 48 |     |                                                                              |                                                                               |
| 49 |     |                                                                              |                                                                               |
| 50 |     |                                                                              | sponsor                                                                       |
| 51 |     |                                                                              | whether the process will be independent from investigators and the            |
| 52 | 23  |                                                                              | Auditing                                                                      |
| 53 |     |                                                                              | Frequency and procedures for auditing trial conduct, if any, and              |
| 54 |     |                                                                              | of trial interventions or trial conduct                                       |
| 55 |     |                                                                              | spontaneously reported adverse events and other unintended effects            |
| 56 |     |                                                                              | Plans for collecting, assessing, reporting, and managing solicited and        |
| 57 | 22  |                                                                              | Harms                                                                         |
| 58 |     |                                                                              | decision to terminate the trial                                               |
| 59 |     |                                                                              | who will have access to these interim results and make the final              |
| 60 | 21b | Description of any interim analyses and stopping guidelines, including       |                                                                               |

1  
2  
3  
4  
5  
6  
7  
8  
9  
10  
11  
12  
13  
14  
15  
16  
17  
18  
19  
20  
21  
22  
23  
24  
25  
26  
27  
28  
29  
30  
31  
32  
33  
34  
35  
36  
37  
38  
39  
40  
41  
42  
43  
44  
45  
46  
47  
48  
49  
50  
51  
52  
53  
54  
55  
56  
57  
58  
59  
60

**Appendices**

|                                                                                                                                                                                                |    |                      |
|------------------------------------------------------------------------------------------------------------------------------------------------------------------------------------------------|----|----------------------|
| Model consent form and other related documentation given to participants and authorised surrogates                                                                                             | 32 | Informed consent     |
| Plans for collection, laboratory evaluation, and storage of biological specimens for genetic or molecular analysis in the current trial and for future use in ancillary studies, if applicable | 33 | Biological specimens |

\*It is strongly recommended that this checklist be read in conjunction with the SPIRIT 2013 Explanation & Elaboration for important clarification on the items. Amendments to the protocol should be tracked and dated. The SPIRIT checklist is copyrighted by the SPIRIT Group under the Creative Commons "Attribution-NonCommercial-NoDerivs 3.0 Unported" license.

The above items have been advised when applicable.  
The responsible author.

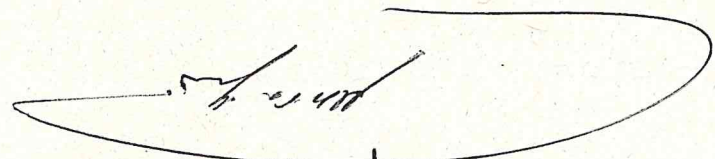



1  
2  
3  
4  
5  
6  
7  
8  
9  
10  
11  
12  
13  
14  
15  
16  
17  
18  
19  
20  
21  
22  
23  
24  
25  
26  
27  
28  
29  
30  
31  
32  
33  
34  
35  
36  
37  
38  
39  
40  
41  
42  
43  
44  
45  
46  
47  
48  
49  
50  
51  
52  
53  
54  
55  
56  
57  
58  
59  
60

# BMJ Open

## Randomized Phase II Trial of CAPTEM or FOLFIRI as Second-line Therapy in Neuroendocrine Carcinomas and Exploratory Analysis of Predictive Role of PET/CT Imaging and Biological Markers (SENECA Study)

|                                 |                                                                                                                                                                                                                                                                                                                                                                                                                                                                                                                                                                                                                                                                                                                                                                                                                                                                                                                                                                                                                                                                                                                                                                                                                                                                                                                                     |
|---------------------------------|-------------------------------------------------------------------------------------------------------------------------------------------------------------------------------------------------------------------------------------------------------------------------------------------------------------------------------------------------------------------------------------------------------------------------------------------------------------------------------------------------------------------------------------------------------------------------------------------------------------------------------------------------------------------------------------------------------------------------------------------------------------------------------------------------------------------------------------------------------------------------------------------------------------------------------------------------------------------------------------------------------------------------------------------------------------------------------------------------------------------------------------------------------------------------------------------------------------------------------------------------------------------------------------------------------------------------------------|
| Journal:                        | <i>BMJ Open</i>                                                                                                                                                                                                                                                                                                                                                                                                                                                                                                                                                                                                                                                                                                                                                                                                                                                                                                                                                                                                                                                                                                                                                                                                                                                                                                                     |
| Manuscript ID                   | bmjopen-2019-034393.R1                                                                                                                                                                                                                                                                                                                                                                                                                                                                                                                                                                                                                                                                                                                                                                                                                                                                                                                                                                                                                                                                                                                                                                                                                                                                                                              |
| Article Type:                   | Protocol                                                                                                                                                                                                                                                                                                                                                                                                                                                                                                                                                                                                                                                                                                                                                                                                                                                                                                                                                                                                                                                                                                                                                                                                                                                                                                                            |
| Date Submitted by the Author:   | 24-Jan-2020                                                                                                                                                                                                                                                                                                                                                                                                                                                                                                                                                                                                                                                                                                                                                                                                                                                                                                                                                                                                                                                                                                                                                                                                                                                                                                                         |
| Complete List of Authors:       | Bongiovanni, Alberto; Istituto Scientifico Romagnolo per lo Studio e la Cura dei Tumori Srl, Osteoncology and Rare Tumor Center<br>Liverani, Chiara; Istituto Scientifico Romagnolo per lo Studio e la Cura dei Tumori Srl, Osteoncology and Rare Tumor Center<br>Pusceddu, Sara; Fondazione IRCCS Istituto Nazionale dei Tumori<br>Leo, Silvana; ospedale civico<br>Di Meglio, Giovanni; Bolzano Hospital<br>Tamberi, Stefano; Medical Oncology, Ospedale degli Infermi, Faenza<br>Santini, Daniele<br>Gelsomino, Fabio; Azienda Ospedaliero-Universitaria di Modena<br>Pucci, Francesca; Azienda Ospedaliero-Universitaria di Parma<br>Berardi, Rossana; AOU-Ospedali Riuniti Umberto I - G.M. Lancisi - G. Salesi<br>Lolli, Ivan; Istituto Nazionale di Ricovero e Cura a Carattere Scientifico Saverio de Bellis, ; IRCCS "Saverio de Bellis"<br>Bergamo, Francesca; IOV IRCCS<br>Ricci, Sergio; Pisa University Hospital<br>Foca, Flavia; IRCCS Istituto Scientifico Romagnolo per lo Studio e la Cura dei Tumori, Biostatistics and Clinical Trials Unit Meldola, FC, IT<br>Severi, Stefano; Nuclear Medicine Unit Istituto Scientifico Romagnolo per lo Studio e la Cura dei Tumori (IRST) IRCCS<br>Ibrahim, Toni; Istituto Scientifico Romagnolo per lo Studio e la Cura dei Tumori Srl, Osteoncology and Rare Tumor Center |
| <b>Primary Subject Heading</b>: | Oncology                                                                                                                                                                                                                                                                                                                                                                                                                                                                                                                                                                                                                                                                                                                                                                                                                                                                                                                                                                                                                                                                                                                                                                                                                                                                                                                            |
| Secondary Subject Heading:      | Oncology                                                                                                                                                                                                                                                                                                                                                                                                                                                                                                                                                                                                                                                                                                                                                                                                                                                                                                                                                                                                                                                                                                                                                                                                                                                                                                                            |
| Keywords:                       | CAPTEM, neuroendocrine carcinoma, FOLFIRI, capecitabine, temozolomide, second-line                                                                                                                                                                                                                                                                                                                                                                                                                                                                                                                                                                                                                                                                                                                                                                                                                                                                                                                                                                                                                                                                                                                                                                                                                                                  |
|                                 |                                                                                                                                                                                                                                                                                                                                                                                                                                                                                                                                                                                                                                                                                                                                                                                                                                                                                                                                                                                                                                                                                                                                                                                                                                                                                                                                     |

SCHOLARONE™  
Manuscripts

1  
2  
3  
4  
5  
6  
7  
8  
9  
10  
11  
12  
13  
14  
15  
16  
17  
18  
19  
20  
21  
22  
23  
24  
25  
26  
27  
28  
29  
30  
31  
32  
33  
34  
35  
36  
37  
38  
39  
40  
41  
42  
43  
44  
45  
46  
47  
48  
49  
50  
51  
52  
53  
54  
55  
56  
57  
58  
59  
60



I, the Submitting Author has the right to grant and does grant on behalf of all authors of the Work (as defined in the below author licence), an exclusive licence and/or a non-exclusive licence for contributions from authors who are: i) UK Crown employees; ii) where BMJ has agreed a CC-BY licence shall apply, and/or iii) in accordance with the terms applicable for US Federal Government officers or employees acting as part of their official duties; on a worldwide, perpetual, irrevocable, royalty-free basis to BMJ Publishing Group Ltd ("BMJ") its licensees and where the relevant Journal is co-owned by BMJ to the co-owners of the Journal, to publish the Work in this journal and any other BMJ products and to exploit all rights, as set out in our [licence](#).

The Submitting Author accepts and understands that any supply made under these terms is made by BMJ to the Submitting Author unless you are acting as an employee on behalf of your employer or a postgraduate student of an affiliated institution which is paying any applicable article publishing charge ("APC") for Open Access articles. Where the Submitting Author wishes to make the Work available on an Open Access basis (and intends to pay the relevant APC), the terms of reuse of such Open Access shall be governed by a Creative Commons licence – details of these licences and which [Creative Commons](#) licence will apply to this Work are set out in our licence referred to above.

Other than as permitted in any relevant BMJ Author's Self Archiving Policies, I confirm this Work has not been accepted for publication elsewhere, is not being considered for publication elsewhere and does not duplicate material already published. I confirm all authors consent to publication of this Work and authorise the granting of this licence.

1  
2  
3  
4 1 **CLINICAL STUDY PROTOCOL**5  
6 27  
8 3 **Randomized Phase II Trial of CAPTEM or FOLFIRI as**  
9 4 **SEcond-line Therapy in NEuroendocrine CARcinomas and**  
10 5 **Exploratory Analysis of Predictive Role of PET/CT Imaging**  
11 6 **and Biological Markers (SENECA Study)**12 7 **Running title: Second-line CAPTEM/FOLFIRI in NECs**

13 8

14 9 *Alberto Bongiovanni<sup>1\*</sup>, Chiara Liverani<sup>1</sup>, Sara Pusceddu<sup>2</sup>, Silvana Leo<sup>3</sup>, Giovanni Di*  
15 10 *Meglio<sup>4</sup>, Stefano Tamberi<sup>5</sup>, Daniele Santini<sup>6</sup>, Fabio Gelsomino<sup>7</sup>, Francesca Pucci<sup>8</sup>,*  
16 11 *Rossana Berardi<sup>9</sup>, Ivan Lolli<sup>10</sup>, Francesca Bergamo<sup>11</sup>, Sergio Ricci<sup>12</sup>, Flavia Foca<sup>13</sup>*  
17 12 *Stefano Severi<sup>14</sup>, Toni Ibrahim<sup>1</sup>, and the SENECA Study Team Investigators\**18 13  
19 14 *<sup>1</sup>Osteoncology and Rare Tumors Center, Istituto Scientifico Romagnolo per lo Studio e*  
20 15 *la Cura dei Tumori (IRST) IRCCS, Meldola, Italy, <sup>2</sup>Istituto Nazionale Tumori Milano*  
21 16 *IRCCS, Milan, Italy, <sup>3</sup>Oncology Unit, Ospedale Civico, Lecce, Italy, <sup>4</sup>Onocology Unit,*  
22 17 *Ospedale di Bolzano, Bolzano, Italy, <sup>5</sup>Medical Oncology, Ospedale degli Infermi,*  
23 18 *Faenza, Italy, <sup>6</sup>Università Campus Bio-Medico, Roma, Italy, <sup>7</sup>Azienda Ospedaliera-*  
24 19 *Universitaria di Modena, Modena, Italy, <sup>8</sup>Azienda Ospedaliera-Universitaria di Parma,*  
25 20 *Parma, Italy, <sup>9</sup>AOU-Ospedali Riuniti Umberto I - G.M. Lancisi - G. Salesi, Ancona,*  
26 21 *Italy, <sup>10</sup>IRCCS "Saverio De Bellis", Castellana Grotte, Italy, <sup>11</sup>Istituto Oncologico*  
27 22 *Veneto (IOV), Padua, Italy, <sup>12</sup>Ospedale S. Chiara - AOU Pisana, Pisa, Italy, <sup>13</sup>Unit of*  
28 23 *Biostatistics and Clinical Trials, Istituto Scientifico Romagnolo per lo Studio e la Cura*  
29 24 *dei Tumori (IRST) IRCCS, Meldola, Italy, <sup>14</sup>Nuclear Medicine Unit, Istituto Scientifico*  
30 25 *Romagnolo per lo Studio e la Cura dei Tumori (IRST) IRCCS, Meldola, Italy*

1  
2  
3  
4 26  
5

6 27 **\*Correspondence:** Alberto Bongiovanni, MD  
7

8  
9 28 Osteoncology and Rare Tumors Center, Istituto Scientifico Romagnolo per lo Studio e  
10

11 29 la Cura dei Tumori (IRST) IRCCS, Via Piero Maroncelli 40, 47014 Meldola (FC), Italy  
12

13 30 Tel.: +39-0543-739100; Fax: +39-0543-739123  
14

15  
16 31 E-mail: [alberto.bongiovanni@irst.emr.it](mailto:alberto.bongiovanni@irst.emr.it)  
17

18 32  
19

20 33 **Language style:** This article is formatted in British English.  
21

22 34  
23

24 35  
25

26 36  
27

28 37  
29

30 38  
31

32 39  
33

34 40  
35

36 41  
37

38 42  
39

40 43  
41

42 44  
43

44 45  
45

46 46  
47

48 47  
49

50 48  
51

52 49  
53

54 50  
55

56 51  
57

58 52  
59

60 53

1  
2  
3  
4  
5  
6  
7  
8  
9  
10  
11  
12  
13  
14  
15  
16  
17  
18  
19  
20  
21  
22  
23  
24  
25  
26  
27  
28  
29  
30  
31  
32  
33  
34  
35  
36  
37  
38  
39  
40  
41  
42  
43  
44  
45  
46  
47  
48  
49  
50  
51  
52  
53  
54  
55  
56  
57  
58  
59  
60**Abstract**

**Introduction:** Patients with metastatic or locally advanced, non-resectable, grade 3 poorly-differentiated gastroenteropancreatic (GEP) and lung neuroendocrine carcinomas (NECs) are usually treated with in first-line platinum compounds. There is no standard second-line treatment upon progression. Accurate biomarkers are needed to facilitate diagnosis and prognostic assessment of NEC patients.

**Methods and Analysis:** The SENECA (SEcond-line therapy in NEuroendocrine CArcinomas) study is a randomised, non-comparative, multicentre phase II trial designed to evaluate the efficacy and safety of folinic acid, 5-fluorouracil and irinotecan (FOLFIRI) or capecitabine plus temozolomide (CAPTEM) regimens after failure of first-line-chemotherapy in lung NEC and GEP-NEC patients. Secondary aims are to correlate the serum miRNA profile and primary mutational status of MEN1, DAXX, ATRX and RB-1 with prognosis and outcome and to investigate the prognostic and predictive role of the Ki-67 score and FDG- or <sup>68</sup>Ga-PET/CT. The main eligibility criteria are age  $\geq 18$  years; metastatic or locally advanced, non-resectable, grade 3 lung or GEP-NECs; progression to first-line platinum-based chemotherapy. A Bryant and Day design taking into account treatment activity and toxicity was used to estimate the sample size. All analysis will be performed separately for each treatment group in the intention-to-treat population. A total of 112 patients (56/arm) will be randomly assigned (1:1) to receive FOLFIRI every 14 days or CAPTEM every 28 days until disease progression or unacceptable toxicity or for a maximum of six months. Patients undergo testing for specific biomarkers in primary tumour tissue and for miRNA in blood samples. MiRNA profiling will be performed in the first 20 patients who agree to

1  
2  
3  
4 69 participate in the biological sub-study.  
5

6 70 **Ethics and dissemination:** The SENECA trial, supported by IRST, was authorised by  
7  
8  
9 71 the locals Ethics Committee and the Italian Medicines Agency (AIFA). Results will be  
10  
11 72 widely disseminated via peer-reviewed manuscripts, conference presentations and  
12  
13 73 reports to relevant authorities.  
14  
15

16 74

17  
18 75 The study is currently open in Italy. Clinical trial registration: NCT03387592.  
19

20 76

21  
22 77 **Keywords:** neuroendocrine carcinoma, second-line, FOLFIRI, capecitabine,  
23  
24 78 temozolomide, CAPTEM  
25  
26

27 79 **Strengths and limitations of the study**  
28

- 29 80
- 31 81 • the SENECA trial randomises patients to receive two different treatments,  
32 FOLFIRI or CAPTEM, providing important information on the activity of both  
33 82 combinations in different NEC subtypes (NET grade (G) 3 and NEC G3).  
34  
35 83 • The SENECA trial analyses the role of miRNAs and other biological markers as  
36  
37 84 prognostic and predictive factors. A further aim is to assess <sup>68</sup>Ga-PET/CT as a  
38  
39 85 tool to improve current histological classification.  
40  
41 86

42  
43 86 The major limitations of the study are:  
44

- 45 87
- 46 87 • The rarity of the disease and patient prognosis. However, the involvement of  
47  
48 88 several Italian centres will hopefully help to overcome this problem.  
49  
50 89 • Poor prognosis of NEC patients. Patients progressing on platinum chemotherapy  
51  
52 90 usually have rapid deterioration of clinical conditions  
53  
54  
55  
56  
57  
58  
59  
60



92

## 93 **Introduction**

94 Poorly differentiated neuroendocrine carcinomas (NECs) are very rare malignancies,  
95 representing only 5%-10% of neuroendocrine neoplasias (NENs) (1-3). At the time of  
96 diagnosis, patients are generally in poor conditions due to aggressive and diffuse  
97 disease. These tumors are characterised by aggressive histological features (high Ki-67  
98 index, extensive necrosis, and nuclear atypia) and are classified as grade (G) 3 NECs  
99 according to the 2010 World Health Organization (WHO) classification (4). The 2017  
100 WHO classification recognized a further group called G3 NETs as having intermediate  
101 features between NETs and NECs (5).

102 An etoposide-platinum combination is the gold standard for the treatment of G3  
103 NECs, several studies published in the 1990s reporting substantial anti-tumor activity  
104 and high response rates (41%-67%) (6). However, prognosis is generally poor with a  
105 median progression-free survival (PFS) of 9 months and a median overall survival (OS)  
106 of 15-19 months. When progression occurs after first-line chemotherapy, the disease is  
107 usually very aggressive and patients succumb rapidly (7).

108 Given the rarity of this disease, prospective clinical data are lacking and treatment  
109 recommendations are essentially expert-based opinions. Two phase II studies  
110 investigating the second-line treatment of GEP-NECs are currently registered at  
111 *ClinicalTrials.gov*, one evaluating the safety and tolerability of everolimus in  
112 40 patients with G3 NEC/NET or G1/G2 NET switching to G3 NEN (National Clinical  
113 Trial identifier NCT02113800) and the other investigating the efficacy of avelumab  
114 (NCT03147404). A French study focusing on the identification of predictive molecular  
115 markers of response to sunitinib in poorly differentiated digestive NETs

1  
2  
3  
4 116 (NCT01215578) has now closed recruitment and results are eagerly awaited. Another  
5  
6 117 French multicentre prospective phase II trial is currently ongoing to investigate the  
7  
8 118 efficacy of the bevacizumab-FOLFIRI combination after progression on a  
9  
10  
11 119 platinum/etoposide combination (7).

12  
13 120 Different second-line chemotherapy combinations have been evaluated but shown  
14  
15 121 poor results (8-10). In a monocentre retrospective clinical trial, Hentic et al.  
16  
17 122 hypothesised the potential efficacy of FOLFIRI as second-line chemotherapy in  
18  
19 123 19 patients with G3 extra-pulmonary NECs (11). An objective response rate was  
20  
21 124 obtained in 31% of patients, with a disease control rate (DCR) of 62%. Median PFS  
22  
23 125 and OS were 4 and 18 months, respectively.

24  
25  
26  
27 126 In another retrospective study, a 71% DCR was obtained with temozolomide-based  
28  
29 127 chemotherapy in 25 patients with metastatic poorly differentiated endocrine carcinoma  
30  
31 128 of different sites and atypical bronchial carcinoid with Ki-67 > 20%. Small cell lung  
32  
33 129 carcinoma and large cell lung carcinoma were excluded. A PFS of 12 months (95%  
34  
35 130 confidence interval [CI], 5.5- 24) and OS of 22 months (95% CI, 12-31) were reported  
36  
37 131 in patients who responded to treatment or showed stable disease (SD), whereas OS was  
38  
39 132 only 8 months (95% CI, 0-8) in non-responders. The authors observed a higher response  
40  
41 133 rate in patients with Ki-67 ≤ 60%. There were also more responders in the group with  
42  
43 134 high uptake in somatostatin receptor scintigraphy (SRS) and in those with positive  
44  
45 135 staining for chromogranin A. Both factors are often associated with more highly  
46  
47 136 differentiated tumours (12).

48  
49  
50  
51  
52 137 Literature data on lung NECs in progression after first-line chemotherapy are based  
53  
54 138 on small patient series (13). Moreover, there is increasing evidence of some  
55  
56  
57 139 discrepancies in the current grading of NECs, highlighting the need for more accurate  
58  
59  
60

1  
2  
3  
4 140 biomarkers (4, 5). Recent research has shown that NECs may, in fact, comprise two  
5  
6 141 distinct subgroups with different pathogenesis, *i.e.* a highly proliferative group derived  
7  
8 142 from well differentiated neuroendocrine tumours (NETs) and characterised by  
9  
10 143 mutations in MEN1, DAXX and ATRX, and a poorly differentiated group derived from  
11  
12 144 neuroendocrine-differentiated adenocarcinomas and characterised by a mutation in  
13  
14 145 RB1. Both subgroups display a distinct prognosis and different sensitivity to  
15  
16 146 chemotherapy (14-16). Micro(mi)RNAs are a class of small, non-coding, highly  
17  
18 147 conserved single-stranded RNAs involved in the post-transcriptional regulation of cell  
19  
20 148 proliferation, differentiation, survival, and apoptosis (17). They are often associated  
21  
22 149 with resistance to therapy (18, 19). Whilst miRNAs are known to show a specific  
23  
24 150 expression pattern in NETs (20), little is known about differential miRNA profiles in  
25  
26 151 NEC patients. At present, no data are available on the deregulation of specific miRNAs  
27  
28 152 in this setting.

29  
30  
31  
32  
33  
34 153 In a study recently published by our group on GEP-NEC patients undergoing  
35  
36 154 first-line platinum-based chemotherapy, median PFS was 19.3 months and 6.3 months  
37  
38 155 ( $p < 0.01$ ) in patients with Ki-67 value between 20% and 50% or  $>50\%$ , respectively  
39  
40 156 (19). Median (m)OS was 8.1 months in the latter group but was not reached in the  
41  
42 157 former group ( $p = 0.039$ ). Patients with a positive  $^{68}\text{Ga}$ -PET/CT had a higher 18-month  
43  
44 158 OS rate than those with a negative scan (75% vs. 34.3%, respectively), but the  
45  
46 159 difference was not statistically significant ( $p = 0.06$ ). Our data highlighted that  $^{68}\text{Ga}$ -  
47  
48 160 PET/CT positivity may be a discriminating factor (16, 21) in predicting prognosis,  
49  
50 161 especially ~~important~~ in the metastatic setting where histological material is not always  
51  
52 162 available for evaluation. Furthermore,  $^{18}\text{F}$ fludeoxyglucose ( $^{18}\text{F}$ FDG)-PET/CT may be  
53  
54 163 useful to discriminate between patients with different prognosis (22).  
55  
56  
57  
58  
59  
60

1  
2  
3  
4 164 Given the above premises, we decided to investigate the efficacy and safety of  
5  
6 165 second-line FOLFIRI or CAPTEM in patients with GEP and lung NECs in progression  
7  
8  
9 166 after first-line platinum-based treatment. We also aimed to study the serum miRNA  
10  
11 167 profile in relation to the primary mutational status of MEN1, DAXX, ATRX and RB-1,  
12  
13 168 patient prognosis and response to therapy, and to assess the prognostic and predictive  
14  
15 169 role of <sup>18</sup>F-FDG-PET/CT, <sup>68</sup>Ga-PET/CT and Ki-67 score.  
16  
17  
18  
19  
20  
21  
22

## 23 172 **Methods and Analysis**

### 24 173 **Study design**

25  
26 174 The SENECA study is a multicentre randomised non-comparative phase II study  
27  
28  
29 175 (Figure 1). Patients with metastatic neuroendocrine carcinomas of different origin  
30  
31 176 (lung or gastroenteropancreatic) in progression after first-line treatment are randomized  
32  
33 177 to receive FOLFIRI every 14 days for a maximum of 12 cycles or until progression or  
34  
35 178 unacceptable toxicity, or CAPTEM every 28 days for a maximum of 6 cycles or until  
36  
37 179 progression or unacceptable toxicity.  
38  
39  
40  
41

42 180 The treatment arms are as follows:  
43  
44  
45  
46

### 47 182 **FOLFIRI regimen**

- 48 183 • Irinotecan 180 mg/m<sup>2</sup>, given as a 60-min. intravenous (i.v.) infusion on day 1 every  
49  
50 184 2 weeks followed by
- 51  
52 185 • Leucovorin 200 mg/m<sup>2</sup>, given as a 2-h i.v. infusion on day 1 every 2 weeks followed  
53  
54  
55 186 by
- 56  
57  
58  
59  
60

- 1  
2  
3  
4 187 • 5-fluorouracil (5-FU) 400 mg/m<sup>2</sup> given as bolus, and then 5-FU 2400 mg/m<sup>2</sup> given  
5  
6 188 as a 48-h continuous infusion on day 1, every 2 weeks, until progression or for a  
7  
8 189 maximum of 12 cycles.

10  
11 190

### 13 191 CAPTEM regimen

16 192 Capecitabine 750 mg/m<sup>2</sup> twice a day on days 1-14 in combination with temozolomide  
17  
18 193 200 mg/m<sup>2</sup> daily on days 10-14, every 4 weeks, until progression or for a maximum of  
19  
20 194 6 cycles.

23 195 The study includes patients aged  $\geq 18$  years with a histological diagnosis of G3  
24  
25 196 neuroendocrine carcinoma (GEP-NEC and lung NEC) according to the 2010 and 2015  
26  
27 197 GEP and Lung NEN WHO classifications, respectively, Ki-67  $>20\%$  and measurable  
28  
29 198 disease according to Response Evaluation Criteria In Solid Tumors (RECIST) 1.1 criteria.  
30  
31 199 All patients must have an Eastern Cooperative Oncology Group (ECOG) performance  
32  
33 200 status  $\leq 2$  with a life expectancy  $> 3$  months and must have already undergone first-line  
34  
35 201 treatment for metastatic disease with platinum -based chemotherapy  
36  
37 202 (cisplatin/carboplatin and etoposide, FOLFOX4 or CAPOX). Adequate haematological,  
38  
39 203 liver and renal function is required and effective contraceptive methods must be used by  
40  
41 204 female patients of childbearing age. Written informed consent is obtained from all  
42  
43 205 patients to take part in the study. Exclusion criteria are as follows: metastatic NECs  
44  
45 206 previously treated with an irinotecan or temozolomide regimen, known hypersensitivity  
46  
47 207 to 5-FU/capecitabine, calcium levofolinate, irinotecan or their recipients. All acute  
48  
49 208 toxic effects of any prior therapy (including surgery, radiation therapy and  
50  
51 209 chemotherapy) must have resolved to grade  $\leq 1$  according to National Cancer Institute  
52  
53 210 Common Terminology Criteria for Adverse Events version 4.03 (CTCAE). Patients  
54  
55  
56  
57  
58  
59  
60

1  
2  
3  
4 211 taking part in another clinical trial with any investigational agent < 30 days prior to  
5  
6 212 study screening or with a history of allergic reactions attributable to compounds of  
7  
8 213 similar chemical or biological composition are excluded. Patients who have undergone  
9  
10 214 chemotherapy or radiotherapy < 4 weeks (6 weeks for nitrosoureas or mitomycin C)  
11  
12 215 prior to entering the study, have not recovered from adverse events caused by agents  
13  
14 216 administered > 4 weeks earlier, or have known brain metastases are also not eligible for  
15  
16 217 the study. Patients with other malignancies with a disease-free interval of < 5 years  
17  
18 218 (with the exception of non melanoma skin cancer or low-grade superficial bladder  
19  
20 219 cancer) are excluded, as are those with any severe and/or uncontrolled medical  
21  
22 220 condition or other condition that could affect their participation in the study such as:  
23  
24  
25 221 • unstable angina pectoris, symptomatic congestive heart failure, myocardial infarction  
26  
27 222 < 6 months before the start of the study, serious uncontrolled cardiac arrhythmia or  
28  
29 223 any other clinically significant cardiac disease;  
30  
31 224 • severely impaired lung function (spirometry and DLCO 50% of the normal predicted  
32  
33 225 value and/or oxygen saturation  $\leq$  88% at rest, in room air);  
34  
35 226 • uncontrolled diabetes as defined by fasting serum glucose >1.5 x upper limit of  
36  
37 227 normal;  
38  
39 228 • any active (acute or chronic) or uncontrolled infections/disorders.  
40  
41  
42  
43 229 Tumour evaluation by anatomic imaging (multiphase CT and/or MRI) includes chest,  
44  
45 230 abdomen, pelvis, and any additional known sites of disease. These tests are performed  
46  
47 231 at baseline, every three months during treatment and after the end of treatment in  
48  
49 232 non-progressing patients until progression. When possible,  $^{68}\text{Ga}$ -PET/CT and  $^{18}\text{F}$ FDG-  
50  
51 233 PET/CT are performed at baseline. An EORTC quality of life questionnaire is  
52  
53 234 administered at baseline and every three months thereafter during the treatment period.  
54  
55  
56  
57  
58  
59  
60

235

## 236 Study endpoints

237 The primary endpoint of the study is the DCR of each treatment, defined as the  
238 percentage of patients who have achieved complete or partial response or stable disease  
239 for  $\geq 12$  weeks from the start of therapy. DCR will be evaluated using the new  
240 international criteria proposed by the RECIST version 1.1. Acute and late toxicity will  
241 be assessed by CTCAE Version 4.03, the latter defined as toxicity occurring at least  
242 30 days after the end of the last treatment cycle. Secondary endpoints are OS, calculated  
243 from the start of treatment to death from any cause, and PFS, calculated from the start of  
244 treatment to the date of the first documented evidence of disease progression or of death  
245 from any cause. All the analyses will be performed in the intention-to-treat population.  
246 Patients without events at the time of analysis will be censored at their last-known-alive  
247 date for OS and at their last date of tumour evaluation for PFS. A further secondary  
248 endpoint is the evaluation of quality of life using the European Organization for the  
249 Research and Treatment of Cancer Quality of Life Questionnaire (EORTC QLQ-C30).  
250 When data are available, the impact of baseline  $^{68}\text{Ga}$ -PET/CT and  $^{18}\text{F}$ FDG-PET/CT on  
251 PFS will be analysed with exploratory intent. After signing the informed consent for  
252 biomarker assessment, patients will undergo evaluation of the mutation status of MEN1,  
253 DAXX, ATRX and RB-1 in primary tumour tissue and of miRNA in blood samples.  
254 Assessment of the miRNA profile will be performed on the first 20 patients who agree  
255 to participate in the biological part of the study.

256

## 257 Ethical considerations

1  
2  
3  
4 258 The present clinical trial (EudraCT 2016-000767-17), supported by IRST, was  
5  
6 259 authorised by the local Ethics Committee and by the Italian Medicines Agency (AIFA).  
7  
8  
9 260 The study is also registered on the *ClinicalTrials.gov* website (NCT03387592). The  
10  
11 261 study complies with the ethical standards laid down in the 1964 Declaration of Helsinki  
12  
13 262 and the principles of Good Clinical Practice guidelines (including written informed  
14  
15  
16 263 consent).

#### 19 264 Patient and public involvement

21 265 This research work was performed without patient involvement in the study design,  
22  
23 266 execution or outcome measures.  
24  
25  
26  
27 267

#### 29 268 Statistical methods

31 269 The Bryant and Day design is used to estimate a sample size that takes into account  
32  
33 270 both treatment activity and toxicity. Although randomisation is used to allocate patients  
34  
35 271 to the two arms, no formal statistical comparisons between treatment regimens are  
36  
37 272 planned. The purpose of randomisation is to reduce bias due to patient assignment to a  
38  
39 273 specific treatment arm. The hypothesis for the control arm is based on literature data  
40  
41 274 (23, 24).

43  
44  
45 275 An  $\alpha$  level of 0.10 (both for toxicity and DCR) and a power of 90% have been  
46  
47 276 adopted. A DCR rate  $\geq 60\%$  and a relevant toxicity rate  $\leq 20\%$  are considered acceptable  
48  
49 277 rates, while a DCR rate  $\leq 40\%$  and a relevant toxicity rate  $\geq 40\%$  are considered  
50  
51 278 unacceptable rates. Given these hypotheses, the first step of the study will require  
52  
53 279 25 patients. If  $\geq 10$  patients with a DCR are observed and  $\geq 15$  patients do not have  
54  
55 280 significant toxicity, the study will enrol patients in the next step. A total of 53 patients  
56  
57  
58  
59  
60



1  
2  
3  
4 281 will be enrolled. If  $\geq 25$  patients with DCR and  $\geq 36$  patients without any relevant  
5  
6 282 toxicity are observed, treatment will be considered active and not toxic. This design is  
7  
8  
9 283 used for each treatment scheme and all analyses will be performed separately. If one of  
10  
11 284 the schemes does not obtain the expected proportions of the first step, the arm will be  
12  
13 285 closed and patients will be enrolled in the other arm until the target is reached; if the  
14  
15 286 expected proportions are not reached in any arm, the study will be prematurely closed.  
16  
17  
18 287 If no premature stop occurs, a total of 106 evaluable patients are needed (53 patients in  
19  
20 288 each arm). Taking into account a 5% dropout rate, 56 patients must be enrolled in each  
21  
22 289 arm (total 112 patients). G3-4 gastrointestinal toxicity, G4 thrombocytopenia,  
23  
24 290 prolonged G3-G4 neutropenia ( $> 7$  days) and drug-related hospitalisations are  
25  
26 291 considered relevant toxicity. The stratification factors of this study are Ki-67 (21%-55  
27  
28 292 % vs.  $> 55\%$ ) and site of primary tumour (lung vs. GEP).  
29  
30  
31

32 293 Complete response, partial response or stable disease for at least 12 weeks will be  
33  
34 294 considered as the DCR. The proportion of patients in this category will be determined  
35  
36 295 and 95% CIs for the DCR will be calculated. OS and PFS will be estimated using the  
37  
38 296 Kaplan-Meier method (two-sided 95% CIs) (24). Appropriate statistical analyses will be  
39  
40 297 performed on the basis of the data available to compare QLQ-C30 scores between  
41  
42 298 baseline and subsequent follow-up visits.  
43  
44

45 299 When data are available, the impact of  $^{68}\text{Ga}$ -PET/CT result on PFS will be analysed  
46  
47 300 with exploratory intent. The Shapiro-Wilk test will be used to determine the normality  
48  
49 301 distribution of each clinical, demographic and biological biomarker (25). In the event  
50  
51 302 of a non-normal distribution, nonparametric statistics will be used to analyse the  
52  
53 303 relationship between the serum levels of each marker, considered as continuous  
54  
55 304 variables, and response to treatment. In the event of normal biomarker distribution,  
56  
57  
58  
59  
60

1  
2  
3  
4 305 a parametric test will be used. All endpoints will be analysed separately for each  
5  
6 306 treatment group.

7  
8  
9 307 **Discussion**

10  
11 308 There is still no truly effective second-line chemotherapy for neuroendocrine  
12  
13 309 carcinoma. Overall prognosis of patients is poor, with an OS of 5 months in the  
14  
15 310 metastatic setting according to SEER (Surveillance, Epidemiology, and End Results)  
16  
17 311 data (26). Only 5% of all patients are long-term survivors. There is also a marked lack  
18  
19 312 of prognostic and predictive factors (5).

20  
21  
22  
23 313 Three phase II studies registered at *ClinicalTrials.gov* are currently investigating  
24  
25 314 second-line treatment of GEP-NECs, the first focusing on FOLFIRI and bevacizumab  
26  
27 315 (NCT02820857), the second on everolimus (NCT02113800) and the third on avelumab  
28  
29 316 (NCT03147404). Some abstracts were presented at ESMO (European Society for  
30  
31 317 Medical Oncology) 2018 and ASCO ( American Society of Clinical Oncology ) 2019  
32  
33 318 on the use of immunotherapy in GEP-NECs, all showing inconclusive results. The  
34  
35 319 SENECA study uses a promising approach to the treatment of patients with metastatic  
36  
37 320 NECs. First, both the activity and safety of 2 regimens are assessed in the same setting  
38  
39 321 with a sizeable patient population (56 patients/arm). In addition, patients are stratified  
40  
41 322 according to Ki-67 index and morphology to investigate the role of each treatment  
42  
43 323 combination in both poorly differentiated and well differentiated NECs. Another aim of  
44  
45 324 this study is to integrate both biological and metabolic imaging data in an effort to  
46  
47 325 improve the current GEP-NEC classification.

48  
49  
50  
51  
52  
53 326 In conclusion, there are still no FDA/EMA (Food and Drug Administration/European  
54  
55 327 Medicines Agency)-approved second-line therapeutic options for patients with  
56  
57 328 metastatic NECs, and the SENECA trial could represent a step forward in finding novel  
58  
59  
60

1  
2  
3  
4 329 therapies to prolong survival and maintain quality of life. Moreover, the integration of  
5  
6 330 biological and imaging data could -lead to a better understanding of the natural history  
7  
8  
9 331 of the disease and help to identify potential responders.

10 332

11 333

### 12 334 **Confidentiality**

13  
14  
15  
16 335 This study will be conducted in full conformity with ICH (The International Council for  
17  
18 336 Harmonisation of Technical Requirements for Pharmaceuticals for Human Use)  
19  
20 337 Guidelines for Good Clinical Practice, Directive 2001/20/EEC of the European  
21  
22  
23 338 Parliament and other relevant current local legislation. Participants will be allocated a  
24  
25 339 unique identification (ID) number at entry. The master list linking participant personal  
26  
27 340 information and ID number will be maintained in a separate locked cabinet and  
28  
29 341 password-protected hard-drive. Data will be analysed by ID number only. Patient files  
30  
31  
32 342 and other source data will for be kept a maximum of 15 years.  
33  
34  
35

36 343

### 37 344 **Dissemination**

38  
39  
40 345 After completing the study, all data, including beneficial and adverse events, of the trial  
41  
42 346 will be communicated at scientific meetings and published in indexed peer-reviewed  
43  
44 347 journals. If shown to be effective, the therapy program will be made available to the  
45  
46 348 general public in an appropriate manner.  
47  
48  
49

50 349

51 350

52 351

53 352

54  
55  
56  
57  
58  
59  
60

1  
2  
3  
4 353 **Abbreviations**  
5

6 354 CAPTEM, capecitabine plus temozolomide; DCR, disease control rate; GEP,  
7  
8 355 gastroenteropancreatic; NEC, neuroendocrine carcinoma; NET, neuroendocrine tumour;  
9  
10 356 OS, overall survival; PFS, progression-free survival  
11  
12  
13

14 357

15  
16 358 **Author contributions**  
17

18 359 AB, CL and TI designed the study and drafted the article. AB was responsible for data  
19  
20 360 acquisition. SP, SL, GDM, SS and ST provided methodological support and designed a  
21  
22 361 clinical information data extraction method for the protocol. FF performed the statistical  
23  
24 362 analysis. DS, FG, FP, RB, IL, FB and SR revised the paper for important intellectual  
25  
26 363 content. All authors read and approved the present version of the manuscript for  
27  
28 364 submission.  
29  
30

31  
32 365

33  
34 366 **Data availability statement**  
35

36 367 The datasets used and analysed in the present study are available from the  
37  
38 368 corresponding author on reasonable request.  
39  
40

41 369

42  
43 370 **Funding**  
44

45 371 The study was conducted in the absence of any commercial or financial relationships  
46  
47 372 that could be construed as a potential conflict of interest.  
48  
49

50 373

51  
52 374 **Conflicts of interest**  
53

54 375 The authors declare no conflict of interest.  
55  
56

57 376  
58  
59  
60

1  
2  
3  
4 377 **Acknowledgements**

5  
6 378 *SENECA study Team investigators*: Davide Campana, Davide Pastorelli, Nicola  
7  
8  
9 379 Silvestris, Francesco Silvestris, Angela Buonadonna and Giuseppe Badalamenti.  
10  
11 380 The authors thank Gráinne Tierney and Cristiano Verna for editorial assistance.  
12  
13  
14 381

15  
16 382 **References**

- 17  
18 383 1. Kulke MH, Shah MH, Benson AB 3<sup>rd</sup>, Bergsland E, Berlin JD, Blaszkowsky LS, et  
19  
20 384 al. Neuroendocrine tumors, version 1.2015. *J Natl Compr Canc Netw* (2015)  
21  
22 385 13(1):78-108  
23  
24  
25 386 2. Modlin IM, Moss SF, Chung DC, Jensen RT, Snyderwine E. Priorities for  
26  
27 387 improving the management of gastroenteropancreatic neuroendocrine tumors. *J*  
28  
29 388 *Natl Cancer Inst* (2008)100(18):1282-9. doi: 10.1093/jnci/djn275  
30  
31  
32 389 3. Yao YC, Hassan M, Phan A, Dagohoy C, Leary C, Mares JE, et al. One hundred  
33  
34 390 years after “carcinoid”: epidemiology of and prognostic factors for neuroendocrine  
35  
36 391 tumors in 35,825 cases in the United States. *J Clin Oncol* (2008) 26(18):3063-72  
37  
38  
39 392 4. Fraenkel M, Kim M, Faggiano A, de Herder WW, Valk GD; Knowledge NETwork.  
40  
41 393 Incidence of gastroenteropancreatic neuroendocrine tumours: a systematic review  
42  
43 394 of the literature. *Endocr Relat Cancer* (2014) 21(3):R153-63. doi: 10.1530/ERC-  
44  
45 395 13-0125  
46  
47  
48 396 5. Lloyd RV, Osamura RY, Klöppel G, Rosai J. WHO classification of tumours of  
49  
50 397 endocrine organs. 4th ed (2017). Lyon: International Agency for Research on  
51  
52 398 Cancer (IARC)  
53  
54  
55 399 6. Sorbye H, Welin S, Langer SW, Vestermark LW, Holt N, Osterlund P, et al.  
56  
57 400 Predictive and prognostic factors for treatment and survival in 305 patients with

- 1  
2  
3  
4 401 advanced gastrointestinal neuroendocrine carcinoma (WHO G3): the NORDIC  
5  
6 402 NEC study. *Ann Oncol* (2013) 24(1):152-60.  
7  
8  
9 403 7. Heetfeld M, Chougnnet CN, Olsen IH, Rinke A, Borbath I, Crespo G, et al.  
10  
11 404 Characteristics and treatment of patients with G3 gastroenteropancreatic  
12  
13 405 neuroendocrine neoplasms. *Endocr Relat Cancer* (2015) 22(4):657-64. doi:  
14  
15 406 10.1530/ERC-15-0119  
16  
17  
18 407 8. Walter T, Malka D, Hentic O, Lombard-Bohas C, Le Malicot K, Smith D, et al.  
19  
20 408 Evaluating bevacizumab in combination with FOLFIRI after the failure of  
21  
22 409 platinum-etoposide regimen in patients with advanced poorly  
23  
24 410 differentiated neuroendocrine carcinoma: The PRODIGE 41-BEVANEC  
25  
26 411 randomized phase II study. *Dig Liver Dis* (2018) 50(2):195-8. doi:  
27  
28 412 10.1016/j.dld.2017.11.020  
29  
30  
31  
32 413 9. Hadoux J, Malka D, Planchard D, Scoazec JY, Caramella C, Guigay J, et al. Post-  
33  
34 414 first-line FOLFOX chemotherapy for grade 3 neuroendocrine carcinoma. *Endocr*  
35  
36 415 *Relat Cancer* (2015) 22(3):289-98. doi: 10.1530/ERC-15-0075  
37  
38  
39 416 10. Olsen IH, Sørensen JB, Federspiel B, Kjaer A, Hansen CP, Knigge U, et al.  
40  
41 417 Temozolomide as second or third line treatment of patients with neuroendocrine  
42  
43 418 carcinomas. *Sci World J* (2012) 2012;2012:170496. doi: 10.1100/2012/170496  
44  
45  
46 419 11. Hentic O, Hammel P, Couvelard A, Rebours V, Zappa M, Palazzo M, et al.  
47  
48 420 FOLFIRI regimen: an effective second-line chemotherapy after failure of  
49  
50 421 etoposide-platinum combination in patients with neuroendocrine carcinomas grade  
51  
52 422 3. *Endocr Relat Cancer* (2012) 9(6):751-7. doi: 10.1530/ERC-12-0002  
53  
54  
55 423 12. Welin S, Sorbye H, Sebjornsen S, Knappskog S, Busch C, Oberg K. Clinical  
56  
57 424 effect of temozolomide-based chemotherapy in poorly differentiated endocrine  
58  
59  
60

- 1  
2  
3  
4 425 carcinoma after progression on first-line chemotherapy. *Cancer* (2011)  
5  
6 426 117(20):4617-22. doi: 10.1002/cncr.26124  
7  
8  
9 427 13. Noda K, Nishiwaki Y, Kawahara M, Negoro S, Sugiura T, Yokoyama A, et al.  
10  
11 428 Irinotecan plus cisplatin compared with etoposide plus cisplatin for extensive small-  
12  
13 429 cell lung cancer. *N Engl J Med* (2002) 346(2):85-91. doi: 10.1056/NEJMoa003034  
14  
15  
16 430 14. Derks JL, Leblay N, Thunnissen E, van Suylen RJ, den Bakker M, Groen  
17  
18 431 HJM, et al. Molecular subtypes of pulmonary large-cell neuroendocrine carcinoma  
19  
20 432 predict chemotherapy treatment outcome. *Clin Cancer Res* (2018) 24(1):33-42. doi:  
21  
22 433 10.1158/1078-0432.CCR-17-1921  
23  
24  
25 434 15. Tang LH, Untch BR, Reidy DL, O'Reilly E, Dhall D, Jih L, et al. Well-  
26  
27 435 differentiated neuroendocrine tumors with a morphologically apparent high-grade  
28  
29 436 component: a pathway distinct from poorly differentiated neuroendocrine  
30  
31 437 carcinomas. *Clin Cancer Res* (2016) 22(4):1011-7. doi: 10.1158/1078-0432.CCR-  
32  
33 438 15-0548  
34  
35  
36 439 16. Liverani C, Bongiovanni A, Mercatali L, Foca F, Pieri F, De Vita A, Spadazzi  
37  
38 440 C, Miserocchi G, Recine F, Riva N, Nicolini S, Severi S, Martinelli G, Ibrahim T.  
39  
40 441 Grading of Neuroendocrine Carcinomas: Correlation of 68Ga-PET/CT Scan with  
41  
42 442 Tissue Biomarkers. *Dis Markers*. 2018 Dec 2;2018:6878409.  
43  
44  
45 443 17. Grolmusz VK, Kövesdi A, Borcs K, Igaz P, Patócs A. Prognostic relevance of  
46  
47 444 proliferation-related miRNAs in pancreatic neuroendocrine neoplasms *Eur J*  
48  
49 445 *Endocrinol* (2018) 179(4):219-28. doi: 10.1530/EJE-18-0305  
50  
51  
52 446 18. Gill P, Kim E, Chua TC, Clifton-Bligh RJ, Nahm CB, Mittal A, et al. MiRNA-3653  
53  
54 447 is a potential tissue biomarker for increased metastatic risk in pancreatic  
55  
56 448 neuroendocrine tumours. *Endocr Pathol* (2019). doi: 10.1007/s12022-019-9570-y  
57  
58  
59  
60

- 1  
2  
3  
4 449 [Epub ahead of print]  
5  
6 450 19. Panarelli N, Tyryshkin K, Wong JJM, Majewski A, Yang X, Scognamiglio T, et al.  
7  
8  
9 451 Evaluating gastroenteropancreatic neuroendocrine tumors through microRNA  
10  
11 452 sequencing. *Endocr Relat Cancer* (2019) 26(1):47-57. doi: 10.1530/ERC-18-0244  
12  
13 453 20. Malczewska A, Kidd M, Matar S, Kos-Kudla B, Modlin IM. A comprehensive  
14  
15 454 assessment of the role of mirnas as biomarkers in gastroenteropancreatic  
16  
17 455 neuroendocrine tumors. *Neuroendocrinology* (2018)107(1):73-90. doi:  
18  
19 456 10.1159/000487326  
20  
21  
22 457 21. Bongiovanni A, Riva N, Ricci M, Liverani C, La Manna F, De Vita A, et al. First-  
23  
24 458 line chemotherapy in patients with metastatic gastroenteropancreatic  
25  
26 459 neuroendocrinecarcinoma. *Onco Targets Ther* (2015) 8:3613-9. doi:  
27  
28 460 10.2147/OTT.S91971  
29  
30  
31 461 22. Sansovini M, Severi S, Ianniello A, Nicolini S, Fantini L, Mezzenga E, Ferroni F,  
32  
33 462 Scarpi E, Monti M, Bongiovanni A, Cingarlini S, Grana CM, Bodei L, Paganelli G.  
34  
35 463 Long-term follow-up and role of  
36  
37 464 FDG PET in advanced pancreatic neuroendocrine patients treated with 177Lu-D  
38  
39 465 OTATATE. *Eur J Nucl Med Mol Imaging*. 2017 Mar;44(3):490-499.  
40  
41  
42 466 23. Sorbye H, Welin S, Langer SW, Vestermarck LW, Holt N, Osterlund P, et al.  
43  
44 467 Predictive and prognostic factors for treatment and survival in 305 patients with  
45  
46 468 advanced Gastrointestinal neuroendocrine carcinoma (WHO G3):  
47  
48 469 the NORDIC NEC study. *Ann Oncol* (2013) 24(1):152-60. doi:  
49  
50 470 10.1093/annonc/mds276  
51  
52  
53 471 24. Perren A, Couvelard A, Scoazec JY, Costa F, Borbath I, Delle Fave G, et al.  
54  
55 472 ENETS consensus guidelines for the standards of care in neuroendocrine tumors:  
56  
57  
58  
59  
60



- 1  
2  
3  
4 473 pathology: diagnosis and prognostic stratification. *Neuroendocrinology* (2017)  
5  
6 474 105(3):196-200. doi: 10.1159/000457956  
7  
8  
9 475 25. Sorbye H, Köhne CH, Sargent DJ, Glimelius B. Patient characteristics and  
10  
11 476 stratification in medical treatment studies for metastatic colorectal cancer: a  
12  
13 477 proposal for standardization of patient characteristic reporting and stratification.  
14  
15  
16 478 *Ann Oncol* (2007) 18(10):1666-72.  
17  
18 479 26. Kaplan EL, Meier P. Nonparametric estimation from incomplete observations.  
19  
20 480 *J. Amer. Statist Assoc* (1958) 53:457-81.  
21  
22  
23 481  
24  
25 482  
26  
27 483  
28  
29 484  
30  
31 485  
32  
33 486  
34  
35 487  
36  
37 488  
38  
39 489  
40  
41 490  
42  
43 491  
44  
45 492  
46  
47 493  
48  
49  
50  
51  
52  
53  
54  
55  
56  
57  
58  
59  
60

1  
2  
3  
4 495  
5

6 **Figure legend**  
7

8  
9 **FIGURE 1** | SENECA study design.  
10

11 498  
12  
13  
14  
15  
16  
17  
18  
19  
20  
21  
22  
23  
24  
25  
26  
27  
28  
29  
30  
31  
32  
33  
34  
35  
36  
37  
38  
39  
40  
41  
42  
43  
44  
45  
46  
47  
48  
49  
50  
51  
52  
53  
54  
55  
56  
57  
58  
59  
60

For peer review only

1  
2  
3  
4  
5  
6  
7  
8  
9  
10  
11  
12  
13  
14  
15  
16  
17  
18  
19  
20  
21  
22  
23  
24  
25  
26  
27  
28  
29  
30  
31  
32  
33  
34  
35  
36  
37  
38  
39  
40  
41  
42  
43  
44  
45  
46  
47  
48  
49  
50  
51  
52  
53  
54  
55  
56  
57  
58  
59  
60

Fig. 1

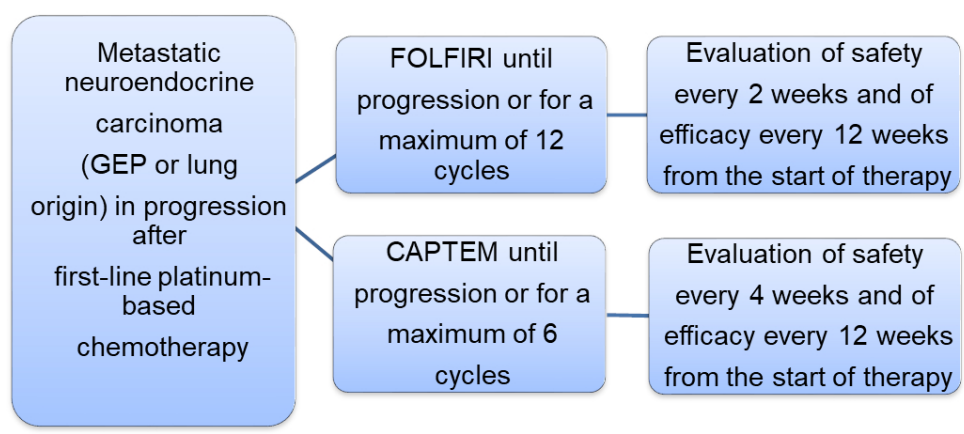

FIGURE 1 | SENECA study design.

90x91mm (300 x 300 DPI)

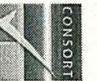

# CONSORT 2010 checklist of information to include when reporting a randomised trial\*

| Section/Topic      | Item No | Checklist item                                                                                                                                                                              | Reported on page No |
|--------------------|---------|---------------------------------------------------------------------------------------------------------------------------------------------------------------------------------------------|---------------------|
| Title and abstract | 1a      | Identification as a randomised trial in the title                                                                                                                                           | 1                   |
|                    | 1b      | Structured summary of trial design, methods, results, and conclusions (for specific guidance see CONSORT for abstracts)                                                                     | 3                   |
| Introduction       | 2a      | Scientific background and explanation of rationale                                                                                                                                          | 5-7                 |
|                    | 2b      | Specific objectives or hypotheses                                                                                                                                                           | 7                   |
| Methods            | 3a      | Description of trial design (such as parallel, factorial) including allocation ratio                                                                                                        | 8-11                |
|                    | 3b      | Important changes to methods after trial commencement (such as eligibility criteria), with reasons                                                                                          | not applicable      |
|                    | 4a      | Eligibility criteria for participants                                                                                                                                                       | 9                   |
|                    | 4b      | Settings and locations where the data were collected                                                                                                                                        | 14-15               |
|                    | 5       | The interventions for each group with sufficient details to allow replication, including how and when they were actually administered                                                       | 8, 9                |
| Outcomes           | 6a      | Completely defined pre-specified primary and secondary outcome measures, including how and when they were assessed                                                                          | 10, 11              |
|                    | 6b      | Any changes to trial outcomes after the trial commenced, with reasons                                                                                                                       | N/A                 |
|                    | 7a      | How sample size was determined                                                                                                                                                              | 12                  |
| Sample size        | 7a      | How sample size was determined                                                                                                                                                              | N/A                 |
|                    | 7b      | When applicable, explanation of any interim analyses and stopping guidelines                                                                                                                | 12                  |
|                    | 8a      | Method used to generate the random allocation sequence                                                                                                                                      | 12                  |
| Randomisation:     | 8a      | Method used to generate the random allocation sequence                                                                                                                                      | 12                  |
|                    | 8b      | Type of randomisation; details of any restriction (such as blocking and block size)                                                                                                         | 12                  |
| Allocation         | 9       | Mechanism used to implement the random allocation sequence (such as sequentially numbered containers), describing any steps taken to conceal the sequence until interventions were assigned | 12                  |
|                    | 10      | Who generated the random allocation sequence, who enrolled participants, and who assigned participants to interventions                                                                     | 12                  |
| Blinding           | 10      | Who generated the random allocation sequence, who enrolled participants, and who assigned participants to interventions                                                                     | 12                  |
|                    | 11a     | If done, who was blinded after assignment to interventions (for example, participants, care providers, those                                                                                | N/A                 |

1  
2  
3  
4  
5  
6  
7  
8  
9  
10  
11  
12  
13  
14  
15  
16  
17  
18  
19  
20  
21  
22  
23  
24  
25  
26  
27  
28  
29  
30  
31  
32  
33  
34  
35  
36  
37  
38  
39  
40  
41  
42  
43  
44  
45  
46  
47  
48  
49  
50  
51  
52  
53  
54  
55  
56  
57  
58  
59  
60

\_\_\_\_\_ N/A  
 \_\_\_\_\_ N/A  
 11b If relevant, description of the similarity of interventions  
 12a Statistical methods used to compare groups for primary and secondary outcomes  
 12b Methods for additional analyses, such as subgroup analyses and adjusted analyses  
 \_\_\_\_\_ 12, 13  
 \_\_\_\_\_ 12

**Results**  
 Participant flow (a diagram is strongly recommended) 13a For each group, the numbers of participants who were randomly assigned, received intended treatment, and were analysed for the primary outcome 8, 12  
 13b For each group, losses and exclusions after randomisation, together with reasons  
 \_\_\_\_\_ 12  
 Recruitment 14a Dates defining the periods of recruitment and follow-up  
 \_\_\_\_\_ N/A  
 14b Why the trial ended or was stopped  
 \_\_\_\_\_ N/A

Baseline data 15 A table showing baseline demographic and clinical characteristics for each group  
 \_\_\_\_\_ N/A  
 Numbers analysed 16 For each group, number of participants (denominator) included in each analysis and whether the analysis was by original assigned groups  
 \_\_\_\_\_ N/A

Outcomes and estimation 17a For each primary and secondary outcome, results for each group, and the estimated effect size and its precision (such as 95% confidence interval) 12  
 17b For binary outcomes, presentation of both absolute and relative effect sizes is recommended 12  
 Ancillary analyses 18 Results of any other analyses performed, including subgroup analyses and adjusted analyses, distinguishing pre-specified from exploratory 12

Harms 19 All important harms or unintended effects in each group (for specific guidance see CONSORT for harms)  
 \_\_\_\_\_

**Discussion**  
 Limitations 20 Trial limitations, addressing sources of potential bias, imprecision, and, if relevant, multiplicity of analyses 4  
 Generalisability 21 Generalisability (external validity, applicability) of the trial findings 13, 14  
 Interpretation 22 Interpretation consistent with results, balancing benefits and harms, and considering other relevant evidence 13, 14

**Other information**  
 Registration 23 Registration number and name of trial registry 13  
 Protocol 24 Where the full trial protocol can be accessed, if available 14, 15  
 Funding 25 Sources of funding and other support (such as supply of drugs), role of funders 16

\*We strongly recommend reading this statement in conjunction with the CONSORT 2010 Explanation and Elaboration for important clarifications on all the items. If relevant, we also recommend reading CONSORT extensions for cluster randomised trials, non-inferiority and equivalence trials, non-pharmacological treatments, herbal interventions, and pragmatic trials. Additional extensions are forthcoming: for those and for up to date references relevant to this checklist, see [www.consort-statement.org](http://www.consort-statement.org).

1  
2  
3  
4  
5  
6  
7  
8  
9  
10  
11  
12  
13  
14  
15  
16  
17  
18  
19  
20  
21  
22  
23  
24  
25  
26  
27  
28  
29  
30  
31  
32  
33  
34  
35  
36  
37  
38  
39  
40  
41  
42  
43  
44  
45  
46  
47  
48  
49  
50  
51  
52  
53  
54  
55  
56  
57  
58  
59  
60

1  
2  
3  
4  
5  
6  
7  
8  
9  
10  
11  
12  
13  
14  
15  
16  
17  
18  
19  
20  
21  
22  
23  
24  
25  
26  
27  
28  
29  
30  
31  
32  
33  
34  
35  
36  
37  
38  
39  
40  
41  
42  
43  
44  
45  
46  
47  
48  
49  
50  
51  
52  
53  
54  
55  
56  
57  
58  
59  
60

|    |                                                                                                                                                                                                                                                                                          |    |                            |
|----|------------------------------------------------------------------------------------------------------------------------------------------------------------------------------------------------------------------------------------------------------------------------------------------|----|----------------------------|
| 1  | Descriptive title identifying the study design, population, interventions, and, if applicable, trial acronym                                                                                                                                                                             | 1  | Title                      |
| 2  | Trial identifier and registry name. If not yet registered, name of intended registry                                                                                                                                                                                                     | 2a | Trial registration         |
| 3  | All items from the World Health Organization Trial Registration Data Set                                                                                                                                                                                                                 | 2b |                            |
| 4  | Date and version identifier                                                                                                                                                                                                                                                              | 3  | Protocol version           |
| 5  | Sources and types of financial, material, and other support                                                                                                                                                                                                                              | 4  | Funding                    |
| 6  | Names, affiliations, and roles of protocol contributors                                                                                                                                                                                                                                  | 5a | Roles and responsibilities |
| 7  | Name and contact information for the trial sponsor                                                                                                                                                                                                                                       | 5b |                            |
| 8  | Role of study sponsor and funders, if any, in study design, collection, management, analysis, and interpretation of data; writing of the report; and the decision to submit the report for publication, including whether they will have ultimate authority over any of these activities | 5c |                            |
| 9  | Composition, roles, and responsibilities of the coordinating centre, steering committee, endpoint adjudication committee, data management team, and other individuals or groups overseeing the trial, if applicable (see Item 21a for data monitoring committee)                         | 5d |                            |
| 10 | Description of research question and justification for undertaking the trial, including summary of relevant studies (published and unpublished) examining benefits and harms for each intervention                                                                                       | 6a | Background and rationale   |
| 11 | Explanation for choice of comparators                                                                                                                                                                                                                                                    | 6b |                            |
| 12 | Specific objectives or hypotheses                                                                                                                                                                                                                                                        | 7  | Objectives                 |
| 13 | Description of trial design including type of trial (eg, parallel group, crossover, factorial, single group), allocation ratio, and framework (eg, superiority, equivalence, noninferiority, exploratory)                                                                                | 8  | Trial design               |

**Introduction**

**Administrative information**

SPRIT 2013 Checklist: Recommended items to address in a clinical trial protocol and related documents\*

STANDARD PROTOCOL ITEMS: RECOMMENDATIONS FOR INTERVENTIONAL TRIALS









|    |     |                                                                              |                                                                               |
|----|-----|------------------------------------------------------------------------------|-------------------------------------------------------------------------------|
| 1  |     |                                                                              |                                                                               |
| 2  |     |                                                                              |                                                                               |
| 3  |     |                                                                              |                                                                               |
| 4  |     |                                                                              |                                                                               |
| 5  |     |                                                                              | level dataset, and statistical code                                           |
| 6  | 31c | Plans, if any, for granting public access to the full protocol, participant- |                                                                               |
| 7  |     |                                                                              | writers                                                                       |
| 8  |     |                                                                              |                                                                               |
| 9  | 31b | Authorship eligibility guidelines and any intended use of professional       |                                                                               |
| 10 |     |                                                                              |                                                                               |
| 11 |     |                                                                              | data sharing arrangements), including any publication restrictions            |
| 12 |     |                                                                              | groups (eg, via publication, reporting in results databases, or other         |
| 13 |     |                                                                              | participants, healthcare professionals, the public, and other relevant        |
| 14 | 31a | Plans for investigators and sponsor to communicate trial results to          | Dissemination policy                                                          |
| 15 |     |                                                                              |                                                                               |
| 16 |     |                                                                              | compensation to those who suffer harm from trial participation                |
| 17 | 30  | Provisions, if any, for ancillary and post-trial care, and for               | Ancillary and post-trial care                                                 |
| 18 |     |                                                                              |                                                                               |
| 19 |     |                                                                              | investigators                                                                 |
| 20 |     |                                                                              |                                                                               |
| 21 |     |                                                                              | disclosure of contractual agreements that limit such access for               |
| 22 | 29  | Statement of who will have access to the final trial dataset, and            | Access to data                                                                |
| 23 |     |                                                                              |                                                                               |
| 24 |     |                                                                              | the overall trial and each study site                                         |
| 25 | 28  | Financial and other competing interests for principal investigators for      | Declaration of interests                                                      |
| 26 |     |                                                                              |                                                                               |
| 27 |     |                                                                              | before, during, and after the trial                                           |
| 28 |     |                                                                              | be collected, shared, and maintained in order to protect confidentiality      |
| 29 | 27  | How personal information about potential and enrolled participants will      | Confidentiality                                                               |
| 30 |     |                                                                              |                                                                               |
| 31 |     |                                                                              | and biological specimens in ancillary studies, if applicable                  |
| 32 | 26b | Additional consent provisions for collection and use of participant data     |                                                                               |
| 33 |     |                                                                              |                                                                               |
| 34 |     |                                                                              | participants or authorised surrogates, and how (see item 32)                  |
| 35 | 26a | Who will obtain informed consent or assent from potential trial              | Consent or assent                                                             |
| 36 |     |                                                                              |                                                                               |
| 37 |     |                                                                              | regulators)                                                                   |
| 38 |     |                                                                              | (eg, investigators, REC/IRBs, trial participants, trial registries, journals, |
| 39 |     |                                                                              | changes to eligibility criteria, outcomes, analyses) to relevant parties      |
| 40 | 25  | Plans for communicating important protocol modifications (eg,                | Protocol amendments                                                           |
| 41 |     |                                                                              |                                                                               |
| 42 | 24  | Plans for seeking research ethics committee/institutional review board       | Research ethics approval                                                      |
| 43 |     |                                                                              | (REC/IRB) approval                                                            |
| 44 |     |                                                                              |                                                                               |
| 45 |     |                                                                              |                                                                               |
| 46 |     |                                                                              |                                                                               |
| 47 |     |                                                                              |                                                                               |
| 48 |     |                                                                              | <b>Ethics and dissemination</b>                                               |
| 49 |     |                                                                              |                                                                               |
| 50 |     |                                                                              | sponsor                                                                       |
| 51 |     |                                                                              | whether the process will be independent from investigators and the            |
| 52 | 23  | Frequency and procedures for auditing trial conduct, if any, and             | Auditing                                                                      |
| 53 |     |                                                                              |                                                                               |
| 54 |     |                                                                              | of trial interventions or trial conduct                                       |
| 55 |     |                                                                              | spontaneously reported adverse events and other unintended effects            |
| 56 | 22  | Plans for collecting, assessing, reporting, and managing solicited and       | Harms                                                                         |
| 57 |     |                                                                              |                                                                               |
| 58 |     |                                                                              | decision to terminate the trial                                               |
| 59 | 21b | Description of any interim analyses and stopping guidelines, including       |                                                                               |
| 60 |     |                                                                              | who will have access to these interim results and make the final              |

1  
2  
3  
4  
5  
6  
7  
8  
9  
10  
11  
12  
13  
14  
15  
16  
17  
18  
19  
20  
21  
22  
23  
24  
25  
26  
27  
28  
29  
30  
31  
32  
33  
34  
35  
36  
37  
38  
39  
40  
41  
42  
43  
44  
45  
46  
47  
48  
49  
50  
51  
52  
53  
54  
55  
56  
57  
58  
59  
60

**Appendices**

|                                                                                                                                                                                                |    |                      |
|------------------------------------------------------------------------------------------------------------------------------------------------------------------------------------------------|----|----------------------|
| Model consent form and other related documentation given to participants and authorised surrogates                                                                                             | 32 | Informed consent     |
| Plans for collection, laboratory evaluation, and storage of biological specimens for genetic or molecular analysis in the current trial and for future use in ancillary studies, if applicable | 33 | Biological specimens |

\*It is strongly recommended that this checklist be read in conjunction with the SPIRIT 2013 Explanation & Elaboration for important clarification on the items. Amendments to the protocol should be tracked and dated. The SPIRIT checklist is copyrighted by the SPIRIT Group under the Creative Commons "Attribution-NonCommercial-NoDerivs 3.0 Unported" license.

The above items have been advised when applicable. The copyright author.

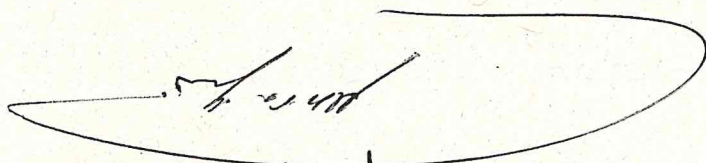

1  
2  
3  
4  
5  
6  
7  
8  
9  
10  
11  
12  
13  
14  
15  
16  
17  
18  
19  
20  
21  
22  
23  
24  
25  
26  
27  
28  
29  
30  
31  
32  
33  
34  
35  
36  
37  
38  
39  
40  
41  
42  
43  
44  
45  
46  
47  
48  
49  
50  
51  
52  
53  
54  
55  
56  
57  
58  
59  
60

# BMJ Open

## Randomized Phase II Trial of CAPTEM or FOLFIRI as Second-line Therapy in Neuroendocrine Carcinomas and Exploratory Analysis of Predictive Role of PET/CT Imaging and Biological Markers (SENECA Trial): A Study Protocol

|                                 |                                                                                                                                                                                                                                                                                                                                                                                                                                                                                                                                                                                                                                                                                                                                                                                                                                                                                                                                                                                                                                                                                                                                                                                                                                                                                                                                                                                                                                                                                                                                                                                                                                                                  |
|---------------------------------|------------------------------------------------------------------------------------------------------------------------------------------------------------------------------------------------------------------------------------------------------------------------------------------------------------------------------------------------------------------------------------------------------------------------------------------------------------------------------------------------------------------------------------------------------------------------------------------------------------------------------------------------------------------------------------------------------------------------------------------------------------------------------------------------------------------------------------------------------------------------------------------------------------------------------------------------------------------------------------------------------------------------------------------------------------------------------------------------------------------------------------------------------------------------------------------------------------------------------------------------------------------------------------------------------------------------------------------------------------------------------------------------------------------------------------------------------------------------------------------------------------------------------------------------------------------------------------------------------------------------------------------------------------------|
| Journal:                        | <i>BMJ Open</i>                                                                                                                                                                                                                                                                                                                                                                                                                                                                                                                                                                                                                                                                                                                                                                                                                                                                                                                                                                                                                                                                                                                                                                                                                                                                                                                                                                                                                                                                                                                                                                                                                                                  |
| Manuscript ID                   | bmjopen-2019-034393.R2                                                                                                                                                                                                                                                                                                                                                                                                                                                                                                                                                                                                                                                                                                                                                                                                                                                                                                                                                                                                                                                                                                                                                                                                                                                                                                                                                                                                                                                                                                                                                                                                                                           |
| Article Type:                   | Protocol                                                                                                                                                                                                                                                                                                                                                                                                                                                                                                                                                                                                                                                                                                                                                                                                                                                                                                                                                                                                                                                                                                                                                                                                                                                                                                                                                                                                                                                                                                                                                                                                                                                         |
| Date Submitted by the Author:   | 27-Mar-2020                                                                                                                                                                                                                                                                                                                                                                                                                                                                                                                                                                                                                                                                                                                                                                                                                                                                                                                                                                                                                                                                                                                                                                                                                                                                                                                                                                                                                                                                                                                                                                                                                                                      |
| Complete List of Authors:       | <p>Bongiovanni, Alberto; Istituto Scientifico Romagnolo per lo Studio e la Cura dei Tumori (IRST) IRCCS, Osteoncology and Rare Tumors Center Liverani, Chiara; Istituto Scientifico Romagnolo per lo Studio e la Cura dei Tumori (IRST) IRCCS, Osteoncology and Rare Tumors Center Pusceddu, Sara; Istituto Nazionale Tumori Milano IRCCS , Department of Medical Oncology</p> <p>Leo, Silvana; Vito Fazzi Hospital, Oncology Unit</p> <p>Di Meglio, Giovanni; Ospedale di Bolzano, Oncology Unit</p> <p>Tamberi, Stefano; Medical Oncology, Ospedale degli Infermi, Faenza</p> <p>Santini, Daniele; Università Campus Bio-Medico, Department of Medical Oncology</p> <p>Gelsomino, Fabio; Azienda Ospedaliero-Universitaria di Modena, Department of Oncology and Hematology</p> <p>Pucci, Francesca; Azienda Ospedaliero-Universitaria di Parma, Medical Oncology Unit</p> <p>Berardi, Rossana; AOU-Ospedali Riuniti Umberto I - G.M. Lancisi - G. Salesi, Oncology Clinic</p> <p>Lolli, Ivan; IRCCS 'Saverio Belli', Department of Oncology Bergamo, Francesca; Istituto Oncologico Veneto (IOV), Department of Clinical and Experimental Oncology</p> <p>Ricci, Sergio; Ospedale S. Chiara, Internal Medicine and Medical Oncology</p> <p>Foca, Flavia; Istituto Scientifico Romagnolo per lo Studio e la Cura dei Tumori (IRST) IRCCS, Unit of Biostatistics and Clinical Trials</p> <p>Severi, Stefano; Nuclear Medicine Unit Istituto Scientifico Romagnolo per lo Studio e la Cura dei Tumori (IRST) IRCCS</p> <p>Ibrahim, Toni; Istituto Scientifico Romagnolo per lo Studio e la Cura dei Tumori (IRST) IRCCS, Osteoncology and Rare Tumors Center</p> |
| <b>Primary Subject Heading</b>: | Oncology                                                                                                                                                                                                                                                                                                                                                                                                                                                                                                                                                                                                                                                                                                                                                                                                                                                                                                                                                                                                                                                                                                                                                                                                                                                                                                                                                                                                                                                                                                                                                                                                                                                         |
| Secondary Subject Heading:      | Oncology                                                                                                                                                                                                                                                                                                                                                                                                                                                                                                                                                                                                                                                                                                                                                                                                                                                                                                                                                                                                                                                                                                                                                                                                                                                                                                                                                                                                                                                                                                                                                                                                                                                         |
| Keywords:                       | CAPTEM, neuroendocrine carcinoma, FOLFIRI, capecitabine, temozolomide, second-line                                                                                                                                                                                                                                                                                                                                                                                                                                                                                                                                                                                                                                                                                                                                                                                                                                                                                                                                                                                                                                                                                                                                                                                                                                                                                                                                                                                                                                                                                                                                                                               |
|                                 |                                                                                                                                                                                                                                                                                                                                                                                                                                                                                                                                                                                                                                                                                                                                                                                                                                                                                                                                                                                                                                                                                                                                                                                                                                                                                                                                                                                                                                                                                                                                                                                                                                                                  |

1  
2  
3  
4  
5  
6  
7  
8  
9  
10  
11  
12  
13  
14  
15  
16  
17  
18  
19  
20  
21  
22  
23  
24  
25  
26  
27  
28  
29  
30  
31  
32  
33  
34  
35  
36  
37  
38  
39  
40  
41  
42  
43  
44  
45  
46  
47  
48  
49  
50  
51  
52  
53  
54  
55  
56  
57  
58  
59  
60

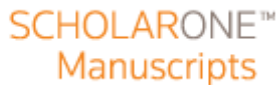



I, the Submitting Author has the right to grant and does grant on behalf of all authors of the Work (as defined in the below author licence), an exclusive licence and/or a non-exclusive licence for contributions from authors who are: i) UK Crown employees; ii) where BMJ has agreed a CC-BY licence shall apply, and/or iii) in accordance with the terms applicable for US Federal Government officers or employees acting as part of their official duties; on a worldwide, perpetual, irrevocable, royalty-free basis to BMJ Publishing Group Ltd ("BMJ") its licensees and where the relevant Journal is co-owned by BMJ to the co-owners of the Journal, to publish the Work in this journal and any other BMJ products and to exploit all rights, as set out in our [licence](#).

The Submitting Author accepts and understands that any supply made under these terms is made by BMJ to the Submitting Author unless you are acting as an employee on behalf of your employer or a postgraduate student of an affiliated institution which is paying any applicable article publishing charge ("APC") for Open Access articles. Where the Submitting Author wishes to make the Work available on an Open Access basis (and intends to pay the relevant APC), the terms of reuse of such Open Access shall be governed by a Creative Commons licence – details of these licences and which [Creative Commons](#) licence will apply to this Work are set out in our licence referred to above.

Other than as permitted in any relevant BMJ Author's Self Archiving Policies, I confirm this Work has not been accepted for publication elsewhere, is not being considered for publication elsewhere and does not duplicate material already published. I confirm all authors consent to publication of this Work and authorise the granting of this licence.

1  
2  
3  
4 1 **CLINICAL STUDY PROTOCOL**5  
6 27  
8  
9 3 **Randomized Phase II Trial of CAPTEM or FOLFIRI as**  
10  
11 4 **SEcond-line Therapy in NEuroendocrine CARcinomas and**  
12  
13 5 **Exploratory Analysis of Predictive Role of PET/CT Imaging**  
14  
15 6 **and Biological Markers (SENECA Trial): A Study Protocol**16  
17 7 **Running title: Second-line CAPTEM/FOLFIRI in NECs**18  
19 820  
21  
22 9 *Alberto Bongiovanni<sup>1\*</sup>, Chiara Liverani<sup>1</sup>, Sara Pusceddu<sup>2</sup>, Silvana Leo<sup>3</sup>, Giovanni Di*  
23  
24 10 *Meglio<sup>4</sup>, Stefano Tamberi<sup>5</sup>, Daniele Santini<sup>6</sup>, Fabio Gelsomino<sup>7</sup>, Francesca Pucci<sup>8</sup>,*  
25  
26 11 *Rossana Berardi<sup>9</sup>, Ivan Lolli<sup>10</sup>, Francesca Bergamo<sup>11</sup>, Sergio Ricci<sup>12</sup>, Flavia Foca<sup>13</sup>*  
27  
28 12 *Stefano Severi<sup>14</sup>, Toni Ibrahim<sup>1</sup>, and the SENECA Study Team Investigators\**29  
30  
31 13  
32  
33 14 *<sup>1</sup>Osteoncology and Rare Tumors Center, Istituto Scientifico Romagnolo per lo Studio e*  
34  
35 15 *la Cura dei Tumori (IRST) IRCCS, Meldola, Italy, <sup>2</sup>Department of Medical Oncology,*  
36  
37 16 *Istituto Nazionale Tumori Milano IRCCS, Milan, Italy, <sup>3</sup>Oncology Unit, Vito Fazzi*  
38  
39 17 *Hospital, Lecce, Italy, <sup>4</sup>Onocology Unit, Ospedale di Bolzano, Bolzano, Italy, <sup>5</sup>Medical*  
40  
41 18 *Oncology, Ospedale degli Infermi, Faenza, Italy, <sup>6</sup>Department of Medical Oncology,*  
42  
43 19 *Università Campus Bio-Medico, Rome, Italy, <sup>7</sup>Department of Oncology and*  
44  
45 20 *Hematology, Azienda Ospedaliera-Universitaria di Modena, Modena, Italy, <sup>8</sup>Medical*  
46  
47 21 *Oncology Unit, Azienda Ospedaliera-Universitaria di Parma, Parma, Italy, <sup>9</sup>Oncology*  
48  
49 22 *Clinic, AOU-Ospedali Riuniti Umberto I - G.M. Lancisi - G. Salesi, Ancona, Italy,*  
50  
51 23 *<sup>10</sup>Department of Oncology, IRCCS "Saverio De Bellis", Castellana Grotte, Italy,*  
52  
53 24 *<sup>11</sup>Department of Clinical and Experimental Oncology, Istituto Oncologico Veneto*  
54  
55 25 *(IOV), Padua, Italy, <sup>12</sup>Internal Medicine and Medical Oncology, Ospedale S. Chiara -*

1  
2  
3  
4 26 *AOU Pisana, Pisa, Italy, <sup>13</sup>Unit of Biostatistics and Clinical Trials, Istituto Scientifico*  
5  
6 27 *Romagnolo per lo Studio e la Cura dei Tumori (IRST) IRCCS, Meldola, Italy, <sup>14</sup>Nuclear*  
7  
8 28 *Medicine Unit, Istituto Scientifico Romagnolo per lo Studio e la Cura dei Tumori*  
9  
10 29 *(IRST) IRCCS, Meldola, Italy*  
11  
12  
13  
14  
15

16 31 **\*Correspondence:** Alberto Bongiovanni, MD  
17  
18 32 Osteoncology and Rare Tumors Center, Istituto Scientifico Romagnolo per lo Studio e  
19  
20 33 la Cura dei Tumori (IRST) IRCCS, Via Piero Maroncelli 40, 47014 Meldola (FC), Italy  
21  
22 34 Tel.: +39-0543-739100; Fax: +39-0543-739123  
23  
24 35 E-mail: [alberto.bongiovanni@irst.emr.it](mailto:alberto.bongiovanni@irst.emr.it)  
25  
26  
27  
28  
29

30 37 **Language style:** This article is formatted in British English.  
31  
32  
33  
34  
35  
36  
37  
38  
39  
40  
41  
42  
43  
44  
45  
46  
47  
48  
49  
50  
51  
52  
53  
54  
55  
56  
57  
58  
59  
60



1  
2  
3  
4  
5  
6  
7  
8  
9  
10  
11  
12  
13  
14  
15  
16  
17  
18  
19  
20  
21  
22  
23  
24  
25  
26  
27  
28  
29  
30  
31  
32  
33  
34  
35  
36  
37  
38  
39  
40  
41  
42  
43  
44  
45  
46  
47  
48  
49  
50  
51  
52  
53  
54  
55  
56  
57  
58  
59  
60  
61  
62  
63  
64  
65  
66  
67  
68  
69  
70  
71  
72

## 49 Abstract

50 **Introduction:** Patients with metastatic or locally advanced, non-resectable, grade 3  
51 poorly-differentiated gastroenteropancreatic (GEP) and lung neuroendocrine carcinomas  
52 (NECs) are usually treated with in first-line platinum compounds. There is no standard  
53 second-line treatment upon progression. Accurate biomarkers are needed to facilitate  
54 diagnosis and prognostic assessment of NEC patients.

55 **Methods and Analysis:** The SENECA (SEcond-line therapy in NEuroendocrine  
56 CArcinomas) study is a randomised, non-comparative, multicentre phase II trial  
57 designed to evaluate the efficacy and safety of folinic acid, 5-fluorouracil and irinotecan  
58 (FOLFIRI) or capecitabine plus temozolomide (CAPTEM) regimens after failure of  
59 first-line-chemotherapy in lung NEC and GEP-NEC patients. Secondary aims are to  
60 correlate the serum miRNA profile and primary mutational status of MEN1, DAXX,  
61 ATRX and RB-1 with prognosis and outcome and to investigate the prognostic and  
62 predictive role of the Ki-67 score and FDG- or <sup>68</sup>Ga-PET/CT. The main eligibility  
63 criteria are age  $\geq 18$  years; metastatic or locally advanced, non-resectable, grade 3 lung  
64 or GEP-NECs; progression to first-line platinum-based chemotherapy. A Bryant and  
65 Day design taking into account treatment activity and toxicity was used to estimate the  
66 sample size. All analyses will be performed separately for each treatment group in the  
67 intention-to-treat population. A total of 112 patients (56/arm) will be randomly assigned  
68 (1:1) to receive FOLFIRI every 14 days or CAPTEM every 28 days until disease  
69 progression or unacceptable toxicity or for a maximum of six months. Patients undergo  
70 testing for specific biomarkers in primary tumour tissue and for miRNA in blood  
71 samples. MiRNA profiling will be performed in the first 20 patients who agree to  
72 participate in the biological sub-study.

1  
2  
3  
4 73 **Ethics and dissemination:** The SENECA trial, supported by IRST, was authorised by  
5  
6 74 the local Ethics Committee and the Italian Medicines Agency (AIFA). Results will be  
7  
8 75 widely disseminated via peer-reviewed manuscripts, conference presentations and  
9  
10 76 reports to relevant authorities.  
11  
12  
13  
14 77

15 78 The study is currently open in Italy. Clinical trial registration: NCT03387592.  
16  
17  
18 79

19  
20 80 **Keywords:** neuroendocrine carcinoma, second-line, FOLFIRI, capecitabine,  
21  
22 81 temozolomide, CAPTEM  
23  
24

## 25 82 **Strengths and limitations of the study**

- 26  
27 83 • the SENECA trial randomises patients to receive two different treatments,  
28  
29 84 FOLFIRI or CAPTEM, providing important information on the activity of both  
30  
31 85 combinations in different NEC subtypes (NET grade (G) 3 and NEC G3).  
32  
33  
34 86 • The SENECA trial analyses the role of miRNAs and other biological markers as  
35  
36 87 prognostic and predictive factors. A further aim is to assess <sup>68</sup>Ga-PET/CT as a  
37  
38 88 tool to improve current histological classification.

39  
40  
41 89 The major limitations of the study are:

- 42  
43 90 • The rarity of the disease and patient prognosis. However, the involvement of  
44  
45 91 several Italian centres will hopefully help to overcome this problem.  
46  
47  
48 92 • Poor prognosis of NEC patients. Patients progressing on platinum chemotherapy  
49  
50 93 usually have rapid deterioration of clinical conditions  
51  
52  
53  
54  
55  
56  
57  
58  
59  
60

95

## 96 **Introduction**

97 Poorly differentiated neuroendocrine carcinomas (NECs) are very rare malignancies,  
98 representing only 5%-10% of neuroendocrine neoplasias (NENs) (1-3). At the time of  
99 diagnosis, patients are generally in poor conditions due to aggressive and diffuse  
100 disease. These tumors are characterised by aggressive histological features (high Ki-67  
101 index, extensive necrosis, and nuclear atypia) and are classified as grade (G) 3 NECs  
102 according to the 2010 World Health Organization (WHO) classification (4). The 2017  
103 WHO classification recognized a further group called G3 NETs as having intermediate  
104 features between NETs and NECs (5).

105 An etoposide-platinum combination is the gold standard for the treatment of G3  
106 NECs, several studies published in the 1990s reporting substantial anti-tumor activity  
107 and high response rates (41%-67%) (6). However, prognosis is generally poor with a  
108 median progression-free survival (PFS) of 9 months and a median overall survival (OS)  
109 of 15-19 months. When progression occurs after first-line chemotherapy, the disease is  
110 usually very aggressive and patients succumb rapidly (7).

111 Given the rarity of this disease, prospective clinical data are lacking and treatment  
112 recommendations are essentially expert-based opinions. Two phase II studies  
113 investigating the second-line treatment of GEP-NECs are currently registered at  
114 *ClinicalTrials.gov*, one evaluating the safety and tolerability of everolimus in  
115 40 patients with G3 NEC/NET or G1/G2 NET switching to G3 NEN (National Clinical  
116 Trial identifier NCT02113800) and the other investigating the efficacy of avelumab  
117 (NCT03147404). A French study focusing on the identification of predictive molecular  
118 markers of response to sunitinib in poorly differentiated digestive NETs

1  
2  
3  
4 119 (NCT01215578) has now closed recruitment and results are eagerly awaited. Another  
5  
6 120 French multicentre prospective phase II trial is currently ongoing to investigate the  
7  
8 121 efficacy of the bevacizumab-FOLFIRI combination after progression on a  
9  
10 122 platinum/etoposide combination (7).

13 123 Different second-line chemotherapy combinations have been evaluated but shown  
14  
15 124 poor results (8-10). In a monocentre retrospective clinical trial, Hentic et al.  
16  
17 125 hypothesised the potential efficacy of FOLFIRI as second-line chemotherapy in  
18  
19 126 19 patients with G3 extra-pulmonary NECs (11). An objective response rate was  
20  
21 127 obtained in 31% of patients, with a disease control rate (DCR) of 62%. Median PFS  
22  
23 128 and OS were 4 and 18 months, respectively.

24  
25  
26  
27 129 In another retrospective study, a 71% DCR was obtained with temozolomide-based  
28  
29 130 chemotherapy in 25 patients with metastatic poorly differentiated endocrine carcinoma  
30  
31 131 of different sites and atypical bronchial carcinoid with Ki-67 > 20%. Small cell lung  
32  
33 132 carcinoma and large cell lung carcinoma were excluded. A PFS of 12 months (95%  
34  
35 133 confidence interval [CI], 5.5- 24) and OS of 22 months (95% CI, 12-31) were reported  
36  
37 134 in patients who responded to treatment or showed stable disease (SD), whereas OS was  
38  
39 135 only 8 months (95% CI, 0-8) in non-responders. The authors observed a higher response  
40  
41 136 rate in patients with Ki-67 ≤ 60%. There were also more responders in the group with  
42  
43 137 high uptake in somatostatin receptor scintigraphy (SRS) and in those with positive  
44  
45 138 staining for chromogranin A. Both factors are often associated with more highly  
46  
47 139 differentiated tumours (12).

48  
49  
50 140 Literature data on lung NECs in progression after first-line chemotherapy are based  
51  
52 141 on small patient series (13). Moreover, there is increasing evidence of some  
53  
54 142 discrepancies in the current grading of NECs, highlighting the need for more accurate  
55  
56  
57  
58  
59  
60

1  
2  
3  
4 143 biomarkers (4, 5). Recent research has shown that NECs may, in fact, comprise two  
5  
6 144 distinct subgroups with different pathogenesis, *i.e.* a highly proliferative group derived  
7  
8  
9 145 from well differentiated neuroendocrine tumours (NETs) and characterised by  
10  
11 146 mutations in MEN1, DAXX and ATRX, and a poorly differentiated group derived from  
12  
13 147 neuroendocrine-differentiated adenocarcinomas and characterised by a mutation in  
14  
15  
16 148 RB1. Both subgroups display a distinct prognosis and different sensitivity to  
17  
18 149 chemotherapy (14-16). Micro(mi)RNAs are a class of small, non-coding, highly  
19  
20 150 conserved single-stranded RNAs involved in the post-transcriptional regulation of cell  
21  
22 151 proliferation, differentiation, survival, and apoptosis (17). They are often associated  
23  
24 152 with resistance to therapy (18, 19). Whilst miRNAs are known to show a specific  
25  
26  
27 153 expression pattern in NETs (20), little is known about differential miRNA profiles in  
28  
29 154 NEC patients. At present, no data are available on the deregulation of specific miRNAs  
30  
31  
32 155 in this setting.

33  
34 156 In a study recently published by our group on GEP-NEC patients undergoing  
35  
36 157 first-line platinum-based chemotherapy, median PFS was 19.3 months and 6.3 months  
37  
38 158 ( $p < 0.01$ ) in patients with Ki-67 value between 20% and 50% or  $>50\%$ , respectively  
39  
40 159 (19). Median (m)OS was 8.1 months in the latter group but was not reached in the  
41  
42 160 former group ( $p = 0.039$ ). Patients with a positive  $^{68}\text{Ga}$ -PET/CT had a higher 18-month  
43  
44 161 OS rate than those with a negative scan (75% vs. 34.3%, respectively), but the  
45  
46 162 difference was not statistically significant ( $p = 0.06$ ). Our data highlighted that  $^{68}\text{Ga}$ -  
47  
48 163 PET/CT positivity may be a discriminating factor (16, 21) in predicting prognosis,  
49  
50 164 especially in the metastatic setting where histological material is not always available  
51  
52 165 for evaluation. Furthermore,  $^{18}\text{F}$ fluorodeoxyglucose ( $^{18}\text{F}$ FDG)-PET/CT may be useful to  
53  
54  
55 166 discriminate between patients with different prognosis (22).  
56  
57  
58  
59  
60

1  
2  
3  
4 167 Given the above premises, we decided to investigate the efficacy and safety of  
5  
6 168 second-line FOLFIRI or CAPTEM in patients with GEP and lung NECs in progression  
7  
8  
9 169 after first-line platinum-based treatment. We also aimed to study the serum miRNA  
10  
11 170 profile in relation to the primary mutational status of MEN1, DAXX, ATRX and RB-1,  
12  
13  
14 171 patient prognosis and response to therapy, and to assess the prognostic and predictive  
15  
16 172 role of <sup>18</sup>FDG-PET/CT, <sup>68</sup>Ga-PET/CT and Ki-67 score.  
17

18 173

19  
20  
21 174

## 22 23 175 **Methods and Analysis**

### 24 25 26 176 Study design

27  
28  
29 177 The SENECA study is a multicentre randomised non-comparative phase II study  
30  
31 178 (Figure 1). Patients with metastatic neuroendocrine carcinomas of different origin  
32  
33  
34 179 (lung or gastroenteropancreatic) in progression after first-line treatment are randomized  
35  
36 180 to receive FOLFIRI every 14 days for a maximum of 12 cycles or until progression or  
37  
38 181 unacceptable toxicity, or CAPTEM every 28 days for a maximum of 6 cycles or until  
39  
40 182 progression or unacceptable toxicity.

41  
42  
43 183 The treatment arms are as follows:  
44

45 184

### 46 47 185 FOLFIRI regimen

- 48  
49  
50 186 • Irinotecan 180 mg/m<sup>2</sup>, given as a 60-min. intravenous (i.v.) infusion on day 1 every  
51  
52 187 2 weeks followed by
- 53  
54 188 • Leucovorin 200 mg/m<sup>2</sup>, given as a 2-h i.v. infusion on day 1 every 2 weeks followed  
55  
56  
57 189 by

- 1  
2  
3  
4 190 • 5-fluorouracil (5-FU) 400 mg/m<sup>2</sup> given as bolus, and then 5-FU 2400 mg/m<sup>2</sup> given  
5  
6 191 as a 48-h continuous infusion on day 1, every 2 weeks, until progression or for a  
7  
8 192 maximum of 12 cycles.

193

## 194 CAPTEM regimen

195 Capecitabine 750 mg/m<sup>2</sup> twice a day on days 1-14 in combination with temozolomide  
196 200 mg/m<sup>2</sup> daily on days 10-14, every 4 weeks, until progression or for a maximum of  
197 6 cycles.

198 The study includes patients aged  $\geq 18$  years with a histological diagnosis of G3  
199 neuroendocrine carcinoma (GEP-NEC and lung NEC) according to the 2010 and 2015  
200 GEP and Lung NEN WHO classifications, respectively, Ki-67  $>20\%$  and measurable  
201 disease according to Response Evaluation Criteria In Solid Tumors (RECIST) 1.1 criteria.  
202 All patients must have an Eastern Cooperative Oncology Group (ECOG) performance  
203 status  $\leq 2$  with a life expectancy  $> 3$  months and must have already undergone first-line  
204 treatment for metastatic disease with platinum -based chemotherapy  
205 (cisplatin/carboplatin and etoposide, FOLFOX4 or CAPOX). Adequate haematological,  
206 liver and renal function is required and effective contraceptive methods must be used by  
207 female patients of childbearing age. Written informed consent is obtained from all  
208 patients to take part in the study. Exclusion criteria are as follows: metastatic NECs  
209 previously treated with an irinotecan or temozolomide regimen, known hypersensitivity  
210 to 5-FU/capecitabine, calcium levofolinate, irinotecan or their recipients. All acute  
211 toxic effects of any prior therapy (including surgery, radiation therapy and  
212 chemotherapy) must have resolved to grade  $\leq 1$  according to National Cancer Institute  
213 Common Terminology Criteria for Adverse Events version 4.03 (CTCAE). Patients

1  
2  
3  
4 214 taking part in another clinical trial with any investigational agent < 30 days prior to  
5  
6 215 study screening or with a history of allergic reactions attributable to compounds of  
7  
8 216 similar chemical or biological composition are excluded. Patients who have undergone  
9  
10 217 chemotherapy or radiotherapy < 4 weeks (6 weeks for nitrosoureas or mitomycin C)  
11  
12 218 prior to entering the study, have not recovered from adverse events caused by agents  
13  
14 219 administered > 4 weeks earlier, or have known brain metastases are not eligible for the  
15  
16 220 study. Patients with other malignancies with a disease-free interval of < 5 years (with  
17  
18 221 the exception of non-melanoma skin cancer or low-grade superficial bladder cancer) are  
19  
20 222 excluded, as are those with any severe and/or uncontrolled medical condition or other  
21  
22 223 condition that could affect their participation in the study such as:

- 23 224 • unstable angina pectoris, symptomatic congestive heart failure, myocardial infarction  
24  
25 225 < 6 months before the start of the study, serious uncontrolled cardiac arrhythmia or  
26  
27 226 any other clinically significant cardiac disease;
- 28 227 • severely impaired lung function (spirometry and DLCO 50% of the normal predicted  
29  
30 228 value and/or oxygen saturation  $\leq$  88% at rest, in room air);
- 31 229 • uncontrolled diabetes as defined by fasting serum glucose  $>1.5$  x upper limit of  
32  
33 230 normal;
- 34 231 • any active (acute or chronic) or uncontrolled infections/disorders.

35  
36 232 Tumour evaluation by anatomic imaging (multiphase CT and/or MRI) includes chest,  
37  
38 233 abdomen, pelvis, and any additional known sites of disease. These tests are performed  
39  
40 234 at baseline, every three months during treatment as per national regulatory agency  
41  
42 235 indications, and after the end of treatment in non-progressing patients until progression.  
43  
44 236 It is recommended that  $^{68}\text{Ga}$ -PET/CT and  $^{18}\text{F}$ FDG-PET/CT scans be performed at  
45  
46 237 baseline or a maximum of 90 days before study enrollment. An EORTC quality of life  
47  
48  
49  
50  
51  
52  
53  
54  
55  
56  
57  
58  
59  
60



1  
2  
3  
4 238 questionnaire is administered at baseline and every three months thereafter during the  
5  
6 239 treatment period.  
7  
8

9 240

## 10 241 Study endpoints

11  
12  
13  
14 242 The primary endpoint of the study is the DCR of each treatment, defined as the  
15  
16 243 percentage of patients who have achieved complete or partial response or stable disease  
17  
18 244 for  $\geq 12$  weeks from the start of therapy. DCR will be evaluated using the new  
19  
20 245 international criteria proposed by the RECIST version 1.1. Acute and late toxicity will  
21  
22 246 be assessed by CTCAE Version 4.03, the latter defined as toxicity occurring at least  
23  
24 247 30 days after the end of the last treatment cycle. Secondary endpoints are OS, calculated  
25  
26 248 from the start of treatment to death from any cause, and PFS, calculated from the start of  
27  
28 249 treatment to the date of the first documented evidence of disease progression or of death  
29  
30 250 from any cause. All the analyses will be performed in the intention-to-treat population.  
31  
32 251 Patients without events at the time of analysis will be censored at their last-known-alive  
33  
34 252 date for OS and at their last date of tumour evaluation for PFS. A further secondary  
35  
36 253 endpoint is the evaluation of quality of life using the European Organization for the  
37  
38 254 Research and Treatment of Cancer Quality of Life Questionnaire (EORTC QLQ-C30).  
39  
40 255 When data are available, the impact of baseline  $^{68}\text{Ga}$ -PET/CT and  $^{18}\text{F}$ FDG-PET/CT on  
41  
42 256 PFS will be analysed with exploratory intent. After signing the informed consent for  
43  
44 257 biomarker assessment, patients will undergo evaluation of the mutation status of MEN1,  
45  
46 258 DAXX, ATRX and RB-1 in primary tumour tissue and of miRNA in blood samples.  
47  
48 259 Assessment of the miRNA profile will be performed on the first 20 patients who agree  
49  
50 260 to participate in the biological part of the study.  
51  
52  
53  
54  
55  
56  
57  
58  
59  
60

## 262 Ethical considerations

263 The present clinical trial (EudraCT 2016-000767-17), supported by IRST, was  
264 authorised by the local Ethics Committee and by the Italian Medicines Agency (AIFA).  
265 The study is also registered on the *ClinicalTrials.gov* website (NCT03387592). The  
266 study complies with the ethical standards laid down in the 1964 Declaration of Helsinki  
267 and the principles of Good Clinical Practice guidelines (including written informed  
268 consent).

## 269 Patient and public involvement

270 This research work was performed without patient involvement in the study design,  
271 execution or outcome measures.

## 273 Statistical methods

274 The Bryant and Day design is used to estimate a sample size that takes into account  
275 both treatment activity and toxicity. Although randomisation is used to allocate patients  
276 to the two arms, no formal statistical comparisons between treatment regimens are  
277 planned. The purpose of randomisation is to reduce bias due to patient assignment to a  
278 specific treatment arm. The hypothesis for the control arm is based on literature data  
279 (23, 24).

280 An  $\alpha$  level of 0.10 (both for toxicity and DCR) and a power of 90% have been  
281 adopted. A DCR rate  $\geq 60\%$  and a relevant toxicity rate  $\leq 20\%$  are considered acceptable  
282 rates, while a DCR rate  $\leq 40\%$  and a relevant toxicity rate  $\geq 40\%$  are considered  
283 unacceptable rates. Given these hypotheses, the first step of the study will require  
284 25 patients. If  $\geq 10$  patients with a DCR are observed and  $\geq 15$  patients do not have

1  
2  
3  
4 285 significant toxicity, the study will enrol patients in the next step. A total of 53 patients  
5  
6 286 will be enrolled. If  $\geq 25$  patients with DCR and  $\geq 36$  patients without any relevant  
7  
8 287 toxicity are observed, treatment will be considered active and not toxic. This design is  
9  
10 288 used for each treatment scheme and all analyses will be performed separately. If one of  
11  
12 289 the schemes does not obtain the expected proportions of the first step, the arm will be  
13  
14 290 closed and patients will be enrolled in the other arm until the target is reached; if the  
15  
16 291 expected proportions are not reached in any arm, the study will be prematurely closed.  
17  
18 292 If no premature stop occurs, a total of 106 evaluable patients are needed (53 patients in  
19  
20 293 each arm). Taking into account a 5% dropout rate, 56 patients must be enrolled in each  
21  
22 294 arm (total 112 patients). G3-4 gastrointestinal toxicity, G4 thrombocytopenia,  
23  
24 295 prolonged G3-G4 neutropenia ( $> 7$  days) and drug-related hospitalisations are  
25  
26 296 considered relevant toxicity. The stratification factors of this study are Ki-67 (21%-55  
27  
28 297 % vs.  $>55\%$ ) and site of primary tumour (lung vs. GEP). A subgroup analysis of the  
29  
30 298 efficacy of both treatments according to these stratification factors has been planned.  
31  
32  
33  
34  
35

36 299 Complete response, partial response or stable disease for at least 12 weeks will be  
37  
38 300 considered as the DCR. The proportion of patients in this category will be determined  
39  
40 301 and 95% CIs for the DCR will be calculated. OS and PFS will be estimated using the  
41  
42 302 Kaplan-Meier method (two-sided 95% CIs) (24). Appropriate statistical analyses will be  
43  
44 303 performed on the basis of the data available to compare QLQ-C30 scores between  
45  
46 304 baseline and subsequent follow-up visits.  
47  
48  
49

50 305 When data are available, the impact of  $^{68}\text{Ga}$ -PET/CT result on PFS will be analysed  
51  
52 306 with exploratory intent. The Shapiro-Wilk test will be used to determine the normality  
53  
54 307 distribution of each clinical, demographic and biological biomarker (25). In the event  
55  
56 308 of a non-normal distribution, nonparametric statistics will be used to analyse the  
57  
58  
59  
60

1  
2  
3  
4 309 relationship between the serum levels of each marker, considered as continuous  
5  
6 310 variables, and response to treatment. In the event of normal biomarker distribution,  
7  
8  
9 311 a parametric test will be used. All endpoints will be analysed separately for each  
10  
11 312 treatment group.

## 13 313 **Discussion**

16 314 There is still no truly effective second-line chemotherapy for neuroendocrine  
17  
18 315 carcinoma. Overall prognosis of patients is poor, with an OS of 5 months in the  
19  
20 316 metastatic setting according to SEER (Surveillance, Epidemiology, and End Results)  
21  
22 317 data (26). Only 5% of all patients are long-term survivors. There is also a marked lack  
23  
24 318 of prognostic and predictive factors (5).

27 319 Three phase II studies registered at *ClinicalTrials.gov* are currently investigating  
28  
29 320 second-line treatment of GEP-NECs, the first focusing on FOLFIRI and bevacizumab  
30  
31 321 (NCT02820857), the second on everolimus (NCT02113800) and the third on avelumab  
32  
33 322 (NCT03147404). Some abstracts were presented at ESMO (European Society for  
34  
35 323 Medical Oncology) 2018 and ASCO ( American Society of Clinical Oncology ) 2019  
36  
37 324 on the use of immunotherapy in GEP-NECs, all showing inconclusive results. The  
38  
39 325 SENECA study uses a promising approach to the treatment of patients with metastatic  
40  
41 326 NECs. First, both the activity and safety of 2 regimens are assessed in the same setting  
42  
43 327 with a sizeable patient population (56 patients/arm). In addition, patients are stratified  
44  
45 328 according to Ki-67 index and morphology to investigate the role of each treatment  
46  
47 329 combination in both poorly differentiated and well differentiated NECs. Another aim of  
48  
49 330 this study is to integrate both biological and metabolic imaging data in an effort to  
50  
51 331 improve the current GEP-NEC classification.  
52  
53  
54  
55  
56  
57  
58  
59  
60

1  
2  
3  
4 332 The duration of treatments in the metastatic setting is a dilemma in NENs and  
5  
6 333 especially in neuroendocrine carcinomas. Given the lack of evidence-based  
7  
8  
9 334 recommendations on treatment duration of second-line chemotherapy in NECs, we  
10  
11 335 decided to opt for a fixed duration of treatments to avoid unnecessary exposure to  
12  
13 336 cytotoxic agents and consequent bone marrow reserve depletion (27).

15 337 In conclusion, there are still no FDA/EMA (Food and Drug Administration/European  
16  
17  
18 338 Medicines Agency)-approved second-line therapeutic options for patients with  
19  
20 339 metastatic NECs, and the SENECA trial could represent a step forward in finding novel  
21  
22 340 therapies to prolong survival and maintain quality of life. Moreover, the integration of  
23  
24 341 biological and imaging data could -lead to a better understanding of the natural history  
25  
26 342 of the disease and help to identify potential responders.

27  
28  
29 343

30  
31  
32 344

### 34 345 **Confidentiality**

35  
36 346 This study will be conducted in full conformity with ICH (The International Council for  
37  
38 347 Harmonisation of Technical Requirements for Pharmaceuticals for Human Use)  
39  
40 348 Guidelines for Good Clinical Practice, Directive 2001/20/EEC of the European  
41  
42 349 Parliament and other relevant current local legislation. Participants will be allocated a  
43  
44 350 unique identification (ID) number at entry. The master list linking participant personal  
45  
46 351 information and ID number will be maintained in a separate locked cabinet and  
47  
48 352 password-protected hard-drive. Data will be analysed by ID number only. Patient files  
49  
50 353 and other source data will for be kept a maximum of 15 years.

51  
52  
53 354

54  
55  
56 355

1  
2  
3  
4 **356 Ethics and Dissemination**  
5

6 357 The SENECA trial, supported by IRST, involves several Italian centres and was  
7  
8 358 authorised by the local Ethics Committees of the centres taking part and by the Italian  
9  
10 359 Medicines Agency (AIFA). After completing the study, all data, including beneficial  
11  
12 360 and adverse events, of the trial will be communicated at scientific meetings and  
13  
14 361 published in indexed peer-reviewed journals. If shown to be effective, the therapy  
15  
16 362 program will be made available to the general public in an appropriate manner.  
17  
18  
19

20 363

21  
22 364

23  
24  
25 **365 Abbreviations**  
26

27 366 CAPTEM, capecitabine plus temozolomide; DCR, disease control rate; GEP,  
28  
29 367 gastroenteropancreatic; NEC, neuroendocrine carcinoma; NET, neuroendocrine tumour;  
30  
31 368 OS, overall survival; PFS, progression-free survival  
32  
33

34 369

35  
36 **370 Author contributions**  
37

38 371 AB, CL and TI designed the study and drafted the article. AB was responsible for data  
39  
40 372 acquisition. SP, SL, GDM, SS and ST provided methodological support and designed a  
41  
42 373 clinical information data extraction method for the protocol. FF performed the statistical  
43  
44 374 analysis. DS, FG, FP, RB, IL, FB and SR revised the paper for important intellectual  
45  
46 375 content. All authors read and approved the present version of the manuscript for  
47  
48 376 submission.  
49

50  
51 377

52  
53 378

54  
55 379  
56  
57  
58  
59  
60

1  
2  
3  
4 380 **Data availability statement**  
5

6 381 The datasets used and analysed in the present study are available from the  
7  
8  
9 382 corresponding author on reasonable request.  
10

11 383

12  
13 384 **Funding**  
14

15 385 The study was conducted in the absence of any commercial or financial relationships  
16  
17  
18 386 that could be construed as a potential conflict of interest.  
19

20 387

21  
22 388 **Conflicts of interest**  
23

24  
25 389 The authors declare no conflict of interest.  
26

27 390

28  
29 391 **Acknowledgements**  
30

31 392 *SENECA study Team investigators*: Davide Campana, Davide Pastorelli, Nicola  
32  
33  
34 393 Silvestris, Francesco Silvestris, Angela Buonadonna and Giuseppe Badalamenti.  
35  
36 394 The authors thank Gráinne Tierney and Cristiano Verna for editorial assistance.  
37  
38  
39  
40  
41  
42  
43  
44  
45  
46  
47  
48  
49  
50  
51  
52  
53  
54  
55  
56  
57  
58  
59  
60

1  
2  
3  
4  
5  
6  
7  
8  
9  
10  
11  
12  
13  
14  
15  
16  
17  
18  
19  
20  
21  
22  
23  
24  
25  
26  
27  
28  
29  
30  
31  
32  
33  
34  
35  
36  
37  
38  
39  
40  
41  
42  
43  
44  
45  
46  
47  
48  
49  
50  
51  
52  
53  
54  
55  
56  
57  
58  
59  
60

## 396 References

- 397 1. Kulke MH, Shah MH, Benson AB 3<sup>rd</sup>, Bergsland E, Berlin JD, Blaszkowsky LS, et  
398 al. Neuroendocrine tumors, version 1.2015. *J Natl Compr Canc Netw* (2015)  
399 13(1):78-108
- 400 2. Modlin IM, Moss SF, Chung DC, Jensen RT, Snyderwine E. Priorities for  
401 improving the management of gastroenteropancreatic neuroendocrine tumors. *J*  
402 *Natl Cancer Inst* (2008)100(18):1282-9. doi: 10.1093/jnci/djn275
- 403 3. Yao YC, Hassan M, Phan A, Dagohoy C, Leary C, Mares JE, et al. One hundred  
404 years after “carcinoid”: epidemiology of and prognostic factors for neuroendocrine  
405 tumors in 35,825 cases in the United States. *J Clin Oncol* (2008) 26(18):3063-72
- 406 4. Fraenkel M, Kim M, Faggiano A, de Herder WW, Valk GD; Knowledge NETwork.  
407 Incidence of gastroenteropancreatic neuroendocrine tumours: a systematic review  
408 of the literature. *Endocr Relat Cancer* (2014) 21(3):R153-63. doi: 10.1530/ERC-  
409 13-0125
- 410 5. Lloyd RV, Osamura RY, Klöppel G, Rosai J. WHO classification of tumours of  
411 endocrine organs. 4th ed (2017). Lyon: International Agency for Research on  
412 Cancer (IARC)
- 413 6. Sorbye H, Welin S, Langer SW, Vestermark LW, Holt N, Osterlund P, et al.  
414 Predictive and prognostic factors for treatment and survival in 305 patients with  
415 advanced gastrointestinal neuroendocrine carcinoma (WHO G3): the NORDIC  
416 NEC study. *Ann Oncol* (2013) 24(1):152-60.
- 417 7. Heetfeld M, Chougnet CN, Olsen IH, Rinke A, Borbath I, Crespo G, et al.  
418 Characteristics and treatment of patients with G3 gastroenteropancreatic  
419 neuroendocrine neoplasms. *Endocr Relat Cancer* (2015) 22(4):657-64. doi:



- 1  
2  
3  
4 420 10.1530/ERC-15-0119  
5  
6 421 8. Walter T, Malka D, Hentic O, Lombard-Bohas C, Le Malicot K, Smith D, et al.  
7  
8  
9 422 Evaluating bevacizumab in combination with FOLFIRI after the failure of  
10  
11 423 platinum-etoposide regimen in patients with advanced poorly  
12  
13 424 differentiated neuroendocrine carcinoma: The PRODIGE 41-BEVANEC  
14  
15 425 randomized phase II study. *Dig Liver Dis* (2018) 50(2):195-8. doi:  
16  
17 426 10.1016/j.dld.2017.11.020  
18  
19  
20 427 9. Hadoux J, Malka D, Planchard D, Scoazec JY, Caramella C, Guigay J, et al. Post-  
21  
22 428 first-line FOLFOX chemotherapy for grade 3 neuroendocrine carcinoma. *Endocr*  
23  
24 429 *Relat Cancer* (2015) 22(3):289-98. doi: 10.1530/ERC-15-0075  
25  
26  
27 430 10. Olsen IH, Sørensen JB, Federspiel B, Kjaer A, Hansen CP, Knigge U, et al.  
28  
29 431 Temozolomide as second or third line treatment of patients with neuroendocrine  
30  
31 432 carcinomas. *Sci World J* (2012) 2012:2012:170496. doi: 10.1100/2012/170496  
32  
33  
34 433 11. Hentic O, Hammel P, Couvelard A, Rebours V, Zappa M, Palazzo M, et al.  
35  
36 434 FOLFIRI regimen: an effective second-line chemotherapy after failure of  
37  
38 435 etoposide-platinum combination in patients with neuroendocrine carcinomas grade  
39  
40 436 3. *Endocr Relat Cancer* (2012) 9(6):751-7. doi: 10.1530/ERC-12-0002  
41  
42  
43 437 12. Welin S, Sorbye H, Sebjornsen S, Knappskog S, Busch C, Oberg K. Clinical effect  
44  
45 438 of temozolomide-based chemotherapy in poorly differentiated endocrine carcinoma  
46  
47 439 after progression on first-line chemotherapy. *Cancer* (2011) 117(20):4617-22. doi:  
48  
49 440 10.1002/cncr.26124  
50  
51  
52 441 13. Noda K, Nishiwaki Y, Kawahara M, Negoro S, Sugiura T, Yokoyama A, et al.  
53  
54 442 Irinotecan plus cisplatin compared with etoposide plus cisplatin for extensive small-  
55  
56 443 cell lung cancer. *N Engl J Med* (2002) 346(2):85-91. doi: 10.1056/NEJMoa003034  
57  
58  
59  
60

- 1  
2  
3  
4 444 14. Derks JL, Leblay N, Thunnissen E, van Suylen RJ, den Bakker M, Groen HJM, et  
5  
6 445 al. Molecular subtypes of pulmonary large-cell neuroendocrine carcinoma predict  
7  
8 446 chemotherapy treatment outcome. *Clin Cancer Res* (2018) 24(1):33-42. doi:  
9  
10 447 10.1158/1078-0432.CCR-17-1921  
11  
12  
13 448 15. Tang LH, Untch BR, Reidy DL, O'Reilly E, Dhall D, Jih L, et al. Well-  
14  
15 449 differentiated neuroendocrine tumors with a morphologically apparent high-grade  
16  
17 450 component: a pathway distinct from poorly differentiated neuroendocrine  
18  
19 451 carcinomas. *Clin Cancer Res* (2016) 22(4):1011-7. doi: 10.1158/1078-0432.CCR-  
20  
21 452 15-0548  
22  
23  
24 453 16. Liverani C, Bongiovanni A, Mercatali L, Foca F, Pieri F, De Vita A, Spadazzi C,  
25  
26 454 Miserocchi G, Recine F, Riva N, Nicolini S, Severi S, Martinelli G, Ibrahim T.  
27  
28 455 Grading of Neuroendocrine Carcinomas: Correlation of 68Ga-PET/CT Scan with  
29  
30 456 Tissue Biomarkers. *Dis Markers*. 2018 Dec 2;2018:6878409.  
31  
32  
33 457 17. Grolmusz VK, Kövesdi A, Borcs K, Igaz P, Patócs A. Prognostic relevance of  
34  
35 458 proliferation-related miRNAs in pancreatic neuroendocrine neoplasms *Eur J*  
36  
37 459 *Endocrinol* (2018) 179(4):219-28. doi: 10.1530/EJE-18-0305  
38  
39  
40 460 18. Gill P, Kim E, Chua TC, Clifton-Bligh RJ, Nahm CB, Mittal A, et al. MiRNA-3653  
41  
42 461 is a potential tissue biomarker for increased metastatic risk in pancreatic  
43  
44 462 neuroendocrine tumours. *Endocr Pathol* (2019). doi: 10.1007/s12022-019-9570-y  
45  
46 463 [Epub ahead of print]  
47  
48  
49 464 19. Panarelli N, Tyryshkin K, Wong JJM, Majewski A, Yang X, Scognamiglio T, et al.  
50  
51 465 Evaluating gastroenteropancreatic neuroendocrine tumors through microRNA  
52  
53 466 sequencing. *Endocr Relat Cancer* (2019) 26(1):47-57. doi: 10.1530/ERC-18-0244  
54  
55  
56 467 20. Malczewska A, Kidd M, Matar S, Kos-Kudla B, Modlin IM. A comprehensive  
57  
58  
59  
60

- 1  
2  
3  
4 468 assessment of the role of mirnas as biomarkers in gastroenteropancreatic  
5  
6 469 neuroendocrine tumors. *Neuroendocrinology* (2018)107(1):73-90. doi:  
7  
8  
9 470 10.1159/000487326  
10  
11 471 21. Bongiovanni A, Riva N, Ricci M, Liverani C, La Manna F, De Vita A, et al. First-  
12  
13 472 line chemotherapy in patients with metastatic gastroenteropancreatic  
14  
15 473 neuroendocrinecarcinoma. *Onco Targets Ther* (2015) 8:3613-9. doi:  
16  
17 474 10.2147/OTT.S91971  
18  
19  
20 475 22. Sansovini M, Severi S, Ianniello A, Nicolini S, Fantini L, Mezzenga E, Ferroni F,  
21  
22 476 Scarpi E, Monti M, Bongiovanni A, Cingarlini S, Grana CM, Bodei L, Paganelli G.  
23  
24 477 Long-term follow-up and role of  
25  
26 478 FDG PET in advanced pancreatic neuroendocrine patients treated with 177Lu-D  
27  
28 479 OTATATE. *Eur J Nucl Med Mol Imaging*. 2017 Mar;44(3):490-499.  
29  
30  
31 480 23. Sorbye H, Welin S, Langer SW, Vestermarck LW, Holt N, Osterlund P, et al.  
32  
33 481 Predictive and prognostic factors for treatment and survival in 305 patients with  
34  
35 482 advanced Gastrointestinal neuroendocrine carcinoma (WHO G3):  
36  
37 483 the NORDIC NEC study. *Ann Oncol* (2013) 24(1):152-60. doi:  
38  
39 484 10.1093/annonc/mds276  
40  
41  
42 485 24. Perren A, Couvelard A, Scoazec JY, Costa F, Borbath I, Delle Fave G, et al.  
43  
44 486 ENETS consensus guidelines for the standards of care in neuroendocrine tumors:  
45  
46 487 pathology: diagnosis and prognostic stratification. *Neuroendocrinology* (2017)  
47  
48 488 105(3):196-200. doi: 10.1159/000457956  
49  
50  
51 489 25. Sorbye H, Köhne CH, Sargent DJ, Glimelius B. Patient characteristics and  
52  
53 490 stratification in medical treatment studies for metastatic colorectal cancer: a  
54  
55 491 proposal for standardization of patient characteristic reporting and stratification.  
56  
57  
58  
59  
60

1  
2  
3  
4 492 *Ann Oncol* (2007) 18(10):1666-72.

5  
6 493 26. Kaplan EL, Meier P. Nonparametric estimation from incomplete observations.  
7  
8  
9 494 *J. Amer. Statist Assoc* (1958) 53:457-81.

10  
11 495 27. Strosberg JR, Fine RL, Choi J, Nasir A, Coppola D, Chen DT, et al. First-line  
12  
13 496 chemotherapy with capecitabine and temozolomide in patients with metastatic  
14  
15 497 pancreatic endocrine carcinomas. *Cancer* (2011) 117 (2):268-75.

16  
17  
18 498

19  
20 499

21  
22 500

23  
24  
25 501 **Figure legend**

26  
27 502 **FIGURE 1** | SENECA study design.

28  
29 503  
30  
31  
32  
33  
34  
35  
36  
37  
38  
39  
40  
41  
42  
43  
44  
45  
46  
47  
48  
49  
50  
51  
52  
53  
54  
55  
56  
57  
58  
59  
60

1  
2  
3  
4  
5  
6  
7  
8  
9  
10  
11  
12  
13  
14  
15  
16  
17  
18  
19  
20  
21  
22  
23  
24  
25  
26  
27  
28  
29  
30  
31  
32  
33  
34  
35  
36  
37  
38  
39  
40  
41  
42  
43  
44  
45  
46  
47  
48  
49  
50  
51  
52  
53  
54  
55  
56  
57  
58  
59  
60

Fig. 1



FIGURE 1 | SENECA study design.

90x91mm (300 x 300 DPI)



# CONSORT 2010 checklist of information to include when reporting a randomised trial\*

| Section/Topic      | Item No | Checklist item                                                                                                                                                                              | Reported on page No |
|--------------------|---------|---------------------------------------------------------------------------------------------------------------------------------------------------------------------------------------------|---------------------|
| Title and abstract | 1a      | Identification as a randomised trial in the title                                                                                                                                           | 1                   |
|                    | 1b      | Structured summary of trial design, methods, results, and conclusions (for specific guidance see CONSORT for abstracts)                                                                     | 3                   |
| Introduction       | 2a      | Scientific background and explanation of rationale                                                                                                                                          | 5-7                 |
|                    | 2b      | Specific objectives or hypotheses                                                                                                                                                           | 7                   |
| Methods            | 3a      | Description of trial design (such as parallel, factorial) including allocation ratio                                                                                                        | 8-11                |
|                    | 3b      | Important changes to methods after trial commencement (such as eligibility criteria), with reasons                                                                                          | not applicable      |
| Participants       | 4a      | Eligibility criteria for participants                                                                                                                                                       | 9                   |
|                    | 4b      | Settings and locations where the data were collected                                                                                                                                        | 14-15               |
| Interventions      | 5       | The interventions for each group with sufficient details to allow replication, including how and when they were actually administered                                                       | 8, 9                |
|                    | 6a      | Completely defined pre-specified primary and secondary outcome measures, including how and when they were assessed                                                                          | 10, 11              |
| Outcomes           | 6b      | Any changes to trial outcomes after the trial commenced, with reasons                                                                                                                       | N/A                 |
|                    | 7a      | How sample size was determined                                                                                                                                                              | 12                  |
| Sample size        | 7b      | When applicable, explanation of any interim analyses and stopping guidelines                                                                                                                | N/A                 |
|                    | 8a      | Method used to generate the random allocation sequence                                                                                                                                      | 12                  |
| Randomisation:     | 8b      | Type of randomisation; details of any restriction (such as blocking and block size)                                                                                                         | 12                  |
|                    | 9       | Mechanism used to implement the random allocation sequence (such as sequentially numbered containers), describing any steps taken to conceal the sequence until interventions were assigned | 12                  |
| Implementation     | 10      | Who generated the random allocation sequence, who enrolled participants, and who assigned participants to interventions                                                                     | 12                  |
|                    | 11a     | If done, who was blinded after assignment to interventions (for example, participants, care providers, those                                                                                | N/A                 |

1  
2  
3  
4  
5  
6  
7  
8  
9  
10  
11  
12  
13  
14  
15  
16  
17  
18  
19  
20  
21  
22  
23  
24  
25  
26  
27  
28  
29  
30  
31  
32  
33  
34  
35  
36  
37  
38  
39  
40  
41  
42  
43  
44  
45  
46  
47  
48  
49  
50  
51  
52  
53  
54  
55  
56  
57  
58  
59  
60

assessing outcomes) and how

11b If relevant, description of the similarity of interventions N/A

12a Statistical methods used to compare groups for primary and secondary outcomes N/A

12b Methods for additional analyses, such as subgroup analyses and adjusted analyses 12, 13

**Results**

Participant flow (a diagram is strongly recommended) 13a For each group, the numbers of participants who were randomly assigned, received intended treatment, and were analysed for the primary outcome 8, 12

13b For each group, losses and exclusions after randomisation, together with reasons N/A

14a Dates defining the periods of recruitment and follow-up 12

14b Why the trial ended or was stopped N/A

Baseline data 15 A table showing baseline demographic and clinical characteristics for each group N/A

Numbers analysed 16 For each group, number of participants (denominator) included in each analysis and whether the analysis was by original assigned groups N/A

Outcomes and estimation 17a For each primary and secondary outcome, results for each group, and the estimated effect size and its precision (such as 95% confidence interval) 12

17b For binary outcomes, presentation of both absolute and relative effect sizes is recommended 12

Ancillary analyses 18 Results of any other analyses performed, including subgroup analyses and adjusted analyses, distinguishing pre-specified from exploratory 12

Harms 19 All important harms or unintended effects in each group (for specific guidance see CONSORT for harms)

**Discussion**

Limitations 20 Trial limitations, addressing sources of potential bias, imprecision, and, if relevant, multiplicity of analyses 4

Generalisability 21 Generalisability (external validity, applicability) of the trial findings 13, 14

Interpretation 22 Interpretation consistent with results, balancing benefits and harms, and considering other relevant evidence 13, 14

**Other information**

Registration 23 Registration number and name of trial registry 13

Protocol 24 Where the full trial protocol can be accessed, if available 14, 15

Funding 25 Sources of funding and other support (such as supply of drugs), role of funders 16

\*We strongly recommend reading this statement in conjunction with the CONSORT 2010 Explanation and Elaboration for important clarifications on all the items. If relevant, we also recommend reading CONSORT extensions for cluster randomised trials, non-inferiority and equivalence trials, non-pharmacological treatments, herbal interventions, and pragmatic trials. Additional extensions are forthcoming: for those and for up to date references relevant to this checklist, see [www.consort-statement.org](http://www.consort-statement.org).

1  
2  
3  
4  
5  
6  
7  
8  
9  
10  
11  
12  
13  
14  
15  
16  
17  
18  
19  
20  
21  
22  
23  
24  
25  
26  
27  
28  
29  
30  
31  
32  
33  
34  
35  
36  
37  
38  
39  
40  
41  
42  
43  
44  
45  
46  
47  
48  
49  
50  
51  
52  
53  
54  
55  
56  
57  
58  
59  
60

1  
2  
3  
4  
5  
6  
7  
8  
9  
10  
11  
12  
13  
14  
15  
16  
17  
18  
19  
20  
21  
22  
23  
24  
25  
26  
27  
28  
29  
30  
31  
32  
33  
34  
35  
36  
37  
38  
39  
40  
41  
42  
43  
44  
45  
46  
47  
48  
49  
50  
51  
52  
53  
54  
55  
56  
57  
58  
59  
60

|    |                                                                                                                                                                                                                                                                                          |    |                            |
|----|------------------------------------------------------------------------------------------------------------------------------------------------------------------------------------------------------------------------------------------------------------------------------------------|----|----------------------------|
| 1  | Descriptive title identifying the study design, population, interventions, and, if applicable, trial acronym                                                                                                                                                                             | 1  | Title                      |
| 2  | Trial identifier and registry name. If not yet registered, name of intended registry                                                                                                                                                                                                     | 2a | Trial registration         |
| 3  | All items from the World Health Organization Trial Registration Data Set                                                                                                                                                                                                                 | 2b |                            |
| 4  | Date and version identifier                                                                                                                                                                                                                                                              | 3  | Protocol version           |
| 5  | Sources and types of financial, material, and other support                                                                                                                                                                                                                              | 4  | Funding                    |
| 6  | Names, affiliations, and roles of protocol contributors                                                                                                                                                                                                                                  | 5a | Roles and responsibilities |
| 7  | Name and contact information for the trial sponsor                                                                                                                                                                                                                                       | 5b |                            |
| 8  | Role of study sponsor and funders, if any, in study design, collection, management, analysis, and interpretation of data; writing of the report; and the decision to submit the report for publication, including whether they will have ultimate authority over any of these activities | 5c |                            |
| 9  | Composition, roles, and responsibilities of the coordinating centre, steering committee, endpoint adjudication committee, data management team, and other individuals or groups overseeing the trial, if applicable (see Item 21a for data monitoring committee)                         | 5d |                            |
| 10 | Description of research question and justification for undertaking the trial, including summary of relevant studies (published and unpublished) examining benefits and harms for each intervention                                                                                       | 6a | Background and rationale   |
| 11 | Explanation for choice of comparators                                                                                                                                                                                                                                                    | 6b |                            |
| 12 | Specific objectives or hypotheses                                                                                                                                                                                                                                                        | 7  | Objectives                 |
| 13 | Description of trial design including type of trial (eg, parallel group, crossover, factorial, single group), allocation ratio, and framework (eg, superiority, equivalence, noninferiority, exploratory)                                                                                | 8  | Trial design               |

**Introduction**

**Administrative information**

SPRIT 2013 Checklist: Recommended items to address in a clinical trial protocol and related documents\*

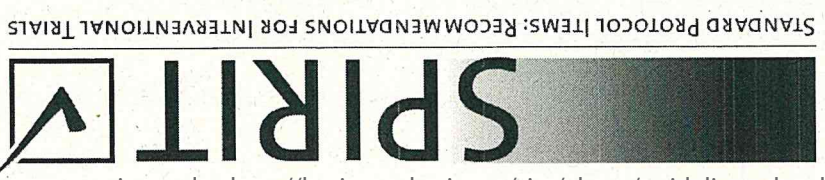



1  
2  
3  
4  
5  
6  
7  
8  
9  
10  
11  
12  
13  
14  
15  
16  
17  
18  
19  
20  
21  
22  
23  
24  
25  
26  
27  
28  
29  
30  
31  
32  
33  
34  
35  
36  
37  
38  
39  
40  
41  
42  
43  
44  
45  
46  
47  
48  
49  
50  
51  
52  
53  
54  
55  
56  
57  
58  
59  
60

|                                                                     |                      |                                                                                                                                                                                                                                                                                                                                                                                   |
|---------------------------------------------------------------------|----------------------|-----------------------------------------------------------------------------------------------------------------------------------------------------------------------------------------------------------------------------------------------------------------------------------------------------------------------------------------------------------------------------------|
| <b>Methods: Participants, interventions, and outcomes</b>           |                      |                                                                                                                                                                                                                                                                                                                                                                                   |
| 9                                                                   | Study setting        | Description of study settings (eg, community clinic, academic hospital) and list of countries where data will be collected. Reference to where list of study sites can be obtained                                                                                                                                                                                                |
| 10                                                                  | Eligibility criteria | 10 Inclusion and exclusion criteria for participants. If applicable, eligibility criteria for study centres and individuals who will perform the interventions (eg, surgeons, psychotherapists)                                                                                                                                                                                   |
| 11a                                                                 | Interventions        | 11a Interventions for each group with sufficient detail to allow replication, including how and when they will be administered                                                                                                                                                                                                                                                    |
| 11b                                                                 |                      | 11b Criteria for discontinuing or modifying allocated interventions for a given trial participant (eg, drug dose change in response to harms, participant request, or improving/worsening disease)                                                                                                                                                                                |
| 11c                                                                 |                      | 11c Strategies to improve adherence to intervention protocols, and any procedures for monitoring adherence (eg, drug tablet return, laboratory tests)                                                                                                                                                                                                                             |
| 11d                                                                 |                      | 11d Relevant concomitant care and interventions that are permitted or prohibited during the trial                                                                                                                                                                                                                                                                                 |
| 12                                                                  | Outcomes             | 12 Primary, secondary, and other outcomes, including the specific measurement variable (eg, systolic blood pressure), analysis metric (eg, change from baseline, final value, time to event), method of aggregation (eg, median, proportion), and time point for each outcome. Explanation of the clinical relevance of chosen efficacy and harm outcomes is strongly recommended |
| 13                                                                  | Participant timeline | 13 Time schedule of enrolment, interventions (including any run-ins and washouts), assessments, and visits for participants. A schematic diagram is highly recommended (see Figure)                                                                                                                                                                                               |
| 14                                                                  | Sample size          | 14 Estimated number of participants needed to achieve study objectives and how it was determined, including clinical and statistical assumptions supporting any sample size calculations                                                                                                                                                                                          |
| 15                                                                  | Recruitment          | 15 Strategies for achieving adequate participant enrolment to reach target sample size                                                                                                                                                                                                                                                                                            |
| <b>Methods: Assignment of interventions (for controlled trials)</b> |                      |                                                                                                                                                                                                                                                                                                                                                                                   |
| Allocation:                                                         |                      |                                                                                                                                                                                                                                                                                                                                                                                   |
| 16a                                                                 | Sequence generation  | 16a Method of generating the allocation sequence (eg, computer-generated random numbers), and list of any factors for stratification. To reduce predictability of a random sequence, details of any planned restriction (eg, blocking) should be provided in a separate document that is unavailable to those who enrol participants or assign interventions                      |



|    |     |                                                                              |                                                                               |
|----|-----|------------------------------------------------------------------------------|-------------------------------------------------------------------------------|
| 1  |     |                                                                              |                                                                               |
| 2  |     |                                                                              |                                                                               |
| 3  |     |                                                                              |                                                                               |
| 4  |     |                                                                              |                                                                               |
| 5  |     |                                                                              | level dataset, and statistical code                                           |
| 6  | 31c | Plans, if any, for granting public access to the full protocol, participant- |                                                                               |
| 7  |     |                                                                              | writers                                                                       |
| 8  |     |                                                                              |                                                                               |
| 9  | 31b | Authorship eligibility guidelines and any intended use of professional       |                                                                               |
| 10 |     |                                                                              |                                                                               |
| 11 |     |                                                                              | data sharing arrangements), including any publication restrictions            |
| 12 |     |                                                                              | groups (eg, via publication, reporting in results databases, or other         |
| 13 |     |                                                                              | participants, healthcare professionals, the public, and other relevant        |
| 14 | 31a | Plans for investigators and sponsor to communicate trial results to          | Dissemination policy                                                          |
| 15 |     |                                                                              |                                                                               |
| 16 |     |                                                                              | compensation to those who suffer harm from trial participation                |
| 17 | 30  | Provisions, if any, for ancillary and post-trial care, and for               | Ancillary and post-trial care                                                 |
| 18 |     |                                                                              |                                                                               |
| 19 |     |                                                                              | investigators                                                                 |
| 20 |     |                                                                              | disclosure of contractual agreements that limit such access for               |
| 21 |     |                                                                              | Statement of who will have access to the final trial dataset, and             |
| 22 | 29  |                                                                              | Access to data                                                                |
| 23 |     |                                                                              | the overall trial and each study site                                         |
| 24 |     |                                                                              | Financial and other competing interests for principal investigators for       |
| 25 | 28  |                                                                              | Declaration of interests                                                      |
| 26 |     |                                                                              | before, during, and after the trial                                           |
| 27 |     |                                                                              | be collected, shared, and maintained in order to protect confidentiality      |
| 28 |     |                                                                              | How personal information about potential and enrolled participants will       |
| 29 | 27  |                                                                              | Confidentiality                                                               |
| 30 |     |                                                                              | and biological specimens in ancillary studies, if applicable                  |
| 31 |     |                                                                              | Additional consent provisions for collection and use of participant data      |
| 32 | 26b |                                                                              |                                                                               |
| 33 |     |                                                                              | participants or authorised surrogates, and how (see item 32)                  |
| 34 |     |                                                                              | Who will obtain informed consent or assent from potential trial               |
| 35 | 26a |                                                                              | Consent or assent                                                             |
| 36 |     |                                                                              | regulators)                                                                   |
| 37 |     |                                                                              | (eg, investigators, REC/IRBs, trial participants, trial registries, journals, |
| 38 |     |                                                                              | changes to eligibility criteria, outcomes, analyses) to relevant parties      |
| 39 |     |                                                                              | Plans for communicating important protocol modifications (eg,                 |
| 40 | 25  |                                                                              | Protocol amendments                                                           |
| 41 |     |                                                                              | (REC/IRB) approval                                                            |
| 42 |     |                                                                              | Plans for seeking research ethics committee/institutional review board        |
| 43 | 24  |                                                                              | Research ethics approval                                                      |
| 44 |     |                                                                              |                                                                               |
| 45 |     |                                                                              |                                                                               |
| 46 |     |                                                                              |                                                                               |
| 47 |     |                                                                              |                                                                               |
| 48 |     |                                                                              | <b>Ethics and dissemination</b>                                               |
| 49 |     |                                                                              |                                                                               |
| 50 |     |                                                                              | sponsor                                                                       |
| 51 |     |                                                                              | whether the process will be independent from investigators and the            |
| 52 | 23  |                                                                              | Auditing                                                                      |
| 53 |     |                                                                              | Frequency and procedures for auditing trial conduct, if any, and              |
| 54 |     |                                                                              | of trial interventions or trial conduct                                       |
| 55 |     |                                                                              | spontaneously reported adverse events and other unintended effects            |
| 56 |     |                                                                              | Plans for collecting, assessing, reporting, and managing solicited and        |
| 57 | 22  |                                                                              | Harms                                                                         |
| 58 |     |                                                                              | decision to terminate the trial                                               |
| 59 |     |                                                                              | who will have access to these interim results and make the final              |
| 60 | 21b | Description of any interim analyses and stopping guidelines, including       |                                                                               |

1  
2  
3  
4  
5  
6  
7  
8  
9  
10  
11  
12  
13  
14  
15  
16  
17  
18  
19  
20  
21  
22  
23  
24  
25  
26  
27  
28  
29  
30  
31  
32  
33  
34  
35  
36  
37  
38  
39  
40  
41  
42  
43  
44  
45  
46  
47  
48  
49  
50  
51  
52  
53  
54  
55  
56  
57  
58  
59  
60

**Appendices**

|                                                                                                                                                                                                |    |                      |
|------------------------------------------------------------------------------------------------------------------------------------------------------------------------------------------------|----|----------------------|
| Model consent form and other related documentation given to participants and authorised surrogates                                                                                             | 32 | Informed consent     |
| Plans for collection, laboratory evaluation, and storage of biological specimens for genetic or molecular analysis in the current trial and for future use in ancillary studies, if applicable | 33 | Biological specimens |

\*It is strongly recommended that this checklist be read in conjunction with the SPIRIT 2013 Explanation & Elaboration for important clarification on the items. Amendments to the protocol should be tracked and dated. The SPIRIT checklist is copyrighted by the SPIRIT Group under the Creative Commons "Attribution-NonCommercial-NoDerivs 3.0 Unported" license.

The above items have been advised when applicable.  
The responsible author.

1  
2  
3  
4  
5  
6  
7  
8  
9  
10  
11  
12  
13  
14  
15  
16  
17  
18  
19  
20  
21  
22  
23  
24  
25  
26  
27  
28  
29  
30  
31  
32  
33  
34  
35  
36  
37  
38  
39  
40  
41  
42  
43  
44  
45  
46  
47  
48  
49  
50  
51  
52  
53  
54  
55  
56  
57  
58  
59  
60

# BMJ Open

## Randomized Phase II Trial of CAPTEM or FOLFIRI as Second-line Therapy in Neuroendocrine Carcinomas and Exploratory Analysis of Predictive Role of PET/CT Imaging and Biological Markers (SENECA Trial): A Study Protocol

|                                 |                                                                                                                                                                                                                                                                                                                                                                                                                                                                                                                                                                                                                                                                                                                                                                                                                                                                                                                                                                                                                                                                                                                                                                                                                                                                                                                                                                                                                                                                                                                                                                                                                                                                                                                          |
|---------------------------------|--------------------------------------------------------------------------------------------------------------------------------------------------------------------------------------------------------------------------------------------------------------------------------------------------------------------------------------------------------------------------------------------------------------------------------------------------------------------------------------------------------------------------------------------------------------------------------------------------------------------------------------------------------------------------------------------------------------------------------------------------------------------------------------------------------------------------------------------------------------------------------------------------------------------------------------------------------------------------------------------------------------------------------------------------------------------------------------------------------------------------------------------------------------------------------------------------------------------------------------------------------------------------------------------------------------------------------------------------------------------------------------------------------------------------------------------------------------------------------------------------------------------------------------------------------------------------------------------------------------------------------------------------------------------------------------------------------------------------|
| Journal:                        | <i>BMJ Open</i>                                                                                                                                                                                                                                                                                                                                                                                                                                                                                                                                                                                                                                                                                                                                                                                                                                                                                                                                                                                                                                                                                                                                                                                                                                                                                                                                                                                                                                                                                                                                                                                                                                                                                                          |
| Manuscript ID                   | bmjopen-2019-034393.R3                                                                                                                                                                                                                                                                                                                                                                                                                                                                                                                                                                                                                                                                                                                                                                                                                                                                                                                                                                                                                                                                                                                                                                                                                                                                                                                                                                                                                                                                                                                                                                                                                                                                                                   |
| Article Type:                   | Protocol                                                                                                                                                                                                                                                                                                                                                                                                                                                                                                                                                                                                                                                                                                                                                                                                                                                                                                                                                                                                                                                                                                                                                                                                                                                                                                                                                                                                                                                                                                                                                                                                                                                                                                                 |
| Date Submitted by the Author:   | 08-May-2020                                                                                                                                                                                                                                                                                                                                                                                                                                                                                                                                                                                                                                                                                                                                                                                                                                                                                                                                                                                                                                                                                                                                                                                                                                                                                                                                                                                                                                                                                                                                                                                                                                                                                                              |
| Complete List of Authors:       | Bongiovanni, Alberto; Istituto Scientifico Romagnolo per lo Studio e la Cura dei Tumori (IRST) IRCCS, Osteoncology and Rare Tumors Center Liverani, Chiara; Istituto Scientifico Romagnolo per lo Studio e la Cura dei Tumori (IRST) IRCCS, Osteoncology and Rare Tumors Center Pusceddu, Sara; Istituto Nazionale per lo Studio e la Cura dei Tumori, Department of Medical Oncology<br>Leo, Silvana; Ospedale Vito Fazzi, Oncology Unit<br>Di Meglio, Giovanni; Ospedale di Bolzano, Oncology Unit<br>Tamberi, Stefano; Ospedale degli Infermi di Faenza<br>Santini, Daniele; Campus Bio-Medico University, Department of Medical Oncology<br>Gelsomino, Fabio; Azienda Ospedaliero-Universitaria di Modena, Department of Oncology and Hematology<br>Pucci, Francesca; Azienda Ospedaliero-Universitaria di Parma, Medical Oncology Unit<br>Berardi, Rossana; University Hospital of Ancona Umberto I G M Lancisi G Salesi, Oncology Clinic<br>Lolli, Ivan; Istituto Nazionale di Ricovero e Cura a Carattere Scientifico Saverio de Bellis, Department of Oncology<br>Bergamo, Francesca; Istituto Oncologico Veneto Istituto di Ricovero e Cura a Carattere Scientifico, Department of Clinical and Experimental Oncology<br>Ricci, Sergio; Santa Chiara Hospital, Internal Medicine and Medical Oncology<br>Foca, Flavia; Istituto Scientifico Romagnolo per lo Studio e la Cura dei Tumori (IRST) IRCCS, Unit of Biostatistics and Clinical Trials<br>Severi, Stefano; Nuclear Medicine Unit Istituto Scientifico Romagnolo per lo Studio e la Cura dei Tumori (IRST) IRCCS<br>Ibrahim, Toni; Istituto Scientifico Romagnolo per lo Studio e la Cura dei Tumori (IRST) IRCCS, Osteoncology and Rare Tumors Center |
| <b>Primary Subject Heading</b>: | Oncology                                                                                                                                                                                                                                                                                                                                                                                                                                                                                                                                                                                                                                                                                                                                                                                                                                                                                                                                                                                                                                                                                                                                                                                                                                                                                                                                                                                                                                                                                                                                                                                                                                                                                                                 |
| Secondary Subject Heading:      | Oncology                                                                                                                                                                                                                                                                                                                                                                                                                                                                                                                                                                                                                                                                                                                                                                                                                                                                                                                                                                                                                                                                                                                                                                                                                                                                                                                                                                                                                                                                                                                                                                                                                                                                                                                 |
| Keywords:                       | CAPTEM, neuroendocrine carcinoma, FOLFIRI, capecitabine, temozolomide, second-line                                                                                                                                                                                                                                                                                                                                                                                                                                                                                                                                                                                                                                                                                                                                                                                                                                                                                                                                                                                                                                                                                                                                                                                                                                                                                                                                                                                                                                                                                                                                                                                                                                       |

1  
2  
3  
4  
5  
6  
7  
8  
9  
10  
11  
12  
13  
14  
15  
16  
17  
18  
19  
20  
21  
22  
23  
24  
25  
26  
27  
28  
29  
30  
31  
32  
33  
34  
35  
36  
37  
38  
39  
40  
41  
42  
43  
44  
45  
46  
47  
48  
49  
50  
51  
52  
53  
54  
55  
56  
57  
58  
59  
60

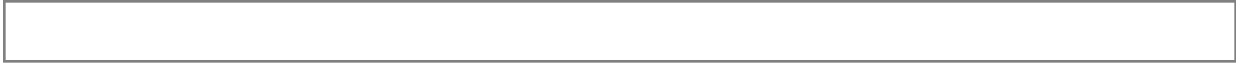

SCHOLARONE™  
Manuscripts

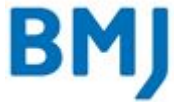

I, the Submitting Author has the right to grant and does grant on behalf of all authors of the Work (as defined in the below author licence), an exclusive licence and/or a non-exclusive licence for contributions from authors who are: i) UK Crown employees; ii) where BMJ has agreed a CC-BY licence shall apply, and/or iii) in accordance with the terms applicable for US Federal Government officers or employees acting as part of their official duties; on a worldwide, perpetual, irrevocable, royalty-free basis to BMJ Publishing Group Ltd ("BMJ") its licensees and where the relevant Journal is co-owned by BMJ to the co-owners of the Journal, to publish the Work in this journal and any other BMJ products and to exploit all rights, as set out in our [licence](#).

The Submitting Author accepts and understands that any supply made under these terms is made by BMJ to the Submitting Author unless you are acting as an employee on behalf of your employer or a postgraduate student of an affiliated institution which is paying any applicable article publishing charge ("APC") for Open Access articles. Where the Submitting Author wishes to make the Work available on an Open Access basis (and intends to pay the relevant APC), the terms of reuse of such Open Access shall be governed by a Creative Commons licence – details of these licences and which [Creative Commons](#) licence will apply to this Work are set out in our licence referred to above.

Other than as permitted in any relevant BMJ Author's Self Archiving Policies, I confirm this Work has not been accepted for publication elsewhere, is not being considered for publication elsewhere and does not duplicate material already published. I confirm all authors consent to publication of this Work and authorise the granting of this licence.



1  
2  
3  
4 1 **CLINICAL STUDY PROTOCOL**5  
6 27  
8  
9 3 **Randomized Phase II Trial of CAPTEM or FOLFIRI as**  
10  
11 4 **SEcond-line Therapy in NEuroendocrine CARcinomas and**  
12  
13 5 **Exploratory Analysis of Predictive Role of PET/CT Imaging**  
14  
15 6 **and Biological Markers (SENECA Trial): A Study Protocol**16  
17 7 **Running title: Second-line CAPTEM/FOLFIRI in NECs**18  
19 820  
21  
22 9 *Alberto Bongiovanni<sup>1\*</sup>, Chiara Liverani<sup>1</sup>, Sara Pusceddu<sup>2</sup>, Silvana Leo<sup>3</sup>, Giovanni Di*  
23  
24 10 *Meglio<sup>4</sup>, Stefano Tamberi<sup>5</sup>, Daniele Santini<sup>6</sup>, Fabio Gelsomino<sup>7</sup>, Francesca Pucci<sup>8</sup>,*  
25  
26 11 *Rossana Berardi<sup>9</sup>, Ivan Lolli<sup>10</sup>, Francesca Bergamo<sup>11</sup>, Sergio Ricci<sup>12</sup>, Flavia Foca<sup>13</sup>*  
27  
28 12 *Stefano Severi<sup>14</sup>, Toni Ibrahim<sup>1</sup>, and the SENECA Study Team Investigators\**29  
30  
31 13  
32  
33 14 *<sup>1</sup>Osteoncology and Rare Tumors Center, Istituto Scientifico Romagnolo per lo Studio e*  
34  
35 15 *la Cura dei Tumori (IRST) IRCCS, Meldola, Italy, <sup>2</sup>Department of Medical Oncology,*  
36  
37 16 *Istituto Nazionale Tumori Milano IRCCS, Milan, Italy, <sup>3</sup>Oncology Unit, Vito Fazzi*  
38  
39 17 *Hospital, Lecce, Italy, <sup>4</sup>Onocology Unit, Ospedale di Bolzano, Bolzano, Italy, <sup>5</sup>Medical*  
40  
41 18 *Oncology, Ospedale degli Infermi, Faenza, Italy, <sup>6</sup>Department of Medical Oncology,*  
42  
43 19 *Università Campus Bio-Medico, Rome, Italy, <sup>7</sup>Department of Oncology and*  
44  
45 20 *Hematology, Azienda Ospedaliera-Universitaria di Modena, Modena, Italy, <sup>8</sup>Medical*  
46  
47 21 *Oncology Unit, Azienda Ospedaliera-Universitaria di Parma, Parma, Italy, <sup>9</sup>Oncology*  
48  
49 22 *Clinic, AOU-Ospedali Riuniti Umberto I - G.M. Lancisi - G. Salesi, Ancona, Italy,*  
50  
51 23 *<sup>10</sup>Department of Oncology, IRCCS "Saverio De Bellis", Castellana Grotte, Italy,*  
52  
53 24 *<sup>11</sup>Department of Clinical and Experimental Oncology, Istituto Oncologico Veneto*  
54  
55 25 *(IOV), Padua, Italy, <sup>12</sup>Internal Medicine and Medical Oncology, Ospedale S. Chiara -*

1  
2  
3  
4 26 *AOU Pisana, Pisa, Italy, <sup>13</sup>Unit of Biostatistics and Clinical Trials, Istituto Scientifico*  
5  
6 27 *Romagnolo per lo Studio e la Cura dei Tumori (IRST) IRCCS, Meldola, Italy, <sup>14</sup>Nuclear*  
7  
8 28 *Medicine Unit, Istituto Scientifico Romagnolo per lo Studio e la Cura dei Tumori*  
9  
10 29 *(IRST) IRCCS, Meldola, Italy*  
11  
12  
13  
14  
15

16 31 **\*Correspondence:** Alberto Bongiovanni, MD  
17  
18 32 Osteoncology and Rare Tumors Center, Istituto Scientifico Romagnolo per lo Studio e  
19  
20 33 la Cura dei Tumori (IRST) IRCCS, Via Piero Maroncelli 40, 47014 Meldola (FC), Italy  
21  
22 34 Tel.: +39-0543-739100; Fax: +39-0543-739123  
23  
24 35 E-mail: [alberto.bongiovanni@irst.emr.it](mailto:alberto.bongiovanni@irst.emr.it)  
25  
26  
27  
28  
29

30 37 **Language style:** This article is formatted in British English.  
31  
32  
33  
34  
35  
36  
37  
38  
39  
40  
41  
42  
43  
44  
45  
46  
47  
48  
49  
50  
51  
52  
53  
54  
55  
56  
57  
58  
59  
60



1  
2  
3  
4 73 **Ethics and dissemination:** The SENECA trial, supported by IRST, was authorised by  
5  
6 74 the local Ethics Committee and the Italian Medicines Agency (AIFA). Results will be  
7  
8  
9 75 widely disseminated via peer-reviewed manuscripts, conference presentations and  
10  
11 76 reports to relevant authorities.  
12

13  
14 77  
15 78 The study is currently open in Italy. ClinicalTrials.gov Identifier: NCT03387592.

16 79 EudraCT number: 2016-000767-17

17  
18 80 Protocol version: Clinical Study Protocol Version 1, 07.11.2016.  
19

20  
21 81

22  
23 82 **Keywords:** neuroendocrine carcinoma, second-line, FOLFIRI, capecitabine,  
24

25  
26 83 temozolomide, CAPTEM  
27

#### 28 29 84 **Strengths and limitations of the study**

- 30  
31 85
- 32 • the SENECA trial randomises patients to receive two different treatments,  
33 FOLFIRI or CAPTEM, providing important information on the activity of both  
34 86 combinations in different NEC subtypes (NET grade (G) 3 and NEC G3).  
35  
36 87
  - 37 • The SENECA trial analyses the role of miRNAs and other biological markers as  
38 88 prognostic and predictive factors. A further aim is to assess <sup>68</sup>Ga-PET/CT as a  
39  
40 89 tool to improve current histological classification.  
41  
42 90

43  
44 91 The major limitations of the study are:

- 45  
46 92 • The rarity of the disease and patient prognosis. However, the involvement of  
47  
48 93 several Italian centres will hopefully help to overcome this problem.
- 49  
50 94 • Poor prognosis of NEC patients. Patients progressing on platinum chemotherapy  
51  
52 95 usually have rapid deterioration of clinical conditions  
53  
54  
55  
56  
57  
58  
59  
60

97

**98 Introduction**

99 Poorly differentiated neuroendocrine carcinomas (NECs) are very rare malignancies,  
100 representing only 5%-10% of neuroendocrine neoplasias (NENs) (1-3). At the time of  
101 diagnosis, patients are generally in poor conditions due to aggressive and diffuse  
102 disease. These tumors are characterised by aggressive histological features (high Ki-67  
103 index, extensive necrosis, and nuclear atypia) and are classified as grade (G) 3 NECs  
104 according to the 2010 World Health Organization (WHO) classification (4). The 2017  
105 WHO classification recognized a further group called G3 NETs as having intermediate  
106 features between NETs and NECs (5).

107 An etoposide-platinum combination is the gold standard for the treatment of G3  
108 NECs, several studies published in the 1990s reporting substantial anti-tumor activity  
109 and high response rates (41%-67%) (6). However, prognosis is generally poor with a  
110 median progression-free survival (PFS) of 9 months and a median overall survival (OS)  
111 of 15-19 months. When progression occurs after first-line chemotherapy, the disease is  
112 usually very aggressive and patients succumb rapidly (7).

113 Given the rarity of this disease, prospective clinical data are lacking and treatment  
114 recommendations are essentially expert-based opinions. Two phase II studies  
115 investigating the second-line treatment of GEP-NECs are currently registered at  
116 *ClinicalTrials.gov*, one evaluating the safety and tolerability of everolimus in  
117 40 patients with G3 NEC/NET or G1/G2 NET switching to G3 NEN (National Clinical  
118 Trial identifier NCT02113800) and the other investigating the efficacy of avelumab  
119 (NCT03147404). A French study focusing on the identification of predictive molecular  
120 markers of response to sunitinib in poorly differentiated digestive NETs

1  
2  
3  
4 121 (NCT01215578) has now closed recruitment and results are eagerly awaited. Another  
5  
6 122 French multicentre prospective phase II trial is currently ongoing to investigate the  
7  
8 123 efficacy of the bevacizumab-FOLFIRI combination after progression on a  
9  
10 124 platinum/etoposide combination (7).

13 125 Different second-line chemotherapy combinations have been evaluated but shown  
14  
15 126 poor results (8-10). In a monocentre retrospective clinical trial, Hentic et al.  
16  
17 127 hypothesised the potential efficacy of FOLFIRI as second-line chemotherapy in  
18  
19 128 19 patients with G3 extra-pulmonary NECs (11). An objective response rate was  
20  
21 129 obtained in 31% of patients, with a disease control rate (DCR) of 62%. Median PFS  
22  
23 130 and OS were 4 and 18 months, respectively.

24  
25  
26  
27 131 In another retrospective study, a 71% DCR was obtained with temozolomide-based  
28  
29 132 chemotherapy in 25 patients with metastatic poorly differentiated endocrine carcinoma  
30  
31 133 of different sites and atypical bronchial carcinoid with Ki-67 > 20%. Small cell lung  
32  
33 134 carcinoma and large cell lung carcinoma were excluded. A PFS of 12 months (95%  
34  
35 135 confidence interval [CI], 5.5- 24) and OS of 22 months (95% CI, 12-31) were reported  
36  
37 136 in patients who responded to treatment or showed stable disease (SD), whereas OS was  
38  
39 137 only 8 months (95% CI, 0-8) in non-responders. The authors observed a higher response  
40  
41 138 rate in patients with Ki-67 ≤ 60%. There were also more responders in the group with  
42  
43 139 high uptake in somatostatin receptor scintigraphy (SRS) and in those with positive  
44  
45 140 staining for chromogranin A. Both factors are often associated with more highly  
46  
47 141 differentiated tumours (12).

48  
49  
50 142 Literature data on lung NECs in progression after first-line chemotherapy are based  
51  
52 143 on small patient series (13). Moreover, there is increasing evidence of some  
53  
54 144 discrepancies in the current grading of NECs, highlighting the need for more accurate  
55  
56  
57  
58  
59  
60

1  
2  
3  
4 145 biomarkers (4, 5). Recent research has shown that NECs may, in fact, comprise two  
5  
6 146 distinct subgroups with different pathogenesis, *i.e.* a highly proliferative group derived  
7  
8 147 from well differentiated neuroendocrine tumours (NETs) and characterised by  
9  
10 148 mutations in MEN1, DAXX and ATRX, and a poorly differentiated group derived from  
11  
12 149 neuroendocrine-differentiated adenocarcinomas and characterised by a mutation in  
13  
14 150 RB1. Both subgroups display a distinct prognosis and different sensitivity to  
15  
16 151 chemotherapy (14-16). Micro(mi)RNAs are a class of small, non-coding, highly  
17  
18 152 conserved single-stranded RNAs involved in the post-transcriptional regulation of cell  
19  
20 153 proliferation, differentiation, survival, and apoptosis (17). They are often associated  
21  
22 154 with resistance to therapy (18, 19). Whilst miRNAs are known to show a specific  
23  
24 155 expression pattern in NETs (20), little is known about differential miRNA profiles in  
25  
26 156 NEC patients. At present, no data are available on the deregulation of specific miRNAs  
27  
28 157 in this setting.

29  
30  
31  
32  
33  
34 158 In a study recently published by our group on GEP-NEC patients undergoing  
35  
36 159 first-line platinum-based chemotherapy, median PFS was 19.3 months and 6.3 months  
37  
38 160 ( $p < 0.01$ ) in patients with Ki-67 value between 20% and 50% or  $>50\%$ , respectively  
39  
40 161 (19). Median (m)OS was 8.1 months in the latter group but was not reached in the  
41  
42 162 former group ( $p = 0.039$ ). Patients with a positive  $^{68}\text{Ga}$ -PET/CT had a higher 18-month  
43  
44 163 OS rate than those with a negative scan (75% vs. 34.3%, respectively), but the  
45  
46 164 difference was not statistically significant ( $p = 0.06$ ). Our data highlighted that  $^{68}\text{Ga}$ -  
47  
48 165 PET/CT positivity may be a discriminating factor (16, 21) in predicting prognosis,  
49  
50 166 especially in the metastatic setting where histological material is not always available  
51  
52 167 for evaluation. Furthermore,  $^{18}\text{F}$ fluorodeoxyglucose ( $^{18}\text{F}$ FDG)-PET/CT may be useful to  
53  
54 168 discriminate between patients with different prognosis (22).  
55  
56  
57  
58  
59  
60

1  
2  
3  
4 169 Given the above premises, we decided to investigate the efficacy and safety of  
5  
6 170 second-line FOLFIRI or CAPTEM in patients with GEP and lung NECs in progression  
7  
8  
9 171 after first-line platinum-based treatment. We also aimed to study the serum miRNA  
10  
11 172 profile in relation to the primary mutational status of MEN1, DAXX, ATRX and RB-1,  
12  
13 173 patient prognosis and response to therapy, and to assess the prognostic and predictive  
14  
15 174 role of <sup>18</sup>F-FDG-PET/CT, <sup>68</sup>Ga-PET/CT and Ki-67 score.  
16  
17  
18 175  
19  
20  
21 176

## 22 23 177 **Methods and Analysis**

### 24 25 26 178 Study design

27  
28  
29 179 The SENECA study is a multicentre randomised non-comparative phase II study  
30  
31 180 (Figure 1). Patients with metastatic neuroendocrine carcinomas of different origin  
32  
33 181 (lung or gastroenteropancreatic) in progression after first-line treatment are randomized  
34  
35 182 to receive FOLFIRI every 14 days for a maximum of 12 cycles or until progression or  
36  
37 183 unacceptable toxicity, or CAPTEM every 28 days for a maximum of 6 cycles or until  
38  
39 184 progression or unacceptable toxicity.  
40  
41

42 185 The treatment arms are as follows:  
43  
44  
45 186

### 46 47 187 FOLFIRI regimen

- 48  
49 188 • Irinotecan 180 mg/m<sup>2</sup>, given as a 60-min. intravenous (i.v.) infusion on day 1 every  
50  
51 189 2 weeks followed by
- 52  
53 190 • Leucovorin 200 mg/m<sup>2</sup>, given as a 2-h i.v. infusion on day 1 every 2 weeks followed  
54  
55 191 by



- 1  
2  
3  
4 192 • 5-fluorouracil (5-FU) 400 mg/m<sup>2</sup> given as bolus, and then 5-FU 2400 mg/m<sup>2</sup> given  
5  
6 193 as a 48-h continuous infusion on day 1, every 2 weeks, until progression or for a  
7  
8 194 maximum of 12 cycles.

9  
10  
11 195

### 12 13 196 CAPTEM regimen

14  
15  
16 197 Capecitabine 750 mg/m<sup>2</sup> twice a day on days 1-14 in combination with temozolomide  
17  
18 198 200 mg/m<sup>2</sup> daily on days 10-14, every 4 weeks, until progression or for a maximum of  
19  
20  
21 199 6 cycles.

22  
23 200 The study includes patients aged  $\geq 18$  years with a histological diagnosis of G3  
24  
25 201 neuroendocrine carcinoma (GEP-NEC and lung NEC) according to the 2010 and 2015  
26  
27 202 GEP and Lung NEN WHO classifications, respectively, Ki-67  $>20\%$  and measurable  
28  
29 203 disease according to Response Evaluation Criteria In Solid Tumors (RECIST) 1.1 criteria.  
30  
31 204 All patients must have an Eastern Cooperative Oncology Group (ECOG) performance  
32  
33 205 status  $\leq 2$  with a life expectancy  $> 3$  months and must have already undergone first-line  
34  
35 206 treatment for metastatic disease with platinum -based chemotherapy  
36  
37 207 (cisplatin/carboplatin and etoposide, FOLFOX4 or CAPOX). Adequate haematological,  
38  
39 208 liver and renal function is required and effective contraceptive methods must be used by  
40  
41 209 female patients of childbearing age. Written informed consent is obtained from all  
42  
43 210 patients to take part in the study. Exclusion criteria are as follows: metastatic NECs  
44  
45 211 previously treated with an irinotecan or temozolomide regimen, known hypersensitivity  
46  
47 212 to 5-FU/capecitabine, calcium levofolinate, irinotecan or their recipients. All acute  
48  
49 213 toxic effects of any prior therapy (including surgery, radiation therapy and  
50  
51 214 chemotherapy) must have resolved to grade  $\leq 1$  according to National Cancer Institute  
52  
53 215 Common Terminology Criteria for Adverse Events version 4.03 (CTCAE). Patients  
54  
55  
56  
57  
58  
59  
60

1  
2  
3  
4 216 taking part in another clinical trial with any investigational agent < 30 days prior to  
5  
6 217 study screening or with a history of allergic reactions attributable to compounds of  
7  
8 218 similar chemical or biological composition are excluded. Patients who have undergone  
9  
10 219 chemotherapy or radiotherapy < 4 weeks (6 weeks for nitrosoureas or mitomycin C)  
11  
12 220 prior to entering the study, have not recovered from adverse events caused by agents  
13  
14 221 administered > 4 weeks earlier, or have known brain metastases are not eligible for the  
15  
16 222 study. Patients with other malignancies with a disease-free interval of < 5 years (with  
17  
18 223 the exception of non melanoma skin cancer or low-grade superficial bladder cancer) are  
19  
20 224 excluded, as are those with any severe and/or uncontrolled medical condition or other  
21  
22 225 condition that could affect their participation in the study such as:

- 23 226 • unstable angina pectoris, symptomatic congestive heart failure, myocardial infarction  
24 227 < 6 months before the start of the study, serious uncontrolled cardiac arrhythmia or  
25 228 any other clinically significant cardiac disease;
- 26 229 • severely impaired lung function (spirometry and DLCO 50% of the normal predicted  
27 230 value and/or oxygen saturation  $\leq$  88% at rest, in room air);
- 28 231 • uncontrolled diabetes as defined by fasting serum glucose  $>1.5$  x upper limit of  
29 232 normal;
- 30 233 • any active (acute or chronic) or uncontrolled infections/disorders.

31 234 Tumour evaluation by anatomic imaging (multiphase CT and/or MRI) includes chest,  
32 235 abdomen, pelvis, and any additional known sites of disease. These tests are performed  
33 236 at baseline, every three months during treatment as per national regulatory agency  
34 237 indications, and after the end of treatment in non-progressing patients until progression.  
35 238 It is recommended that  $^{68}\text{Ga}$ -PET/CT and  $^{18}\text{F}$ FDG-PET/CT scans be performed at  
36 239 baseline or a maximum of 90 days before study enrollment. An EORTC quality of life  
37  
38  
39  
40  
41  
42  
43  
44  
45  
46  
47  
48  
49  
50  
51  
52  
53  
54  
55  
56  
57  
58  
59  
60

1  
2  
3  
4 240 questionnaire is administered at baseline and every three months thereafter during the  
5  
6 241 treatment period.

7  
8  
9 242

### 10 243 Study endpoints

11  
12  
13  
14 244 The primary endpoint of the study is the DCR of each treatment, defined as the  
15  
16 245 percentage of patients who have achieved complete or partial response or stable disease  
17  
18 246 for  $\geq 12$  weeks from the start of therapy. DCR will be evaluated using the new  
19  
20 247 international criteria proposed by the RECIST version 1.1. Acute and late toxicity will  
21  
22 248 be assessed by CTCAE Version 4.03, the latter defined as toxicity occurring at least  
23  
24 249 30 days after the end of the last treatment cycle. Secondary endpoints are OS, calculated  
25  
26 250 from the start of treatment to death from any cause, and PFS, calculated from the start of  
27  
28 251 treatment to the date of the first documented evidence of disease progression or of death  
29  
30 252 from any cause. All the analyses will be performed in the intention-to-treat population.  
31  
32 253 Patients without events at the time of analysis will be censored at their last-known-alive  
33  
34 254 date for OS and at their last date of tumour evaluation for PFS. A further secondary  
35  
36 255 endpoint is the evaluation of quality of life using the European Organization for the  
37  
38 256 Research and Treatment of Cancer Quality of Life Questionnaire (EORTC QLQ-C30).  
39  
40 257 When data are available, the impact of baseline  $^{68}\text{Ga}$ -PET/CT and  $^{18}\text{F}$ FDG-PET/CT on  
41  
42 258 PFS will be analysed with exploratory intent. After signing the informed consent for  
43  
44 259 biomarker assessment, patients will undergo evaluation of the mutation status of MEN1,  
45  
46 260 DAXX, ATRX and RB-1 in primary tumour tissue and of miRNA in blood samples.  
47  
48 261 Assessment of the miRNA profile will be performed on the first 20 patients who agree  
49  
50 262 to participate in the biological part of the study.  
51  
52  
53  
54  
55  
56  
57  
58  
59  
60

## 264 Ethical considerations

265 The present clinical trial, supported by IRST, was authorised by the local Ethics  
266 Committee and by the Italian Medicines Agency (AIFA). The request for EudraCT  
267 registration (mandatory for studies in Europe) was send to AIFA in December 2016  
268 and we received a EudraCT number (EudraCT 2016-000767-17). However, technical  
269 problems at AIFA resulted in some clinical trials, including ours, being uploaded onto  
270 the EudraCT website after enrolment of the first patients.

271 The study is also registered on the *ClinicalTrials.gov* website (NCT03387592). The  
272 study complies with the ethical standards laid down in the 1964 Declaration of Helsinki  
273 and the principles of Good Clinical Practice guidelines (including written informed  
274 consent).

## 275 Patient and public involvement

276 This research work was performed without patient involvement in the study design,  
277 execution or outcome measures.

## 279 Statistical methods

280 The Bryant and Day design is used to estimate a sample size that takes into account  
281 both treatment activity and toxicity. Although randomisation is used to allocate patients  
282 to the two arms, no formal statistical comparisons between treatment regimens are  
283 planned. The purpose of randomisation is to reduce bias due to patient assignment to a  
284 specific treatment arm. The hypothesis for the control arm is based on literature data  
285 (23, 24).

286 An  $\alpha$  level of 0.10 (both for toxicity and DCR) and a power of 90% have been

1  
2  
3  
4 287 adopted. A DCR rate  $\geq 60\%$  and a relevant toxicity rate  $\leq 20\%$  are considered acceptable  
5  
6 288 rates, while a DCR rate  $\leq 40\%$  and a relevant toxicity rate  $\geq 40\%$  are considered  
7  
8 289 unacceptable rates. Given these hypotheses, the first step of the study will require  
9  
10 290 25 patients. If  $\geq 10$  patients with a DCR are observed and  $\geq 15$  patients do not have  
11  
12 291 significant toxicity, the study will enrol patients in the next step. A total of 53 patients  
13  
14 292 will be enrolled. If  $\geq 25$  patients with DCR and  $\geq 36$  patients without any relevant  
15  
16 293 toxicity are observed, treatment will be considered active and not toxic. This design is  
17  
18 294 used for each treatment scheme and all analyses will be performed separately. If one of  
19  
20 295 the schemes does not obtain the expected proportions of the first step, the arm will be  
21  
22 296 closed and patients will be enrolled in the other arm until the target is reached; if the  
23  
24 297 expected proportions are not reached in any arm, the study will be prematurely closed.  
25  
26 298 If no premature stop occurs, a total of 106 evaluable patients are needed (53 patients in  
27  
28 299 each arm). Taking into account a 5% dropout rate, 56 patients must be enrolled in each  
29  
30 300 arm (total 112 patients). G3-4 gastrointestinal toxicity, G4 thrombocytopenia,  
31  
32 301 prolonged G3-G4 neutropenia ( $> 7$  days) and drug-related hospitalisations are  
33  
34 302 considered relevant toxicity. The stratification factors of this study are Ki-67 (21%-55  
35  
36 303 % vs.  $> 55\%$ ) and site of primary tumour (lung vs. GEP). A subgroup analysis of the  
37  
38 304 efficacy of both treatments according to these stratification factors has been planned.  
39  
40 305 Complete response, partial response or stable disease for at least 12 weeks will be  
41  
42 306 considered as the DCR. The proportion of patients in this category will be determined  
43  
44 307 and 95% CIs for the DCR will be calculated. OS and PFS will be estimated using the  
45  
46 308 Kaplan-Meier method (two-sided 95% CIs) (24). Appropriate statistical analyses will be  
47  
48 309 performed on the basis of the data available to compare QLQ-C30 scores between  
49  
50 310 baseline and subsequent follow-up visits.  
51  
52  
53  
54  
55  
56  
57  
58  
59  
60

1  
2  
3  
4 311 When data are available, the impact of <sup>68</sup>Ga-PET/CT result on PFS will be analysed  
5  
6 312 with exploratory intent. The Shapiro-Wilk test will be used to determine the normality  
7  
8 313 distribution of each clinical, demographic and biological biomarker (25). In the event  
9  
10 314 of a non-normal distribution, nonparametric statistics will be used to analyse the  
11  
12 315 relationship between the serum levels of each marker, considered as continuous  
13  
14 316 variables, and response to treatment. In the event of normal biomarker distribution,  
15  
16 317 a parametric test will be used. All endpoints will be analysed separately for each  
17  
18 318 treatment group.  
19  
20  
21  
22

## 23 **Discussion**

24  
25 320 There is still no truly effective second-line chemotherapy for neuroendocrine  
26  
27 321 carcinoma. Overall prognosis of patients is poor, with an OS of 5 months in the  
28  
29 322 metastatic setting according to SEER (Surveillance, Epidemiology, and End Results)  
30  
31 323 data (26). Only 5% of all patients are long-term survivors. There is also a marked lack  
32  
33 324 of prognostic and predictive factors (5).  
34  
35

36  
37 325 Three phase II studies registered at *ClinicalTrials.gov* are currently investigating  
38  
39 326 second-line treatment of GEP-NECs, the first focusing on FOLFIRI and bevacizumab  
40  
41 327 (NCT02820857), the second on everolimus (NCT02113800) and the third on avelumab  
42  
43 328 (NCT03147404). Some abstracts were presented at ESMO (European Society for  
44  
45 329 Medical Oncology) 2018 and ASCO ( American Society of Clinical Oncology ) 2019  
46  
47 330 on the use of immunotherapy in GEP-NECs, all showing inconclusive results. The  
48  
49 331 SENECA study uses a promising approach to the treatment of patients with metastatic  
50  
51 332 NECs. First, both the activity and safety of 2 regimens are assessed in the same setting  
52  
53 333 with a sizeable patient population (56 patients/arm). In addition, patients are stratified  
54  
55 334 according to Ki-67 index and morphology to investigate the role of each treatment  
56  
57  
58  
59  
60

1  
2  
3  
4 335 combination in both poorly differentiated and well differentiated NECs. Another aim of  
5  
6 336 this study is to integrate both biological and metabolic imaging data in an effort to  
7  
8  
9 337 improve the current GEP-NEC classification.

10  
11 338 The duration of treatments in the metastatic setting is a dilemma in NENs and  
12  
13 339 especially in neuroendocrine carcinomas. Given the lack of evidence-based  
14  
15 340 recommendations on treatment duration of second-line chemotherapy in NECs, we  
16  
17 341 decided to opt for a fixed duration of treatments to avoid unnecessary exposure to  
18  
19  
20 342 cytotoxic agents and consequent bone marrow reserve depletion (27).

21  
22  
23 343 In conclusion, there are still no FDA/EMA (Food and Drug Administration/European  
24  
25 344 Medicines Agency)-approved second-line therapeutic options for patients with  
26  
27 345 metastatic NECs, and the SENECA trial could represent a step forward in finding novel  
28  
29 346 therapies to prolong survival and maintain quality of life. Moreover, the integration of  
30  
31 347 biological and imaging data could -lead to a better understanding of the natural history  
32  
33 348 of the disease and help to identify potential responders.

34  
35  
36 349

37  
38  
39 350

#### 40 41 351 **Confidentiality**

42  
43 352 This study will be conducted in full conformity with ICH (The International Council for  
44  
45 353 Harmonisation of Technical Requirements for Pharmaceuticals for Human Use)  
46  
47 354 Guidelines for Good Clinical Practice, Directive 2001/20/EEC of the European  
48  
49 355 Parliament and other relevant current local legislation. Participants will be allocated a  
50  
51 356 unique identification (ID) number at entry. The master list linking participant personal  
52  
53 357 information and ID number will be maintained in a separate locked cabinet and  
54  
55  
56  
57  
58  
59  
60

1  
2  
3  
4 358 password-protected hard-drive. Data will be analysed by ID number only. Patient files  
5  
6 359 and other source data will for be kept a maximum of 15 years.  
7  
8

9 360

10  
11 361

## 12 13 362 **Ethics and Dissemination**

14  
15 363 The SENECA trial, supported by IRST, involves several Italian centres and was  
16  
17 364 authorised by the local Ethics Committees of the centres taking part and by the Italian  
18  
19 365 Medicines Agency (AIFA) (see list of all centers in the supplementary table 1). After  
20  
21 366 completing the study, all data, including beneficial and adverse events, of the trial will  
22  
23 367 be communicated at scientific meetings and published in indexed peer-reviewed  
24  
25 368 journals. If shown to be effective, the therapy program will be made available to the  
26  
27 369 general public in an appropriate manner.  
28  
29  
30  
31

32 370

33  
34 371

## 35 36 372 **Abbreviations**

37  
38 373 CAPTEM, capecitabine plus temozolomide; DCR, disease control rate; GEP,  
39  
40 374 gastroenteropancreatic; NEC, neuroendocrine carcinoma; NET, neuroendocrine tumour;  
41  
42 375 OS, overall survival; PFS, progression-free survival  
43  
44  
45  
46  
47

48 376

## 49 377 **Author contributions**

50 378 AB, CL and TI designed the study and drafted the article. AB was responsible for data  
51  
52 379 acquisition. SP, SL, GDM, SS and ST provided methodological support and designed a  
53  
54 380 clinical information data extraction method for the protocol. FF performed the statistical  
55  
56 381 analysis. DS, FG, FP, RB, IL, FB and SR revised the paper for important intellectual  
57  
58  
59  
60



1  
2  
3  
4 382 content. All authors read and approved the present version of the manuscript for  
5  
6 383 submission.  
7  
8

9 384

10 385

11 386

12  
13  
14  
15  
16 387 **Data availability statement**

17  
18 388 The datasets used and analysed in the present study are available from the  
19  
20 389 corresponding author on reasonable request.  
21  
22

23 390

24  
25 391 **Funding**

26  
27 392 The study was conducted in the absence of any commercial or financial relationships  
28  
29 393 that could be construed as a potential conflict of interest.  
30  
31

32 394

33  
34 395 **Conflicts of interest**

35  
36 396 The authors declare no conflict of interest.  
37  
38

39 397

40  
41 398 **Acknowledgements**

42  
43 399 *SENECA study Team investigators*: Davide Campana, Davide Pastorelli, Nicola  
44  
45 400 Silvestris, Francesco Silvestris, Angela Buonadonna and Giuseppe Badalamenti.

46  
47 401 The authors thank Gráinne Tierney and Cristiano Verna for editorial assistance.  
48  
49  
50  
51  
52  
53  
54  
55  
56  
57  
58  
59  
60

## 403 **References**

- 404 1. Kulke MH, Shah MH, Benson AB 3<sup>rd</sup>, Bergsland E, Berlin JD, Blaszkowsky LS, et  
405 al. Neuroendocrine tumors, version 1.2015. *J Natl Compr Canc Netw* (2015)  
406 13(1):78-108
- 407 2. Modlin IM, Moss SF, Chung DC, Jensen RT, Snyderwine E. Priorities for  
408 improving the management of gastroenteropancreatic neuroendocrine tumors. *J*  
409 *Natl Cancer Inst* (2008)100(18):1282-9. doi: 10.1093/jnci/djn275
- 410 3. Yao YC, Hassan M, Phan A, Dagohoy C, Leary C, Mares JE, et al. One hundred  
411 years after “carcinoid”: epidemiology of and prognostic factors for neuroendocrine  
412 tumors in 35,825 cases in the United States. *J Clin Oncol* (2008) 26(18):3063-72
- 413 4. Fraenkel M, Kim M, Faggiano A, de Herder WW, Valk GD; Knowledge NETwork.  
414 Incidence of gastroenteropancreatic neuroendocrine tumours: a systematic review  
415 of the literature. *Endocr Relat Cancer* (2014) 21(3):R153-63. doi: 10.1530/ERC-  
416 13-0125
- 417 5. Lloyd RV, Osamura RY, Klöppel G, Rosai J. WHO classification of tumours of  
418 endocrine organs. 4th ed (2017). Lyon: International Agency for Research on  
419 Cancer (IARC)
- 420 6. Sorbye H, Welin S, Langer SW, Vestermark LW, Holt N, Osterlund P, et al.  
421 Predictive and prognostic factors for treatment and survival in 305 patients with  
422 advanced gastrointestinal neuroendocrine carcinoma (WHO G3): the NORDIC  
423 NEC study. *Ann Oncol* (2013) 24(1):152-60.
- 424 7. Heetfeld M, Chougnet CN, Olsen IH, Rinke A, Borbath I, Crespo G, et al.  
425 Characteristics and treatment of patients with G3 gastroenteropancreatic  
426 neuroendocrine neoplasms. *Endocr Relat Cancer* (2015) 22(4):657-64. doi:

- 1  
2  
3  
4 427 10.1530/ERC-15-0119  
5  
6 428 8. Walter T, Malka D, Hentic O, Lombard-Bohas C, Le Malicot K, Smith D, et al.  
7  
8  
9 429 Evaluating bevacizumab in combination with FOLFIRI after the failure of  
10  
11 430 platinum-etoposide regimen in patients with advanced poorly  
12  
13 431 differentiated neuroendocrine carcinoma: The PRODIGE 41-BEVANEC  
14  
15 432 randomized phase II study. *Dig Liver Dis* (2018) 50(2):195-8. doi:  
16  
17 433 10.1016/j.dld.2017.11.020  
18  
19  
20 434 9. Hadoux J, Malka D, Planchard D, Scoazec JY, Caramella C, Guigay J, et al. Post-  
21  
22 435 first-line FOLFOX chemotherapy for grade 3 neuroendocrine carcinoma. *Endocr*  
23  
24 436 *Relat Cancer* (2015) 22(3):289-98. doi: 10.1530/ERC-15-0075  
25  
26  
27 437 10. Olsen IH, Sørensen JB, Federspiel B, Kjaer A, Hansen CP, Knigge U, et al.  
28  
29 438 Temozolomide as second or third line treatment of patients with neuroendocrine  
30  
31 439 carcinomas. *Sci World J* (2012) 2012:2012:170496. doi: 10.1100/2012/170496  
32  
33  
34 440 11. Hentic O, Hammel P, Couvelard A, Rebours V, Zappa M, Palazzo M, et al.  
35  
36 441 FOLFIRI regimen: an effective second-line chemotherapy after failure of  
37  
38 442 etoposide-platinum combination in patients with neuroendocrine carcinomas grade  
39  
40 443 3. *Endocr Relat Cancer* (2012) 9(6):751-7. doi: 10.1530/ERC-12-0002  
41  
42  
43 444 12. Welin S, Sorbye H, Sebjornsen S, Knappskog S, Busch C, Oberg K. Clinical effect  
44  
45 445 of temozolomide-based chemotherapy in poorly differentiated endocrine carcinoma  
46  
47 446 after progression on first-line chemotherapy. *Cancer* (2011) 117(20):4617-22. doi:  
48  
49 447 10.1002/cncr.26124  
50  
51  
52 448 13. Noda K, Nishiwaki Y, Kawahara M, Negoro S, Sugiura T, Yokoyama A, et al.  
53  
54 449 Irinotecan plus cisplatin compared with etoposide plus cisplatin for extensive small-  
55  
56 450 cell lung cancer. *N Engl J Med* (2002) 346(2):85-91. doi: 10.1056/NEJMoa003034  
57  
58  
59  
60

- 1  
2  
3  
4 451 14. Derks JL, Leblay N, Thunnissen E, van Suylen RJ, den Bakker M, Groen HJM, et  
5  
6 452 al. Molecular subtypes of pulmonary large-cell neuroendocrine carcinoma predict  
7  
8 453 chemotherapy treatment outcome. *Clin Cancer Res* (2018) 24(1):33-42. doi:  
9  
10 454 10.1158/1078-0432.CCR-17-1921  
11  
12  
13 455 15. Tang LH, Untch BR, Reidy DL, O'Reilly E, Dhall D, Jih L, et al. Well-  
14  
15 456 differentiated neuroendocrine tumors with a morphologically apparent high-grade  
16  
17 457 component: a pathway distinct from poorly differentiated neuroendocrine  
18  
19 458 carcinomas. *Clin Cancer Res* (2016) 22(4):1011-7. doi: 10.1158/1078-0432.CCR-  
20  
21 459 15-0548  
22  
23  
24 460 16. Liverani C, Bongiovanni A, Mercatali L, Foca F, Pieri F, De Vita A, Spadazzi C,  
25  
26 461 Miserocchi G, Recine F, Riva N, Nicolini S, Severi S, Martinelli G, Ibrahim T.  
27  
28 462 Grading of Neuroendocrine Carcinomas: Correlation of 68Ga-PET/CT Scan with  
29  
30 463 Tissue Biomarkers. *Dis Markers*. 2018 Dec 2;2018:6878409.  
31  
32  
33 464 17. Grolmusz VK, Kövesdi A, Borcs K, Igaz P, Patócs A. Prognostic relevance of  
34  
35 465 proliferation-related miRNAs in pancreatic neuroendocrine neoplasms *Eur J*  
36  
37 466 *Endocrinol* (2018) 179(4):219-28. doi: 10.1530/EJE-18-0305  
38  
39  
40 467 18. Gill P, Kim E, Chua TC, Clifton-Bligh RJ, Nahm CB, Mittal A, et al. MiRNA-3653  
41  
42 468 is a potential tissue biomarker for increased metastatic risk in pancreatic  
43  
44 469 neuroendocrine tumours. *Endocr Pathol* (2019). doi: 10.1007/s12022-019-9570-y  
45  
46 470 [Epub ahead of print]  
47  
48  
49 471 19. Panarelli N, Tyryshkin K, Wong JJM, Majewski A, Yang X, Scognamiglio T, et al.  
50  
51 472 Evaluating gastroenteropancreatic neuroendocrine tumors through microRNA  
52  
53 473 sequencing. *Endocr Relat Cancer* (2019) 26(1):47-57. doi: 10.1530/ERC-18-0244  
54  
55  
56 474 20. Malczewska A, Kidd M, Matar S, Kos-Kudla B, Modlin IM. A comprehensive  
57  
58  
59  
60

- 1  
2  
3  
4 475 assessment of the role of mirnas as biomarkers in gastroenteropancreatic  
5  
6 476 neuroendocrine tumors. *Neuroendocrinology* (2018)107(1):73-90. doi:  
7  
8  
9 477 10.1159/000487326  
10  
11 478 21. Bongiovanni A, Riva N, Ricci M, Liverani C, La Manna F, De Vita A, et al. First-  
12  
13 479 line chemotherapy in patients with metastatic gastroenteropancreatic  
14  
15 480 neuroendocrinecarcinoma. *Onco Targets Ther* (2015) 8:3613-9. doi:  
16  
17 481 10.2147/OTT.S91971  
18  
19  
20 482 22. Sansovini M, Severi S, Ianniello A, Nicolini S, Fantini L, Mezzenga E, Ferroni F,  
21  
22 483 Scarpi E, Monti M, Bongiovanni A, Cingarlini S, Grana CM, Bodei L, Paganelli G.  
23  
24 484 Long-term follow-up and role of  
25  
26 485 FDG PET in advanced pancreatic neuroendocrine patients treated with 177Lu-D  
27  
28 486 OTATATE. *Eur J Nucl Med Mol Imaging*. 2017 Mar;44(3):490-499.  
29  
30  
31 487 23. Sorbye H, Welin S, Langer SW, Vestermark LW, Holt N, Osterlund P, et al.  
32  
33 488 Predictive and prognostic factors for treatment and survival in 305 patients with  
34  
35 489 advanced Gastrointestinal neuroendocrine carcinoma (WHO G3):  
36  
37 490 the NORDIC NEC study. *Ann Oncol* (2013) 24(1):152-60. doi:  
38  
39 491 10.1093/annonc/mds276  
40  
41  
42 492 24. Perren A, Couvelard A, Scoazec JY, Costa F, Borbath I, Delle Fave G, et al.  
43  
44 493 ENETS consensus guidelines for the standards of care in neuroendocrine tumors:  
45  
46 494 pathology: diagnosis and prognostic stratification. *Neuroendocrinology* (2017)  
47  
48 495 105(3):196-200. doi: 10.1159/000457956  
49  
50  
51 496 25. Sorbye H, Köhne CH, Sargent DJ, Glimelius B. Patient characteristics and  
52  
53 497 stratification in medical treatment studies for metastatic colorectal cancer: a  
54  
55 498 proposal for standardization of patient characteristic reporting and stratification.  
56  
57  
58  
59  
60

1  
2  
3  
4 499 *Ann Oncol* (2007) 18(10):1666-72.  
5

6 500 26. Kaplan EL, Meier P. Nonparametric estimation from incomplete observations.  
7  
8  
9 501 *J. Amer. Statist Assoc* (1958) 53:457-81.

10  
11 502 27. Strosberg JR, Fine RL, Choi J, Nasir A, Coppola D, Chen DT, et al. First-line  
12  
13 503 chemotherapy with capecitabine and temozolomide in patients with metastatic  
14  
15 504 pancreatic endocrine carcinomas. *Cancer* (2011) 117 (2):268-75.  
16

17  
18 505  
19

20 506  
21

22 507  
23

24  
25 508 **Figure legend**

26  
27 509 **FIGURE 1** | SENECA study design.  
28

29 510  
30  
31  
32  
33  
34  
35  
36  
37  
38  
39  
40  
41  
42  
43  
44  
45  
46  
47  
48  
49  
50  
51  
52  
53  
54  
55  
56  
57  
58  
59  
60

1  
2  
3  
4  
5  
6  
7  
8  
9  
10  
11  
12  
13  
14  
15  
16  
17  
18  
19  
20  
21  
22  
23  
24  
25  
26  
27  
28  
29  
30  
31  
32  
33  
34  
35  
36  
37  
38  
39  
40  
41  
42  
43  
44  
45  
46  
47  
48  
49  
50  
51  
52  
53  
54  
55  
56  
57  
58  
59  
60

Fig. 1



FIGURE 1 | SENECA study design.

90x91mm (300 x 300 DPI)

| <b>Center Ethical Committee</b>                                                         | <b>Approval ID number</b> |
|-----------------------------------------------------------------------------------------|---------------------------|
| Comitato Etico della Romagna CEROM                                                      | 1660                      |
| Comitato Etico di INT - Milano                                                          | 146/16                    |
| Comitato etico per la sperimentazione clinica - Comprensorio di Bolzano                 | 8-2017                    |
| Comitato Etico dell'Area Vasta Emilia Nord                                              | 220/16                    |
| Comitato Etico Area Vasta Nord Ovest- Pisa                                              | 1220/2016                 |
| Comitato Etico IRCCS "De Bellis" - Castellana Grotte                                    | 34/CE De Bellis           |
| Comitato Etico dell'Area Vasta Emilia Nord                                              | 24-2017                   |
| Istituto Oncologico Veneto - Padova                                                     | 2016/63                   |
| Comitato Etico ASL - Lecce                                                              | 140686                    |
| Comitato Etico di Area Vasta Emilia Centro (CE-AVEC)                                    | 32/2017/O/Sper            |
| Comitato Etico Regionale Marche di AOU - Ospedali Riuniti di Ancona                     | 2017 0068 OR              |
| Comitato Etico dell'Università Campus Bio-Medico di Roma                                | 02.17                     |
| Comitato Etico per la Pratica Clinica dell'ULSS 1 Dolomiti,                             | 399/CE Dolomiti           |
| Comitato Etico Istituto Tumori - Bari                                                   | 621/CE                    |
| Comitato Etico Interregionale - Bari                                                    | 5165                      |
| Comitato Etico Palermo 1                                                                | 02/2018                   |
| Comitato Etico Unico Regionale (C.E.U.R.)                                               | Ceur-2018-Sper-076-CRO    |
| Comitato etico per la Sperimentazione Clinica (CESC) delle Province di Verona e Rovigo  | 2350CESC                  |
| Comitato Etico degli IRCCS Istituto Europeo di Oncologia e Centro Cardiologico Monzino. | IEO 1133 - RE2189/NC      |
| Comitato Etico Interaziendale A.O.U. San Luigi Gonzaga                                  | 192/2019                  |
| Comitato Etico di Brescia                                                               | 3729                      |
| Comitato Etico Area Vasta Centro - AOU Careggi                                          | 12447_spe                 |

**Supplementary Table 1. List of Ethical committee of Italian Centers with the ID approval number involved in SENECA trial**



# CONSORT 2010 checklist of information to include when reporting a randomised trial\*

| Section/Topic | Item No | Checklist item | Reported on page No |
|---------------|---------|----------------|---------------------|
|---------------|---------|----------------|---------------------|

## Title and abstract

- 1a Identification as a randomised trial in the title
- 1b Structured summary of trial design, methods, results, and conclusions (for specific guidance see CONSORT for abstracts)

1  
3

## Introduction

- 2a Scientific background and explanation of rationale
- 2b Specific objectives or hypotheses

5-7  
7

## Methods

### Trial design

- 3a Description of trial design (such as parallel, factorial) including allocation ratio
- 3b Important changes to methods after trial commencement (such as eligibility criteria), with reasons

8-11

### Participants

- 4a Eligibility criteria for participants
- 4b Settings and locations where the data were collected

14-15  
9

### Interventions

- 5 The interventions for each group with sufficient details to allow replication, including how and when they were actually administered

8, 9

### Outcomes

- 6a Completely defined pre-specified primary and secondary outcome measures, including how and when they were assessed
- 6b Any changes to trial outcomes after the trial commenced, with reasons

10, 11  
N/A

### Sample size

- 7a How sample size was determined
- 7b When applicable, explanation of any interim analyses and stopping guidelines

12  
N/A

### Randomisation:

- 8a Method used to generate the random allocation sequence
- 8b Type of randomisation; details of any restriction (such as blocking and block size)

12  
12

- 9 Mechanism used to implement the random allocation sequence (such as sequentially numbered containers), describing any steps taken to conceal the sequence until interventions were assigned

12

### Implementation

- 10 Who generated the random allocation sequence, who enrolled participants, and who assigned participants to interventions

12

- 11a If done, who was blinded after assignment to interventions (for example, participants, care providers, those

N/A

1  
2  
3  
4  
5  
6  
7  
8  
9  
10  
11  
12  
13  
14  
15  
16  
17  
18  
19  
20  
21  
22  
23  
24  
25  
26  
27  
28  
29  
30  
31  
32  
33  
34  
35  
36  
37  
38  
39  
40  
41  
42  
43  
44  
45  
46  
47  
48  
49  
50  
51  
52  
53  
54  
55  
56  
57  
58  
59  
60

Statistical methods  
 11b assessing outcomes) and how  
 12a If relevant, description of the similarity of interventions  
 12b Statistical methods used to compare groups for primary and secondary outcomes  
 Methods for additional analyses, such as subgroup analyses and adjusted analyses  
 N/A  
 12, 13  
 12

**Results**

Participant flow (a diagram is strongly recommended)  
 13a For each group, the numbers of participants who were randomly assigned, received intended treatment, and were analysed for the primary outcome  
 13b For each group, losses and exclusions after randomisation, together with reasons  
 14a Dates defining the periods of recruitment and follow-up  
 14b Why the trial ended or was stopped  
 8, 12  
 12  
 N/A  
 N/A

Baseline data  
 15 A table showing baseline demographic and clinical characteristics for each group  
 16 For each group, number of participants (denominator) included in each analysis and whether the analysis was by original assigned groups  
 N/A  
 N/A

Outcomes and estimation  
 17a For each primary and secondary outcome, results for each group, and the estimated effect size and its precision (such as 95% confidence interval)  
 17b For binary outcomes, presentation of both absolute and relative effect sizes is recommended  
 12  
 12

Ancillary analyses  
 18 Results of any other analyses performed, including subgroup analyses and adjusted analyses, distinguishing pre-specified from exploratory  
 12

**Harms**

19 All important harms or unintended effects in each group (for specific guidance see CONSORT for harms)  
 12

**Discussion**

Limitations  
 20 Trial limitations, addressing sources of potential bias, imprecision, and, if relevant, multiplicity of analyses  
 4

Generalisability  
 21 Generalisability (external validity, applicability) of the trial findings  
 13, 14

Interpretation  
 22 Interpretation consistent with results, balancing benefits and harms, and considering other relevant evidence  
 13, 14

**Other information**

Registration  
 23 Registration number and name of trial registry  
 13

Protocol  
 24 Where the full trial protocol can be accessed, if available  
 14, 15

Funding  
 25 Sources of funding and other support (such as supply of drugs), role of funders  
 16

\*We strongly recommend reading this statement in conjunction with the CONSORT 2010 Explanation and Elaboration for important clarifications on all the items. If relevant, we also recommend reading CONSORT extensions for cluster randomised trials, non-inferiority and equivalence trials, non-pharmacological treatments, herbal interventions, and pragmatic trials. Additional extensions are forthcoming: for those and for up to date references relevant to this checklist, see [www.consort-statement.org](http://www.consort-statement.org).

1  
2  
3  
4  
5  
6  
7  
8  
9  
10  
11  
12  
13  
14  
15  
16  
17  
18  
19  
20  
21  
22  
23  
24  
25  
26  
27  
28  
29  
30  
31  
32  
33  
34  
35  
36  
37  
38  
39  
40  
41  
42  
43  
44  
45  
46  
47  
48  
49  
50  
51  
52  
53  
54  
55  
56  
57  
58  
59  
60

1  
2  
3  
4  
5  
6  
7  
8  
9  
10  
11  
12  
13  
14  
15  
16  
17  
18  
19  
20  
21  
22  
23  
24  
25  
26  
27  
28  
29  
30  
31  
32  
33  
34  
35  
36  
37  
38  
39  
40  
41  
42  
43  
44  
45  
46  
47  
48  
49  
50  
51  
52  
53  
54  
55  
56  
57  
58  
59  
60

|    |                                                                                                                                                                                                                                                                                          |    |                            |
|----|------------------------------------------------------------------------------------------------------------------------------------------------------------------------------------------------------------------------------------------------------------------------------------------|----|----------------------------|
| 1  | Descriptive title identifying the study design, population, interventions, and, if applicable, trial acronym                                                                                                                                                                             | 1  | Title                      |
| 2  | Trial identifier and registry name. If not yet registered, name of intended registry                                                                                                                                                                                                     | 2a | Trial registration         |
| 3  | All items from the World Health Organization Trial Registration Data Set                                                                                                                                                                                                                 | 2b |                            |
| 4  | Date and version identifier                                                                                                                                                                                                                                                              | 3  | Protocol version           |
| 5  | Sources and types of financial, material, and other support                                                                                                                                                                                                                              | 4  | Funding                    |
| 6  | Names, affiliations, and roles of protocol contributors                                                                                                                                                                                                                                  | 5a | Roles and responsibilities |
| 7  | Name and contact information for the trial sponsor                                                                                                                                                                                                                                       | 5b |                            |
| 8  | Role of study sponsor and funders, if any, in study design; collection, management, analysis, and interpretation of data; writing of the report; and the decision to submit the report for publication, including whether they will have ultimate authority over any of these activities | 5c |                            |
| 9  | Composition, roles, and responsibilities of the coordinating centre, steering committee, endpoint adjudication committee, data management team, and other individuals or groups overseeing the trial, if applicable (see Item 21a for data monitoring committee)                         | 5d |                            |
| 10 | Description of research question and justification for undertaking the trial, including summary of relevant studies (published and unpublished) examining benefits and harms for each intervention                                                                                       | 6a | Background and rationale   |
| 11 | Explanation for choice of comparators                                                                                                                                                                                                                                                    | 6b |                            |
| 12 | Specific objectives or hypotheses                                                                                                                                                                                                                                                        | 7  | Objectives                 |
| 13 | Description of trial design including type of trial (eg, parallel group, crossover, factorial, single group), allocation ratio, and framework (eg, superiority, equivalence, noninferiority, exploratory)                                                                                | 8  | Trial design               |

**Introduction**

**Administrative information**

SPRIT 2013 Checklist: Recommended items to address in a clinical trial protocol and related documents\*

STANDARD PROTOCOL ITEMS: RECOMMENDATIONS FOR INTERVENTIONAL TRIALS



|    |     |                                                                     |                                                                               |
|----|-----|---------------------------------------------------------------------|-------------------------------------------------------------------------------|
| 1  |     |                                                                     |                                                                               |
| 2  |     |                                                                     |                                                                               |
| 3  |     |                                                                     |                                                                               |
| 4  |     |                                                                     |                                                                               |
| 5  |     |                                                                     | interventions                                                                 |
| 6  |     |                                                                     | that is unavailable to those who enrol participants or assign                 |
| 7  |     |                                                                     | restriction (eg, blocking) should be provided in a separate document          |
| 8  |     |                                                                     | To reduce predictability of a random sequence, details of any planned         |
| 9  |     |                                                                     | generated random numbers), and list of any factors for stratification.        |
| 10 |     | generation                                                          |                                                                               |
| 11 | 16a | Sequence                                                            | Method of generating the allocation sequence (eg, computer-                   |
| 12 |     |                                                                     |                                                                               |
| 13 |     | Allocation:                                                         |                                                                               |
| 14 |     |                                                                     |                                                                               |
| 15 |     | <b>Methods: Assignment of interventions (for controlled trials)</b> |                                                                               |
| 16 |     |                                                                     |                                                                               |
| 17 |     |                                                                     | target sample size                                                            |
| 18 | 15  | Recruitment                                                         | Strategies for achieving adequate participant enrolment to reach              |
| 19 |     |                                                                     |                                                                               |
| 20 |     |                                                                     | assumptions supporting any sample size calculations                           |
| 21 |     |                                                                     | and how it was determined, including clinical and statistical                 |
| 22 | 14  | Sample size                                                         | Estimated number of participants needed to achieve study objectives           |
| 23 |     |                                                                     |                                                                               |
| 24 |     |                                                                     | diagram is highly recommended (see Figure)                                    |
| 25 |     |                                                                     | washouts), assessments, and visits for participants. A schematic              |
| 26 |     | timeline                                                            |                                                                               |
| 27 | 13  | Participant                                                         | Time schedule of enrolment, interventions (including any run-ins and          |
| 28 |     |                                                                     |                                                                               |
| 29 |     |                                                                     | harm outcomes is strongly recommended                                         |
| 30 |     |                                                                     | outcome. Explanation of the clinical relevance of chosen efficacy and         |
| 31 |     |                                                                     | aggregation (eg, median, proportion), and time point for each                 |
| 32 |     |                                                                     | (eg, change from baseline, final value, time to event), method of             |
| 33 |     |                                                                     | measurement variable (eg, systolic blood pressure), analysis metric           |
| 34 |     |                                                                     | Primary, secondary, and other outcomes, including the specific                |
| 35 | 12  | Outcomes                                                            |                                                                               |
| 36 |     |                                                                     |                                                                               |
| 37 |     |                                                                     | prohibited during the trial                                                   |
| 38 | 11d |                                                                     | Relevant concomitant care and interventions that are permitted or             |
| 39 |     |                                                                     |                                                                               |
| 40 |     |                                                                     | laboratory tests)                                                             |
| 41 |     |                                                                     | procedures for monitoring adherence (eg, drug tablet return,                  |
| 42 |     |                                                                     |                                                                               |
| 43 | 11c |                                                                     | Strategies to improve adherence to intervention protocols, and any            |
| 44 |     |                                                                     |                                                                               |
| 45 |     |                                                                     | participant request, or improving/worsening disease)                          |
| 46 |     |                                                                     | given trial participant (eg, drug dose change in response to harms,           |
| 47 | 11b |                                                                     | Criteria for discontinuing or modifying allocated interventions for a         |
| 48 |     |                                                                     |                                                                               |
| 49 |     |                                                                     | including how and when they will be administered                              |
| 50 | 11a | Interventions                                                       | Interventions for each group with sufficient detail to allow replication,     |
| 51 |     |                                                                     |                                                                               |
| 52 |     |                                                                     | interventions (eg, surgeons, psychotherapists)                                |
| 53 |     |                                                                     | criteria for study centres and individuals who will perform the               |
| 54 | 10  | Eligibility criteria                                                | Inclusion and exclusion criteria for participants. If applicable, eligibility |
| 55 |     |                                                                     |                                                                               |
| 56 |     |                                                                     |                                                                               |
| 57 |     |                                                                     | list of study sites can be obtained                                           |
| 58 |     |                                                                     | and list of countries where data will be collected. Reference to where        |
| 59 | 9   | Study setting                                                       | Description of study settings (eg, community clinic, academic hospital)       |
| 60 |     |                                                                     |                                                                               |

**Methods: Participants, interventions, and outcomes**



|    |     |                                                                              |                                                                               |
|----|-----|------------------------------------------------------------------------------|-------------------------------------------------------------------------------|
| 1  |     |                                                                              |                                                                               |
| 2  |     |                                                                              |                                                                               |
| 3  |     |                                                                              |                                                                               |
| 4  |     |                                                                              |                                                                               |
| 5  |     |                                                                              | level dataset, and statistical code                                           |
| 6  | 31c | Plans, if any, for granting public access to the full protocol, participant- |                                                                               |
| 7  |     |                                                                              | writers                                                                       |
| 8  |     |                                                                              |                                                                               |
| 9  | 31b | Authorship eligibility guidelines and any intended use of professional       |                                                                               |
| 10 |     |                                                                              |                                                                               |
| 11 |     |                                                                              | data sharing arrangements), including any publication restrictions            |
| 12 |     |                                                                              | groups (eg, via publication, reporting in results databases, or other         |
| 13 |     |                                                                              | participants, healthcare professionals, the public, and other relevant        |
| 14 | 31a | Plans for investigators and sponsor to communicate trial results to          | Dissemination policy                                                          |
| 15 |     |                                                                              |                                                                               |
| 16 |     |                                                                              | compensation to those who suffer harm from trial participation                |
| 17 | 30  | Provisions, if any, for ancillary and post-trial care, and for               | Ancillary and post-trial care                                                 |
| 18 |     |                                                                              |                                                                               |
| 19 |     |                                                                              | investigators                                                                 |
| 20 |     |                                                                              |                                                                               |
| 21 |     |                                                                              | disclosure of contractual agreements that limit such access for               |
| 22 | 29  | Statement of who will have access to the final trial dataset, and            | Access to data                                                                |
| 23 |     |                                                                              |                                                                               |
| 24 |     |                                                                              | the overall trial and each study site                                         |
| 25 | 28  | Financial and other competing interests for principal investigators for      | Declaration of interests                                                      |
| 26 |     |                                                                              |                                                                               |
| 27 |     |                                                                              | before, during, and after the trial                                           |
| 28 |     |                                                                              | be collected, shared, and maintained in order to protect confidentiality      |
| 29 | 27  | How personal information about potential and enrolled participants will      | Confidentiality                                                               |
| 30 |     |                                                                              |                                                                               |
| 31 |     |                                                                              | and biological specimens in ancillary studies, if applicable                  |
| 32 | 26b | Additional consent provisions for collection and use of participant data     |                                                                               |
| 33 |     |                                                                              |                                                                               |
| 34 |     |                                                                              | participants or authorised surrogates, and how (see item 32)                  |
| 35 | 26a | Who will obtain informed consent or assent from potential trial              | Consent or assent                                                             |
| 36 |     |                                                                              |                                                                               |
| 37 |     |                                                                              | regulators)                                                                   |
| 38 |     |                                                                              | (eg, investigators, REC/IRBs, trial participants, trial registries, journals, |
| 39 |     |                                                                              | changes to eligibility criteria, outcomes, analyses) to relevant parties      |
| 40 | 25  | Plans for communicating important protocol modifications (eg,                | Protocol amendments                                                           |
| 41 |     |                                                                              |                                                                               |
| 42 | 24  | Plans for seeking research ethics committee/institutional review board       | Research ethics approval                                                      |
| 43 |     |                                                                              | (REC/IRB) approval                                                            |
| 44 |     |                                                                              |                                                                               |
| 45 |     |                                                                              |                                                                               |
| 46 |     |                                                                              |                                                                               |
| 47 |     |                                                                              |                                                                               |
| 48 |     |                                                                              |                                                                               |
| 49 |     |                                                                              |                                                                               |
| 50 |     |                                                                              | sponsor                                                                       |
| 51 |     |                                                                              | whether the process will be independent from investigators and the            |
| 52 | 23  | Frequency and procedures for auditing trial conduct, if any, and             | Auditing                                                                      |
| 53 |     |                                                                              |                                                                               |
| 54 |     |                                                                              | of trial interventions or trial conduct                                       |
| 55 |     |                                                                              | spontaneously reported adverse events and other unintended effects            |
| 56 | 22  | Plans for collecting, assessing, reporting, and managing solicited and       | Harms                                                                         |
| 57 |     |                                                                              |                                                                               |
| 58 |     |                                                                              | decision to terminate the trial                                               |
| 59 | 21b | who will have access to these interim results and make the final             |                                                                               |
| 60 |     | Description of any interim analyses and stopping guidelines, including       |                                                                               |

1  
2  
3  
4  
5  
6  
7  
8  
9  
10  
11  
12  
13  
14  
15  
16  
17  
18  
19  
20  
21  
22  
23  
24  
25  
26  
27  
28  
29  
30  
31  
32  
33  
34  
35  
36  
37  
38  
39  
40  
41  
42  
43  
44  
45  
46  
47  
48  
49  
50  
51  
52  
53  
54  
55  
56  
57  
58  
59  
60

**Appendices**

|    |                      |                                                                                                                                                                                                |
|----|----------------------|------------------------------------------------------------------------------------------------------------------------------------------------------------------------------------------------|
| 32 | Informed consent     | Model consent form and other related documentation given to participants and authorised surrogates                                                                                             |
| 33 | Biological specimens | Plans for collection, laboratory evaluation, and storage of biological specimens for genetic or molecular analysis in the current trial and for future use in ancillary studies, if applicable |

\*It is strongly recommended that this checklist be read in conjunction with the SPIRIT 2013 Explanation & Elaboration for important clarification on the items. Amendments to the protocol should be tracked and dated. The SPIRIT checklist is copyrighted by the SPIRIT Group under the Creative Commons "Attribution-NonCommercial-NoDerivs 3.0 Unported" license.

The above items have been advised when applicable. The copyright author.

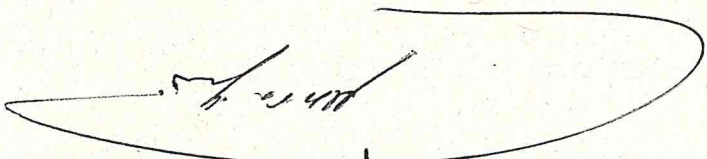

1  
2  
3  
4  
5  
6  
7  
8  
9  
10  
11  
12  
13  
14  
15  
16  
17  
18  
19  
20  
21  
22  
23  
24  
25  
26  
27  
28  
29  
30  
31  
32  
33  
34  
35  
36  
37  
38  
39  
40  
41  
42  
43  
44  
45  
46  
47  
48  
49  
50  
51  
52  
53  
54  
55  
56  
57  
58  
59  
60



# BMJ Open

## Randomized Phase II Trial of CAPTEM or FOLFIRI as Second-line Therapy in Neuroendocrine Carcinomas and Exploratory Analysis of Predictive Role of PET/CT Imaging and Biological Markers (SENECA Trial): A Study Protocol

|                                 |                                                                                                                                                                                                                                                                                                                                                                                                                                                                                                                                                                                                                                                                                                                                                                                                                                                                                                                                                                                                                                                                                                                                                                                                                                                                                                                                                                                                                                                                                                                                                                                                                                                                                                                          |
|---------------------------------|--------------------------------------------------------------------------------------------------------------------------------------------------------------------------------------------------------------------------------------------------------------------------------------------------------------------------------------------------------------------------------------------------------------------------------------------------------------------------------------------------------------------------------------------------------------------------------------------------------------------------------------------------------------------------------------------------------------------------------------------------------------------------------------------------------------------------------------------------------------------------------------------------------------------------------------------------------------------------------------------------------------------------------------------------------------------------------------------------------------------------------------------------------------------------------------------------------------------------------------------------------------------------------------------------------------------------------------------------------------------------------------------------------------------------------------------------------------------------------------------------------------------------------------------------------------------------------------------------------------------------------------------------------------------------------------------------------------------------|
| Journal:                        | <i>BMJ Open</i>                                                                                                                                                                                                                                                                                                                                                                                                                                                                                                                                                                                                                                                                                                                                                                                                                                                                                                                                                                                                                                                                                                                                                                                                                                                                                                                                                                                                                                                                                                                                                                                                                                                                                                          |
| Manuscript ID                   | bmjopen-2019-034393.R4                                                                                                                                                                                                                                                                                                                                                                                                                                                                                                                                                                                                                                                                                                                                                                                                                                                                                                                                                                                                                                                                                                                                                                                                                                                                                                                                                                                                                                                                                                                                                                                                                                                                                                   |
| Article Type:                   | Protocol                                                                                                                                                                                                                                                                                                                                                                                                                                                                                                                                                                                                                                                                                                                                                                                                                                                                                                                                                                                                                                                                                                                                                                                                                                                                                                                                                                                                                                                                                                                                                                                                                                                                                                                 |
| Date Submitted by the Author:   | 14-May-2020                                                                                                                                                                                                                                                                                                                                                                                                                                                                                                                                                                                                                                                                                                                                                                                                                                                                                                                                                                                                                                                                                                                                                                                                                                                                                                                                                                                                                                                                                                                                                                                                                                                                                                              |
| Complete List of Authors:       | Bongiovanni, Alberto; Istituto Scientifico Romagnolo per lo Studio e la Cura dei Tumori (IRST) IRCCS, Osteoncology and Rare Tumors Center Liverani, Chiara; Istituto Scientifico Romagnolo per lo Studio e la Cura dei Tumori (IRST) IRCCS, Osteoncology and Rare Tumors Center Pusceddu, Sara; Istituto Nazionale per lo Studio e la Cura dei Tumori, Department of Medical Oncology<br>Leo, Silvana; Ospedale Vito Fazzi, Oncology Unit<br>Di Meglio, Giovanni; Ospedale di Bolzano, Oncology Unit<br>Tamberi, Stefano; Ospedale degli Infermi di Faenza<br>Santini, Daniele; Campus Bio-Medico University, Department of Medical Oncology<br>Gelsomino, Fabio; Azienda Ospedaliero-Universitaria di Modena, Department of Oncology and Hematology<br>Pucci, Francesca; Azienda Ospedaliero-Universitaria di Parma, Medical Oncology Unit<br>Berardi, Rossana; University Hospital of Ancona Umberto I G M Lancisi G Salesi, Oncology Clinic<br>Lolli, Ivan; Istituto Nazionale di Ricovero e Cura a Carattere Scientifico Saverio de Bellis, Department of Oncology<br>Bergamo, Francesca; Istituto Oncologico Veneto Istituto di Ricovero e Cura a Carattere Scientifico, Department of Clinical and Experimental Oncology<br>Ricci, Sergio; Santa Chiara Hospital, Internal Medicine and Medical Oncology<br>Foca, Flavia; Istituto Scientifico Romagnolo per lo Studio e la Cura dei Tumori (IRST) IRCCS, Unit of Biostatistics and Clinical Trials<br>Severi, Stefano; Nuclear Medicine Unit Istituto Scientifico Romagnolo per lo Studio e la Cura dei Tumori (IRST) IRCCS<br>Ibrahim, Toni; Istituto Scientifico Romagnolo per lo Studio e la Cura dei Tumori (IRST) IRCCS, Osteoncology and Rare Tumors Center |
| <b>Primary Subject Heading</b>: | Oncology                                                                                                                                                                                                                                                                                                                                                                                                                                                                                                                                                                                                                                                                                                                                                                                                                                                                                                                                                                                                                                                                                                                                                                                                                                                                                                                                                                                                                                                                                                                                                                                                                                                                                                                 |
| Secondary Subject Heading:      | Oncology                                                                                                                                                                                                                                                                                                                                                                                                                                                                                                                                                                                                                                                                                                                                                                                                                                                                                                                                                                                                                                                                                                                                                                                                                                                                                                                                                                                                                                                                                                                                                                                                                                                                                                                 |
| Keywords:                       | CAPTEM, neuroendocrine carcinoma, FOLFIRI, capecitabine, temozolomide, second-line                                                                                                                                                                                                                                                                                                                                                                                                                                                                                                                                                                                                                                                                                                                                                                                                                                                                                                                                                                                                                                                                                                                                                                                                                                                                                                                                                                                                                                                                                                                                                                                                                                       |

1  
2  
3  
4  
5  
6  
7  
8  
9  
10  
11  
12  
13  
14  
15  
16  
17  
18  
19  
20  
21  
22  
23  
24  
25  
26  
27  
28  
29  
30  
31  
32  
33  
34  
35  
36  
37  
38  
39  
40  
41  
42  
43  
44  
45  
46  
47  
48  
49  
50  
51  
52  
53  
54  
55  
56  
57  
58  
59  
60



SCHOLARONE™  
Manuscripts



I, the Submitting Author has the right to grant and does grant on behalf of all authors of the Work (as defined in the below author licence), an exclusive licence and/or a non-exclusive licence for contributions from authors who are: i) UK Crown employees; ii) where BMJ has agreed a CC-BY licence shall apply, and/or iii) in accordance with the terms applicable for US Federal Government officers or employees acting as part of their official duties; on a worldwide, perpetual, irrevocable, royalty-free basis to BMJ Publishing Group Ltd ("BMJ") its licensees and where the relevant Journal is co-owned by BMJ to the co-owners of the Journal, to publish the Work in this journal and any other BMJ products and to exploit all rights, as set out in our [licence](#).

The Submitting Author accepts and understands that any supply made under these terms is made by BMJ to the Submitting Author unless you are acting as an employee on behalf of your employer or a postgraduate student of an affiliated institution which is paying any applicable article publishing charge ("APC") for Open Access articles. Where the Submitting Author wishes to make the Work available on an Open Access basis (and intends to pay the relevant APC), the terms of reuse of such Open Access shall be governed by a Creative Commons licence – details of these licences and which [Creative Commons](#) licence will apply to this Work are set out in our licence referred to above.

Other than as permitted in any relevant BMJ Author's Self Archiving Policies, I confirm this Work has not been accepted for publication elsewhere, is not being considered for publication elsewhere and does not duplicate material already published. I confirm all authors consent to publication of this Work and authorise the granting of this licence.

1  
2  
3  
4 1 **CLINICAL STUDY PROTOCOL**5  
6 27  
8  
9 3 **Randomized Phase II Trial of CAPTEM or FOLFIRI as**  
10  
11 4 **SEcond-line Therapy in NEuroendocrine CARcinomas and**  
12  
13 5 **Exploratory Analysis of Predictive Role of PET/CT Imaging**  
14  
15 6 **and Biological Markers (SENECA Trial): A Study Protocol**16  
17 7 **Running title: Second-line CAPTEM/FOLFIRI in NECs**18  
19 820  
21  
22 9 *Alberto Bongiovanni<sup>1\*</sup>, Chiara Liverani<sup>1</sup>, Sara Pusceddu<sup>2</sup>, Silvana Leo<sup>3</sup>, Giovanni Di*  
23  
24 10 *Meglio<sup>4</sup>, Stefano Tamberi<sup>5</sup>, Daniele Santini<sup>6</sup>, Fabio Gelsomino<sup>7</sup>, Francesca Pucci<sup>8</sup>,*  
25  
26 11 *Rossana Berardi<sup>9</sup>, Ivan Lolli<sup>10</sup>, Francesca Bergamo<sup>11</sup>, Sergio Ricci<sup>12</sup>, Flavia Foca<sup>13</sup>*  
27  
28 12 *Stefano Severi<sup>14</sup>, Toni Ibrahim<sup>1</sup>, and the SENECA Study Team Investigators\**29  
30  
31 13  
32  
33 14 *<sup>1</sup>Osteoncology and Rare Tumors Center, Istituto Scientifico Romagnolo per lo Studio e*  
34  
35 15 *la Cura dei Tumori (IRST) IRCCS, Meldola, Italy, <sup>2</sup>Department of Medical Oncology,*  
36  
37 16 *Istituto Nazionale Tumori Milano IRCCS, Milan, Italy, <sup>3</sup>Oncology Unit, Vito Fazzi*  
38  
39 17 *Hospital, Lecce, Italy, <sup>4</sup>Onocology Unit, Ospedale di Bolzano, Bolzano, Italy, <sup>5</sup>Medical*  
40  
41 18 *Oncology, Ospedale degli Infermi, Faenza, Italy, <sup>6</sup>Department of Medical Oncology,*  
42  
43 19 *Università Campus Bio-Medico, Rome, Italy, <sup>7</sup>Department of Oncology and*  
44  
45 20 *Hematology, Azienda Ospedaliera-Universitaria di Modena, Modena, Italy, <sup>8</sup>Medical*  
46  
47 21 *Oncology Unit, Azienda Ospedaliera-Universitaria di Parma, Parma, Italy, <sup>9</sup>Oncology*  
48  
49 22 *Clinic, AOU-Ospedali Riuniti Umberto I - G.M. Lancisi - G. Salesi, Ancona, Italy,*  
50  
51 23 *<sup>10</sup>Department of Oncology, IRCCS "Saverio De Bellis", Castellana Grotte, Italy,*  
52  
53 24 *<sup>11</sup>Department of Clinical and Experimental Oncology, Istituto Oncologico Veneto*  
54  
55 25 *(IOV), Padua, Italy, <sup>12</sup>Internal Medicine and Medical Oncology, Ospedale S. Chiara -*

1  
2  
3  
4 26 *AOU Pisana, Pisa, Italy, <sup>13</sup>Unit of Biostatistics and Clinical Trials, Istituto Scientifico*  
5  
6  
7 27 *Romagnolo per lo Studio e la Cura dei Tumori (IRST) IRCCS, Meldola, Italy, <sup>14</sup>Nuclear*  
8  
9 28 *Medicine Unit, Istituto Scientifico Romagnolo per lo Studio e la Cura dei Tumori*  
10  
11 29 *(IRST) IRCCS, Meldola, Italy*  
12  
13  
14 30

15  
16 31 **\*Correspondence:** Alberto Bongiovanni, MD  
17  
18 32 Osteoncology and Rare Tumors Center, Istituto Scientifico Romagnolo per lo Studio e  
19  
20 33 la Cura dei Tumori (IRST) IRCCS, Via Piero Maroncelli 40, 47014 Meldola (FC), Italy  
21  
22 34 Tel.: +39-0543-739100; Fax: +39-0543-739123  
23  
24 35 E-mail: [alberto.bongiovanni@irst.emr.it](mailto:alberto.bongiovanni@irst.emr.it)  
26  
27 36

28  
29 37 **Language style:** This article is formatted in British English.  
30  
31  
32 38  
33  
34 39  
35  
36 40  
37  
38 41  
39  
40 42  
41  
42 43  
43  
44 44  
45  
46 45  
47  
48 46  
49  
50 47  
51  
52  
53  
54  
55  
56  
57  
58  
59  
60



1  
2  
3  
4 73 **Ethics and dissemination:** The SENECA trial, supported by IRST, was authorised by  
5  
6 74 the local Ethics Committee and the Italian Medicines Agency (AIFA). Results will be  
7  
8  
9 75 widely disseminated via peer-reviewed manuscripts, conference presentations and  
10  
11 76 reports to relevant authorities.  
12

13  
14 77  
15 78 The study is currently open in Italy. ClinicalTrials.gov Identifier: NCT03387592.

16 79 EudraCT number: 2016-000767-17

17  
18 80 Protocol version: Clinical Study Protocol Version 1, 07.11.2016.  
19

20  
21  
22 81

23  
24 82 **Keywords:** neuroendocrine carcinoma, second-line, FOLFIRI, capecitabine,  
25  
26 83 temozolomide, CAPTEM  
27  
28

#### 29 84 **Strengths and limitations of the study**

- 30  
31 85
- 32 • the SENECA trial randomises patients to receive two different treatments,  
33 FOLFIRI or CAPTEM, providing important information on the activity of both  
34 86 combinations in different NEC subtypes (NET grade (G) 3 and NEC G3).  
35  
36 87
  - 37 • The SENECA trial analyses the role of miRNAs and other biological markers as  
38 88 prognostic and predictive factors. A further aim is to assess <sup>68</sup>Ga-PET/CT as a  
39  
40 89 tool to improve current histological classification.  
41  
42 90

43  
44 91 The major limitations of the study are:

- 45  
46 92 • The rarity of the disease and patient prognosis. However, the involvement of  
47  
48 93 several Italian centres will hopefully help to overcome this problem.
- 49  
50 94 • Poor prognosis of NEC patients. Patients progressing on platinum chemotherapy  
51  
52 95 usually have rapid deterioration of clinical conditions  
53  
54  
55  
56  
57  
58  
59  
60

97

**98 Introduction**

99 Poorly differentiated neuroendocrine carcinomas (NECs) are very rare malignancies,  
100 representing only 5%-10% of neuroendocrine neoplasias (NENs) (1-3). At the time of  
101 diagnosis, patients are generally in poor conditions due to aggressive and diffuse  
102 disease. These tumors are characterised by aggressive histological features (high Ki-67  
103 index, extensive necrosis, and nuclear atypia) and are classified as grade (G) 3 NECs  
104 according to the 2010 World Health Organization (WHO) classification (4). The 2017  
105 WHO classification recognized a further group called G3 NETs as having intermediate  
106 features between NETs and NECs (5).

107 An etoposide-platinum combination is the gold standard for the treatment of G3  
108 NECs, several studies published in the 1990s reporting substantial anti-tumor activity  
109 and high response rates (41%-67%) (6). However, prognosis is generally poor with a  
110 median progression-free survival (PFS) of 9 months and a median overall survival (OS)  
111 of 15-19 months. When progression occurs after first-line chemotherapy, the disease is  
112 usually very aggressive and patients succumb rapidly (7).

113 Given the rarity of this disease, prospective clinical data are lacking and treatment  
114 recommendations are essentially expert-based opinions. Two phase II studies  
115 investigating the second-line treatment of GEP-NECs are currently registered at  
116 *ClinicalTrials.gov*, one evaluating the safety and tolerability of everolimus in  
117 40 patients with G3 NEC/NET or G1/G2 NET switching to G3 NEN (National Clinical  
118 Trial identifier NCT02113800) and the other investigating the efficacy of avelumab  
119 (NCT03147404). A French study focusing on the identification of predictive molecular  
120 markers of response to sunitinib in poorly differentiated digestive NETs



1  
2  
3  
4 121 (NCT01215578) has now closed recruitment and results are eagerly awaited. Another  
5  
6 122 French multicentre prospective phase II trial is currently ongoing to investigate the  
7  
8 123 efficacy of the bevacizumab-FOLFIRI combination after progression on a  
9  
10 124 platinum/etoposide combination (7).

11  
12  
13 125 Different second-line chemotherapy combinations have been evaluated but shown  
14  
15 126 poor results (8-10). In a monocentre retrospective clinical trial, Hentic et al.  
16  
17 127 hypothesised the potential efficacy of FOLFIRI as second-line chemotherapy in  
18  
19 128 19 patients with G3 extra-pulmonary NECs (11). An objective response rate was  
20  
21 129 obtained in 31% of patients, with a disease control rate (DCR) of 62%. Median PFS  
22  
23 130 and OS were 4 and 18 months, respectively.

24  
25  
26  
27 131 In another retrospective study, a 71% DCR was obtained with temozolomide-based  
28  
29 132 chemotherapy in 25 patients with metastatic poorly differentiated endocrine carcinoma  
30  
31 133 of different sites and atypical bronchial carcinoid with Ki-67 > 20%. Small cell lung  
32  
33 134 carcinoma and large cell lung carcinoma were excluded. A PFS of 12 months (95%  
34  
35 135 confidence interval [CI], 5.5- 24) and OS of 22 months (95% CI, 12-31) were reported  
36  
37 136 in patients who responded to treatment or showed stable disease (SD), whereas OS was  
38  
39 137 only 8 months (95% CI, 0-8) in non-responders. The authors observed a higher response  
40  
41 138 rate in patients with Ki-67 ≤ 60%. There were also more responders in the group with  
42  
43 139 high uptake in somatostatin receptor scintigraphy (SRS) and in those with positive  
44  
45 140 staining for chromogranin A. Both factors are often associated with more highly  
46  
47 141 differentiated tumours (12).

48  
49  
50 142 Literature data on lung NECs in progression after first-line chemotherapy are based  
51  
52 143 on small patient series (13). Moreover, there is increasing evidence of some  
53  
54 144 discrepancies in the current grading of NECs, highlighting the need for more accurate  
55  
56  
57  
58  
59  
60

1  
2  
3  
4 145 biomarkers (4, 5). Recent research has shown that NECs may, in fact, comprise two  
5  
6 146 distinct subgroups with different pathogenesis, *i.e.* a highly proliferative group derived  
7  
8 147 from well differentiated neuroendocrine tumours (NETs) and characterised by  
9  
10 148 mutations in MEN1, DAXX and ATRX, and a poorly differentiated group derived from  
11  
12 149 neuroendocrine-differentiated adenocarcinomas and characterised by a mutation in  
13  
14 150 RB1. Both subgroups display a distinct prognosis and different sensitivity to  
15  
16 151 chemotherapy (14-16). Micro(mi)RNAs are a class of small, non-coding, highly  
17  
18 152 conserved single-stranded RNAs involved in the post-transcriptional regulation of cell  
19  
20 153 proliferation, differentiation, survival, and apoptosis (17). They are often associated  
21  
22 154 with resistance to therapy (18, 19). Whilst miRNAs are known to show a specific  
23  
24 155 expression pattern in NETs (20), little is known about differential miRNA profiles in  
25  
26 156 NEC patients. At present, no data are available on the deregulation of specific miRNAs  
27  
28 157 in this setting.

29  
30  
31  
32  
33  
34 158 In a study recently published by our group on GEP-NEC patients undergoing  
35  
36 159 first-line platinum-based chemotherapy, median PFS was 19.3 months and 6.3 months  
37  
38 160 ( $p < 0.01$ ) in patients with Ki-67 value between 20% and 50% or  $>50\%$ , respectively  
39  
40 161 (19). Median (m)OS was 8.1 months in the latter group but was not reached in the  
41  
42 162 former group ( $p = 0.039$ ). Patients with a positive  $^{68}\text{Ga}$ -PET/CT had a higher 18-month  
43  
44 163 OS rate than those with a negative scan (75% vs. 34.3%, respectively), but the  
45  
46 164 difference was not statistically significant ( $p = 0.06$ ). Our data highlighted that  $^{68}\text{Ga}$ -  
47  
48 165 PET/CT positivity may be a discriminating factor (16, 21) in predicting prognosis,  
49  
50 166 especially in the metastatic setting where histological material is not always available  
51  
52 167 for evaluation. Furthermore,  $^{18}\text{F}$ fluorodeoxyglucose ( $^{18}\text{F}$ FDG)-PET/CT may be useful to  
53  
54 168 discriminate between patients with different prognosis (22).  
55  
56  
57  
58  
59  
60

1  
2  
3  
4 169 Given the above premises, we decided to investigate the efficacy and safety of  
5  
6 170 second-line FOLFIRI or CAPTEM in patients with GEP and lung NECs in progression  
7  
8  
9 171 after first-line platinum-based treatment. We also aimed to study the serum miRNA  
10  
11 172 profile in relation to the primary mutational status of MEN1, DAXX, ATRX and RB-1,  
12  
13 173 patient prognosis and response to therapy, and to assess the prognostic and predictive  
14  
15 174 role of <sup>18</sup>FDG-PET/CT, <sup>68</sup>Ga-PET/CT and Ki-67 score.  
16  
17  
18 175  
19  
20  
21 176

## 23 177 **Methods and Analysis**

### 26 178 Study design

28  
29 179 The SENECA study is a multicentre randomised non-comparative phase II study  
30  
31 180 (Figure 1). Patients with metastatic neuroendocrine carcinomas of different origin  
32  
33 181 (lung or gastroenteropancreatic) in progression after first-line treatment are randomized  
34  
35 182 to receive FOLFIRI every 14 days for a maximum of 12 cycles or until progression or  
36  
37 183 unacceptable toxicity, or CAPTEM every 28 days for a maximum of 6 cycles or until  
38  
39 184 progression or unacceptable toxicity.  
40  
41

42 185 The treatment arms are as follows:  
43  
44  
45 186

### 47 187 FOLFIRI regimen

- 50 188 • Irinotecan 180 mg/m<sup>2</sup>, given as a 60-min. intravenous (i.v.) infusion on day 1 every  
51  
52 189 2 weeks followed by
- 54 190 • Leucovorin 200 mg/m<sup>2</sup>, given as a 2-h i.v. infusion on day 1 every 2 weeks followed  
55  
56  
57 191 by

- 1  
2  
3  
4 192 • 5-fluorouracil (5-FU) 400 mg/m<sup>2</sup> given as bolus, and then 5-FU 2400 mg/m<sup>2</sup> given  
5  
6 193 as a 48-h continuous infusion on day 1, every 2 weeks, until progression or for a  
7  
8 194 maximum of 12 cycles.

9  
10  
11 195

### 12 13 196 CAPTEM regimen

14  
15  
16 197 Capecitabine 750 mg/m<sup>2</sup> twice a day on days 1-14 in combination with temozolomide  
17  
18 198 200 mg/m<sup>2</sup> daily on days 10-14, every 4 weeks, until progression or for a maximum of  
19  
20  
21 199 6 cycles.

22  
23 200 The study includes patients aged  $\geq 18$  years with a histological diagnosis of G3  
24  
25 201 neuroendocrine carcinoma (GEP-NEC and lung NEC) according to the 2010 and 2015  
26  
27 202 GEP and Lung NEN WHO classifications, respectively, Ki-67  $>20\%$  and measurable  
28  
29 203 disease according to Response Evaluation Criteria In Solid Tumors (RECIST) 1.1 criteria.  
30  
31 204 All patients must have an Eastern Cooperative Oncology Group (ECOG) performance  
32  
33 205 status  $\leq 2$  with a life expectancy  $> 3$  months and must have already undergone first-line  
34  
35 206 treatment for metastatic disease with platinum -based chemotherapy  
36  
37 207 (cisplatin/carboplatin and etoposide, FOLFOX4 or CAPOX). Adequate haematological,  
38  
39 208 liver and renal function is required and effective contraceptive methods must be used by  
40  
41 209 female patients of childbearing age. Written informed consent is obtained from all  
42  
43 210 patients to take part in the study. Exclusion criteria are as follows: metastatic NECs  
44  
45 211 previously treated with an irinotecan or temozolomide regimen, known hypersensitivity  
46  
47 212 to 5-FU/capecitabine, calcium levofolinate, irinotecan or their recipients. All acute  
48  
49 213 toxic effects of any prior therapy (including surgery, radiation therapy and  
50  
51 214 chemotherapy) must have resolved to grade  $\leq 1$  according to National Cancer Institute  
52  
53  
54  
55  
56  
57 215 Common Terminology Criteria for Adverse Events version 4.03 (CTCAE). Patients  
58  
59  
60

1  
2  
3  
4 216 taking part in another clinical trial with any investigational agent < 30 days prior to  
5  
6 217 study screening or with a history of allergic reactions attributable to compounds of  
7  
8 218 similar chemical or biological composition are excluded. Patients who have undergone  
9  
10 219 chemotherapy or radiotherapy < 4 weeks (6 weeks for nitrosoureas or mitomycin C)  
11  
12 220 prior to entering the study, have not recovered from adverse events caused by agents  
13  
14 221 administered > 4 weeks earlier, or have known brain metastases are not eligible for the  
15  
16 222 study. Patients with other malignancies with a disease-free interval of < 5 years (with  
17  
18 223 the exception of non melanoma skin cancer or low-grade superficial bladder cancer) are  
19  
20 224 excluded, as are those with any severe and/or uncontrolled medical condition or other  
21  
22 225 condition that could affect their participation in the study such as:

- 23 226 • unstable angina pectoris, symptomatic congestive heart failure, myocardial infarction  
24  
25 227 < 6 months before the start of the study, serious uncontrolled cardiac arrhythmia or  
26  
27 228 any other clinically significant cardiac disease;
- 28 229 • severely impaired lung function (spirometry and DLCO 50% of the normal predicted  
29  
30 230 value and/or oxygen saturation  $\leq$  88% at rest, in room air);
- 31 231 • uncontrolled diabetes as defined by fasting serum glucose  $>1.5$  x upper limit of  
32  
33 232 normal;
- 34 233 • any active (acute or chronic) or uncontrolled infections/disorders.

35 234 Tumour evaluation by anatomic imaging (multiphase CT and/or MRI) includes chest,  
36  
37 235 abdomen, pelvis, and any additional known sites of disease. These tests are performed  
38  
39 236 at baseline, every three months during treatment as per national regulatory agency  
40  
41 237 indications, and after the end of treatment in non-progressing patients until progression.  
42  
43 238 It is recommended that  $^{68}\text{Ga}$ -PET/CT and  $^{18}\text{F}$ FDG-PET/CT scans be performed at  
44  
45 239 baseline or a maximum of 90 days before study enrollment. An EORTC quality of life  
46  
47  
48  
49  
50  
51  
52  
53  
54  
55  
56  
57  
58  
59  
60

1  
2  
3  
4 240 questionnaire is administered at baseline and every three months thereafter during the  
5  
6 241 treatment period.  
7  
8

9 242

## 10 243 Study endpoints

11  
12  
13  
14 244 The primary endpoint of the study is the DCR of each treatment, defined as the  
15  
16 245 percentage of patients who have achieved complete or partial response or stable disease  
17  
18 246 for  $\geq 12$  weeks from the start of therapy. DCR will be evaluated using the new  
19  
20 247 international criteria proposed by the RECIST version 1.1. Acute and late toxicity will  
21  
22 248 be assessed by CTCAE Version 4.03, the latter defined as toxicity occurring at least  
23  
24 249 30 days after the end of the last treatment cycle. Secondary endpoints are OS, calculated  
25  
26 250 from the start of treatment to death from any cause, and PFS, calculated from the start of  
27  
28 251 treatment to the date of the first documented evidence of disease progression or of death  
29  
30 252 from any cause. All the analyses will be performed in the intention-to-treat population.  
31  
32 253 Patients without events at the time of analysis will be censored at their last-known-alive  
33  
34 254 date for OS and at their last date of tumour evaluation for PFS. A further secondary  
35  
36 255 endpoint is the evaluation of quality of life using the European Organization for the  
37  
38 256 Research and Treatment of Cancer Quality of Life Questionnaire (EORTC QLQ-C30).  
39  
40 257 When data are available, the impact of baseline  $^{68}\text{Ga}$ -PET/CT and  $^{18}\text{F}$ FDG-PET/CT on  
41  
42 258 PFS will be analysed with exploratory intent. After signing the informed consent for  
43  
44 259 biomarker assessment, patients will undergo evaluation of the mutation status of MEN1,  
45  
46 260 DAXX, ATRX and RB-1 in primary tumour tissue and of miRNA in blood samples.  
47  
48 261 Assessment of the miRNA profile will be performed on the first 20 patients who agree  
49  
50 262 to participate in the biological part of the study.  
51  
52  
53  
54  
55  
56  
57  
58  
59  
60

## 264 Ethical considerations

265 The present clinical trial, supported by IRST, was authorised by the local Ethics  
266 Committee and by the Italian Medicines Agency (AIFA). The request for EudraCT  
267 registration (mandatory for studies in Europe) was send to AIFA in December 2016  
268 and we received a EudraCT number (EudraCT 2016-000767-17). However, technical  
269 problems at AIFA resulted in some clinical trials, including ours, being uploaded onto  
270 the EudraCT website after enrolment of the first patients.

271 The study is also registered on the *ClinicalTrials.gov* website (NCT03387592). The  
272 study complies with the ethical standards laid down in the 1964 Declaration of Helsinki  
273 and the principles of Good Clinical Practice guidelines (including written informed  
274 consent).

## 275 Patient and public involvement

276 This research work was performed without patient involvement in the study design,  
277 execution or outcome measures.

## 279 Statistical methods

280 The Bryant and Day design is used to estimate a sample size that takes into account  
281 both treatment activity and toxicity. Although randomisation is used to allocate patients  
282 to the two arms, no formal statistical comparisons between treatment regimens are  
283 planned. The purpose of randomisation is to reduce bias due to patient assignment to a  
284 specific treatment arm. The hypothesis for the control arm is based on literature data  
285 (23, 24).

286 An  $\alpha$  level of 0.10 (both for toxicity and DCR) and a power of 90% have been

1  
2  
3  
4 287 adopted. A DCR rate  $\geq 60\%$  and a relevant toxicity rate  $\leq 20\%$  are considered acceptable  
5  
6 288 rates, while a DCR rate  $\leq 40\%$  and a relevant toxicity rate  $\geq 40\%$  are considered  
7  
8 289 unacceptable rates. Given these hypotheses, the first step of the study will require  
9  
10 290 25 patients. If  $\geq 10$  patients with a DCR are observed and  $\geq 15$  patients do not have  
11  
12 291 significant toxicity, the study will enrol patients in the next step. A total of 53 patients  
13  
14 292 will be enrolled. If  $\geq 25$  patients with DCR and  $\geq 36$  patients without any relevant  
15  
16 293 toxicity are observed, treatment will be considered active and not toxic. This design is  
17  
18 294 used for each treatment scheme and all analyses will be performed separately. If one of  
19  
20 295 the schemes does not obtain the expected proportions of the first step, the arm will be  
21  
22 296 closed and patients will be enrolled in the other arm until the target is reached; if the  
23  
24 297 expected proportions are not reached in any arm, the study will be prematurely closed.  
25  
26 298 If no premature stop occurs, a total of 106 evaluable patients are needed (53 patients in  
27  
28 299 each arm). Taking into account a 5% dropout rate, 56 patients must be enrolled in each  
29  
30 300 arm (total 112 patients). G3-4 gastrointestinal toxicity, G4 thrombocytopenia,  
31  
32 301 prolonged G3-G4 neutropenia ( $> 7$  days) and drug-related hospitalisations are  
33  
34 302 considered relevant toxicity. The stratification factors of this study are Ki-67 (21%-55  
35  
36 303 % vs.  $> 55\%$ ) and site of primary tumour (lung vs. GEP). A subgroup analysis of the  
37  
38 304 efficacy of both treatments according to these stratification factors has been planned.  
39  
40 305 Complete response, partial response or stable disease for at least 12 weeks will be  
41  
42 306 considered as the DCR. The proportion of patients in this category will be determined  
43  
44 307 and 95% CIs for the DCR will be calculated. OS and PFS will be estimated using the  
45  
46 308 Kaplan-Meier method (two-sided 95% CIs) (24). Appropriate statistical analyses will be  
47  
48 309 performed on the basis of the data available to compare QLQ-C30 scores between  
49  
50 310 baseline and subsequent follow-up visits.  
51  
52  
53  
54  
55  
56  
57  
58  
59  
60



1  
2  
3  
4 311 When data are available, the impact of <sup>68</sup>Ga-PET/CT result on PFS will be analysed  
5  
6 312 with exploratory intent. The Shapiro-Wilk test will be used to determine the normality  
7  
8 313 distribution of each clinical, demographic and biological biomarker (25). In the event  
9  
10 314 of a non-normal distribution, nonparametric statistics will be used to analyse the  
11  
12 315 relationship between the serum levels of each marker, considered as continuous  
13  
14 316 variables, and response to treatment. In the event of normal biomarker distribution,  
15  
16 317 a parametric test will be used. All endpoints will be analysed separately for each  
17  
18 318 treatment group.  
19  
20  
21  
22

## 23 **Discussion**

24  
25 320 There is still no truly effective second-line chemotherapy for neuroendocrine  
26  
27 321 carcinoma. Overall prognosis of patients is poor, with an OS of 5 months in the  
28  
29 322 metastatic setting according to SEER (Surveillance, Epidemiology, and End Results)  
30  
31 323 data (26). Only 5% of all patients are long-term survivors. There is also a marked lack  
32  
33 324 of prognostic and predictive factors (5).  
34  
35

36  
37 325 Three phase II studies registered at *ClinicalTrials.gov* are currently investigating  
38  
39 326 second-line treatment of GEP-NECs, the first focusing on FOLFIRI and bevacizumab  
40  
41 327 (NCT02820857), the second on everolimus (NCT02113800) and the third on avelumab  
42  
43 328 (NCT03147404). Some abstracts were presented at ESMO (European Society for  
44  
45 329 Medical Oncology) 2018 and ASCO ( American Society of Clinical Oncology ) 2019  
46  
47 330 on the use of immunotherapy in GEP-NECs, all showing inconclusive results. The  
48  
49 331 SENECA study uses a promising approach to the treatment of patients with metastatic  
50  
51 332 NECs. First, both the activity and safety of 2 regimens are assessed in the same setting  
52  
53 333 with a sizeable patient population (56 patients/arm). In addition, patients are stratified  
54  
55 334 according to Ki-67 index and morphology to investigate the role of each treatment  
56  
57  
58  
59  
60

1  
2  
3  
4 335 combination in both poorly differentiated and well differentiated NECs. Another aim of  
5  
6 336 this study is to integrate both biological and metabolic imaging data in an effort to  
7  
8  
9 337 improve the current GEP-NEC classification.

10  
11 338 The duration of treatments in the metastatic setting is a dilemma in NENs and  
12  
13 339 especially in neuroendocrine carcinomas. Given the lack of evidence-based  
14  
15 340 recommendations on treatment duration of second-line chemotherapy in NECs, we  
16  
17 341 decided to opt for a fixed duration of treatments to avoid unnecessary exposure to  
18  
19  
20 342 cytotoxic agents and consequent bone marrow reserve depletion (27).

21  
22  
23 343 In conclusion, there are still no FDA/EMA (Food and Drug Administration/European  
24  
25 344 Medicines Agency)-approved second-line therapeutic options for patients with  
26  
27 345 metastatic NECs, and the SENECA trial could represent a step forward in finding novel  
28  
29 346 therapies to prolong survival and maintain quality of life. Moreover, the integration of  
30  
31 347 biological and imaging data could -lead to a better understanding of the natural history  
32  
33  
34 348 of the disease and help to identify potential responders.

35  
36 349

37  
38  
39 350

#### 40 41 351 **Confidentiality**

42  
43 352 This study will be conducted in full conformity with ICH (The International Council for  
44  
45 353 Harmonisation of Technical Requirements for Pharmaceuticals for Human Use)  
46  
47 354 Guidelines for Good Clinical Practice, Directive 2001/20/EEC of the European  
48  
49  
50 355 Parliament and other relevant current local legislation. Participants will be allocated a  
51  
52 356 unique identification (ID) number at entry. The master list linking participant personal  
53  
54  
55 357 information and ID number will be maintained in a separate locked cabinet and  
56  
57  
58  
59  
60

1  
2  
3  
4 358 password-protected hard-drive. Data will be analysed by ID number only. Patient files  
5  
6 359 and other source data will for be kept a maximum of 15 years.  
7  
8

9 360

10  
11 361

## 12 13 362 **Ethics and Dissemination**

14  
15 363 The SENECA trial, supported by IRST, involves several Italian centres and was  
16  
17 364 authorised by the local Ethics Committees of the centres taking part and by the Italian  
18  
19 365 Medicines Agency (AIFA) (see list of all centers in the supplementary table 1). After  
20  
21 366 completing the study, all data, including beneficial and adverse events, of the trial will  
22  
23 367 be communicated at scientific meetings and published in indexed peer-reviewed  
24  
25 368 journals. If shown to be effective, the therapy program will be made available to the  
26  
27 369 general public in an appropriate manner.  
28  
29  
30  
31

32 370

33  
34 371

## 35 36 372 **Abbreviations**

37  
38 373 CAPTEM, capecitabine plus temozolomide; DCR, disease control rate; GEP,  
39  
40 374 gastroenteropancreatic; NEC, neuroendocrine carcinoma; NET, neuroendocrine tumour;  
41  
42 375 OS, overall survival; PFS, progression-free survival  
43  
44  
45

46 376

## 47 48 377 **Author contributions**

49  
50 378 AB, CL and TI designed the study and drafted the article. AB was responsible for data  
51  
52 379 acquisition. SP, SL, GDM, SS and ST provided methodological support and designed a  
53  
54 380 clinical information data extraction method for the protocol. FF performed the statistical  
55  
56 381 analysis. DS, FG, FP, RB, IL, FB and SR revised the paper for important intellectual  
57  
58  
59  
60

1  
2  
3  
4 382 content. All authors read and approved the present version of the manuscript for  
5  
6 383 submission.

7  
8  
9 384

10  
11 385

12  
13 386

14  
15  
16 387 **Data availability statement**

17  
18 388 The datasets used and analysed in the present study are available from the  
19  
20 389 corresponding author on reasonable request.

21  
22  
23 390

24  
25 391 **Funding**

26  
27 392 The study was conducted in the absence of any commercial or financial relationships  
28  
29 393 that could be construed as a potential conflict of interest.

30  
31  
32 394

33  
34 395 **Conflicts of interest**

35  
36 396 The authors declare no conflict of interest.

37  
38  
39 397

40  
41 398 **Acknowledgements**

42  
43 399 *SENECA study Team investigators*: Davide Campana, Davide Pastorelli, Nicola  
44  
45 400 Silvestris, Francesco Silvestris, Angela Buonadonna and Giuseppe Badalamenti.

46  
47 401 The authors thank Gráinne Tierney and Cristiano Verna for editorial assistance.

## 403 **References**

- 404 1. Kulke MH, Shah MH, Benson AB 3<sup>rd</sup>, Bergsland E, Berlin JD, Blaszkowsky LS, et  
405 al. Neuroendocrine tumors, version 1.2015. *J Natl Compr Canc Netw* (2015)  
406 13(1):78-108
- 407 2. Modlin IM, Moss SF, Chung DC, Jensen RT, Snyderwine E. Priorities for  
408 improving the management of gastroenteropancreatic neuroendocrine tumors. *J*  
409 *Natl Cancer Inst* (2008)100(18):1282-9. doi: 10.1093/jnci/djn275
- 410 3. Yao YC, Hassan M, Phan A, Dagohoy C, Leary C, Mares JE, et al. One hundred  
411 years after “carcinoid”: epidemiology of and prognostic factors for neuroendocrine  
412 tumors in 35,825 cases in the United States. *J Clin Oncol* (2008) 26(18):3063-72
- 413 4. Fraenkel M, Kim M, Faggiano A, de Herder WW, Valk GD; Knowledge NETwork.  
414 Incidence of gastroenteropancreatic neuroendocrine tumours: a systematic review  
415 of the literature. *Endocr Relat Cancer* (2014) 21(3):R153-63. doi: 10.1530/ERC-  
416 13-0125
- 417 5. Lloyd RV, Osamura RY, Klöppel G, Rosai J. WHO classification of tumours of  
418 endocrine organs. 4th ed (2017). Lyon: International Agency for Research on  
419 Cancer (IARC)
- 420 6. Sorbye H, Welin S, Langer SW, Vestermark LW, Holt N, Osterlund P, et al.  
421 Predictive and prognostic factors for treatment and survival in 305 patients with  
422 advanced gastrointestinal neuroendocrine carcinoma (WHO G3): the NORDIC  
423 NEC study. *Ann Oncol* (2013) 24(1):152-60.
- 424 7. Heetfeld M, Chougnet CN, Olsen IH, Rinke A, Borbath I, Crespo G, et al.  
425 Characteristics and treatment of patients with G3 gastroenteropancreatic  
426 neuroendocrine neoplasms. *Endocr Relat Cancer* (2015) 22(4):657-64. doi:

- 1  
2  
3  
4 427 10.1530/ERC-15-0119  
5  
6 428 8. Walter T, Malka D, Hentic O, Lombard-Bohas C, Le Malicot K, Smith D, et al.  
7  
8  
9 429 Evaluating bevacizumab in combination with FOLFIRI after the failure of  
10  
11 430 platinum-etoposide regimen in patients with advanced poorly  
12  
13 431 differentiated neuroendocrine carcinoma: The PRODIGE 41-BEVANEC  
14  
15 432 randomized phase II study. *Dig Liver Dis* (2018) 50(2):195-8. doi:  
16  
17 433 10.1016/j.dld.2017.11.020  
18  
19  
20 434 9. Hadoux J, Malka D, Planchard D, Scoazec JY, Caramella C, Guigay J, et al. Post-  
21  
22 435 first-line FOLFOX chemotherapy for grade 3 neuroendocrine carcinoma. *Endocr*  
23  
24 436 *Relat Cancer* (2015) 22(3):289-98. doi: 10.1530/ERC-15-0075  
25  
26  
27 437 10. Olsen IH, Sørensen JB, Federspiel B, Kjaer A, Hansen CP, Knigge U, et al.  
28  
29 438 Temozolomide as second or third line treatment of patients with neuroendocrine  
30  
31 439 carcinomas. *Sci World J* (2012) 2012:2012:170496. doi: 10.1100/2012/170496  
32  
33  
34 440 11. Hentic O, Hammel P, Couvelard A, Rebours V, Zappa M, Palazzo M, et al.  
35  
36 441 FOLFIRI regimen: an effective second-line chemotherapy after failure of  
37  
38 442 etoposide-platinum combination in patients with neuroendocrine carcinomas grade  
39  
40 443 3. *Endocr Relat Cancer* (2012) 9(6):751-7. doi: 10.1530/ERC-12-0002  
41  
42  
43 444 12. Welin S, Sorbye H, Sebjornsen S, Knappskog S, Busch C, Oberg K. Clinical effect  
44  
45 445 of temozolomide-based chemotherapy in poorly differentiated endocrine carcinoma  
46  
47 446 after progression on first-line chemotherapy. *Cancer* (2011) 117(20):4617-22. doi:  
48  
49 447 10.1002/cncr.26124  
50  
51  
52 448 13. Noda K, Nishiwaki Y, Kawahara M, Negoro S, Sugiura T, Yokoyama A, et al.  
53  
54 449 Irinotecan plus cisplatin compared with etoposide plus cisplatin for extensive small-  
55  
56 450 cell lung cancer. *N Engl J Med* (2002) 346(2):85-91. doi: 10.1056/NEJMoa003034  
57  
58  
59  
60

- 1  
2  
3  
4 451 14. Derks JL, Leblay N, Thunnissen E, van Suylen RJ, den Bakker M, Groen HJM, et  
5  
6 452 al. Molecular subtypes of pulmonary large-cell neuroendocrine carcinoma predict  
7  
8 453 chemotherapy treatment outcome. *Clin Cancer Res* (2018) 24(1):33-42. doi:  
9  
10 454 10.1158/1078-0432.CCR-17-1921  
11  
12  
13 455 15. Tang LH, Untch BR, Reidy DL, O'Reilly E, Dhall D, Jih L, et al. Well-  
14  
15 456 differentiated neuroendocrine tumors with a morphologically apparent high-grade  
16  
17 457 component: a pathway distinct from poorly differentiated neuroendocrine  
18  
19 458 carcinomas. *Clin Cancer Res* (2016) 22(4):1011-7. doi: 10.1158/1078-0432.CCR-  
20  
21 459 15-0548  
22  
23  
24 460 16. Liverani C, Bongiovanni A, Mercatali L, Foca F, Pieri F, De Vita A, Spadazzi C,  
25  
26 461 Miserocchi G, Recine F, Riva N, Nicolini S, Severi S, Martinelli G, Ibrahim T.  
27  
28 462 Grading of Neuroendocrine Carcinomas: Correlation of 68Ga-PET/CT Scan with  
29  
30 463 Tissue Biomarkers. *Dis Markers*. 2018 Dec 2;2018:6878409.  
31  
32  
33 464 17. Grolmusz VK, Kövesdi A, Borcs K, Igaz P, Patócs A. Prognostic relevance of  
34  
35 465 proliferation-related miRNAs in pancreatic neuroendocrine neoplasms *Eur J*  
36  
37 466 *Endocrinol* (2018) 179(4):219-28. doi: 10.1530/EJE-18-0305  
38  
39  
40 467 18. Gill P, Kim E, Chua TC, Clifton-Bligh RJ, Nahm CB, Mittal A, et al. MiRNA-3653  
41  
42 468 is a potential tissue biomarker for increased metastatic risk in pancreatic  
43  
44 469 neuroendocrine tumours. *Endocr Pathol* (2019). doi: 10.1007/s12022-019-9570-y  
45  
46 470 [Epub ahead of print]  
47  
48  
49 471 19. Panarelli N, Tyryshkin K, Wong JJM, Majewski A, Yang X, Scognamiglio T, et al.  
50  
51 472 Evaluating gastroenteropancreatic neuroendocrine tumors through microRNA  
52  
53 473 sequencing. *Endocr Relat Cancer* (2019) 26(1):47-57. doi: 10.1530/ERC-18-0244  
54  
55  
56 474 20. Malczewska A, Kidd M, Matar S, Kos-Kudla B, Modlin IM. A comprehensive  
57  
58  
59  
60

- 1  
2  
3  
4 475 assessment of the role of mirnas as biomarkers in gastroenteropancreatic  
5  
6 476 neuroendocrine tumors. *Neuroendocrinology* (2018)107(1):73-90. doi:  
7  
8 477 10.1159/000487326  
9  
10  
11 478 21. Bongiovanni A, Riva N, Ricci M, Liverani C, La Manna F, De Vita A, et al. First-  
12  
13 479 line chemotherapy in patients with metastatic gastroenteropancreatic  
14  
15 480 neuroendocrinecarcinoma. *Onco Targets Ther* (2015) 8:3613-9. doi:  
16  
17 481 10.2147/OTT.S91971  
18  
19  
20 482 22. Sansovini M, Severi S, Ianniello A, Nicolini S, Fantini L, Mezzenga E, Ferroni F,  
21  
22 483 Scarpi E, Monti M, Bongiovanni A, Cingarlini S, Grana CM, Bodei L, Paganelli G.  
23  
24 484 Long-term follow-up and role of  
25  
26 485 FDG PET in advanced pancreatic neuroendocrine patients treated with 177Lu-D  
27  
28 486 OTATATE. *Eur J Nucl Med Mol Imaging*. 2017 Mar;44(3):490-499.  
29  
30  
31 487 23. Sorbye H, Welin S, Langer SW, Vestermark LW, Holt N, Osterlund P, et al.  
32  
33 488 Predictive and prognostic factors for treatment and survival in 305 patients with  
34  
35 489 advanced Gastrointestinal neuroendocrine carcinoma (WHO G3):  
36  
37 490 the NORDIC NEC study. *Ann Oncol* (2013) 24(1):152-60. doi:  
38  
39 491 10.1093/annonc/mds276  
40  
41  
42 492 24. Perren A, Couvelard A, Scoazec JY, Costa F, Borbath I, Delle Fave G, et al.  
43  
44 493 ENETS consensus guidelines for the standards of care in neuroendocrine tumors:  
45  
46 494 pathology: diagnosis and prognostic stratification. *Neuroendocrinology* (2017)  
47  
48 495 105(3):196-200. doi: 10.1159/000457956  
49  
50  
51 496 25. Sorbye H, Köhne CH, Sargent DJ, Glimelius B. Patient characteristics and  
52  
53 497 stratification in medical treatment studies for metastatic colorectal cancer: a  
54  
55 498 proposal for standardization of patient characteristic reporting and stratification.  
56  
57  
58  
59  
60



1  
2  
3  
4 499 *Ann Oncol* (2007) 18(10):1666-72.  
5

6 500 26. Kaplan EL, Meier P. Nonparametric estimation from incomplete observations.  
7  
8  
9 501 *J. Amer. Statist Assoc* (1958) 53:457-81.  
10

11 502 27. Strosberg JR, Fine RL, Choi J, Nasir A, Coppola D, Chen DT, et al. First-line  
12  
13 503 chemotherapy with capecitabine and temozolomide in patients with metastatic  
14  
15 504 pancreatic endocrine carcinomas. *Cancer* (2011) 117 (2):268-75.  
16  
17

18 505  
19

20 506  
21

22 507  
23

24  
25 508 **Figure legend**

26  
27 509 **FIGURE 1** | SENECA study design.  
28

29 510  
30  
31  
32  
33  
34  
35  
36  
37  
38  
39  
40  
41  
42  
43  
44  
45  
46  
47  
48  
49  
50  
51  
52  
53  
54  
55  
56  
57  
58  
59  
60

1  
2  
3  
4  
5  
6  
7  
8  
9  
10  
11  
12  
13  
14  
15  
16  
17  
18  
19  
20  
21  
22  
23  
24  
25  
26  
27  
28  
29  
30  
31  
32  
33  
34  
35  
36  
37  
38  
39  
40  
41  
42  
43  
44  
45  
46  
47  
48  
49  
50  
51  
52  
53  
54  
55  
56  
57  
58  
59  
60

Fig. 1

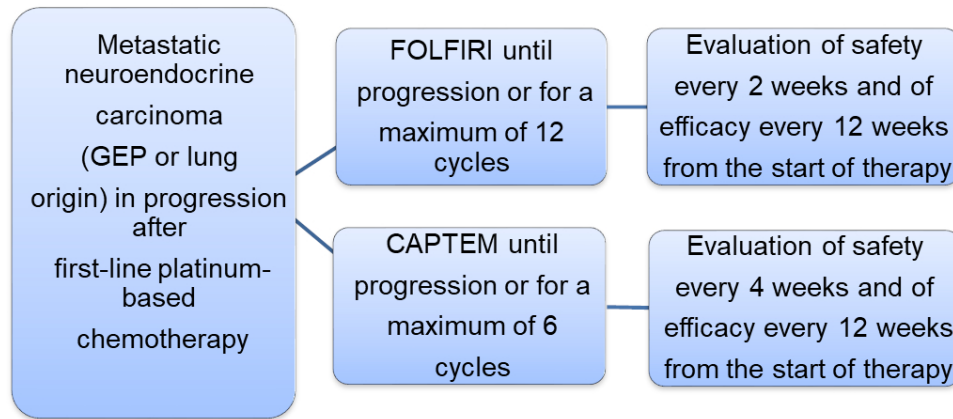

FIGURE 1 | SENECA study design.

90x91mm (300 x 300 DPI)

**Supplementary Table 1.** List of Ethical committee of Italian Centers with the ID approval number involved in SENECA trial

| <b>Center Ethical Committee</b>                                                         | <b>Approval ID number</b> |
|-----------------------------------------------------------------------------------------|---------------------------|
| Comitato Etico della Romagna CEROM                                                      | 1660                      |
| Comitato Etico di INT - Milano                                                          | 146/16                    |
| Comitato etico per la sperimentazione clinica - Comprensorio di Bolzano                 | 8-2017                    |
| Comitato Etico dell' Area Vasta Emilia Nord                                             | 220/16                    |
| Comitato Etico Area Vasta Nord Ovest- Pisa                                              | 1220/2016                 |
| Comitato Etico IRCCS "De Bellis" - Castellana Grotte                                    | 34/CE De Bellis           |
| Comitato Etico dell' Area Vasta Emilia Nord                                             | 24-2017                   |
| Istituto Oncologico Veneto - Padova                                                     | 2016/63                   |
| Comitato Etico ASL - Lecce                                                              | 140686                    |
| Comitato Etico di Area Vasta Emilia Centro (CE-AVEC)                                    | 32/2017/O/Sper            |
| Comitato Etico Regionale Marche di AOU - Ospedali Riuniti di Ancona                     | 2017 0068 OR              |
| Comitato Etico dell'Università Campus Bio-Medico di Roma                                | 02.17                     |
| Comitato Etico per la Pratica Clinica dell'ULSS 1 Dolomiti,                             | 399/CE Dolomiti           |
| Comitato Etico Istituto Tumori - Bari                                                   | 621/CE                    |
| Comitato Etico Interregionale - Bari                                                    | 5165                      |
| Comitato Etico Palermo 1                                                                | 02/2018                   |
| Comitato Etico Unico Regionale (C.E.U.R.)                                               | Ceur-2018-Sper-076-CRO    |
| Comitato etico per la Sperimentazione Clinica (CESC) delle Province di Verona e Rovigo  | 2350CESC                  |
| Comitato Etico degli IRCCS Istituto Europeo di Oncologia e Centro Cardiologico Monzino. | IEO 1133 - RE2189/NC      |
| Comitato Etico Interaziendale A.O.U. San Luigi Gonzaga                                  | 192/2019                  |
| Comitato Etico di Brescia                                                               | 3729                      |
| Comitato Etico Area Vasta Centro - AOU Careggi                                          | 12447_spe                 |

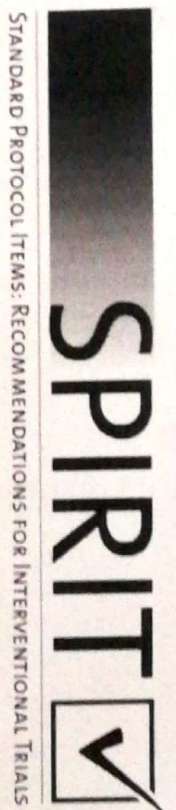

SPIRIT 2013 Checklist: Recommended items to address in a clinical trial protocol and related documents\*

| Section/Item | Item No | Description | Addressed on page number |
|--------------|---------|-------------|--------------------------|
|--------------|---------|-------------|--------------------------|

Administrative information

|                            |    |                                                                                                                                                                                                                                                                                          |                     |
|----------------------------|----|------------------------------------------------------------------------------------------------------------------------------------------------------------------------------------------------------------------------------------------------------------------------------------------|---------------------|
| Title                      | 1  | Descriptive title identifying the study design, population, interventions, and, if applicable, trial acronym                                                                                                                                                                             | <u>4</u>            |
| Trial registration         | 2a | Trial identifier and registry name. If not yet registered, name of intended registry                                                                                                                                                                                                     | <u>4</u>            |
|                            | 2b | All items from the World Health Organization Trial Registration Data Set                                                                                                                                                                                                                 | <u>N/A</u>          |
| Protocol version           | 3  | Date and version identifier                                                                                                                                                                                                                                                              | <u>4</u>            |
| Funding                    | 4  | Sources and types of financial, material, and other support                                                                                                                                                                                                                              | <u>12</u>           |
| Roles and responsibilities | 5a | Names, affiliations, and roles of protocol contributors                                                                                                                                                                                                                                  | <u>1, 2, 16, 17</u> |
|                            | 5b | Name and contact information for the trial sponsor                                                                                                                                                                                                                                       | <u>N/A</u>          |
|                            | 5c | Role of study sponsor and funders, if any, in study design; collection, management, analysis, and interpretation of data; writing of the report; and the decision to submit the report for publication, including whether they will have ultimate authority over any of these activities | <u>16</u>           |
|                            | 5d | Composition, roles, and responsibilities of the coordinating centre, steering committee, endpoint adjudication committee, data management team, and other individuals or groups overseeing the trial, if applicable (see Item 21a for data monitoring committee)                         | <u>N/A</u>          |

1  
2  
3  
4  
5  
6  
7  
8  
9  
10  
11  
12  
13  
14  
15  
16  
17  
18  
19  
20  
21  
22  
23  
24  
25  
26  
27  
28  
29  
30  
31  
32  
33  
34  
35  
36  
37  
38  
39  
40  
41  
42  
43  
44  
45  
46  
47  
48  
49  
50  
51  
52  
53  
54  
55  
56  
57  
58  
59  
60

1  
2  
3  
4  
5  
6  
7  
8  
9  
10  
11  
12  
13  
14  
15  
16  
17  
18  
19  
20  
21  
22  
23  
24  
25  
26  
27  
28  
29  
30  
31  
32  
33  
34  
35  
36  
37  
38  
39  
40  
41  
42  
43  
44  
45  
46  
47  
48  
49  
50  
51  
52  
53  
54  
55  
56  
57  
58  
59  
60

**Introduction**

|                          |    |                                                                                                                                                                                                           |                |
|--------------------------|----|-----------------------------------------------------------------------------------------------------------------------------------------------------------------------------------------------------------|----------------|
| Background and rationale | 6a | Description of research question and justification for undertaking the trial, including summary of relevant studies (published and unpublished) examining benefits and harms for each intervention        | <u>5, 6, 7</u> |
|                          | 6b | Explanation for choice of comparators                                                                                                                                                                     | <u>6, 7, 8</u> |
| Objectives               | 7  | Specific objectives or hypotheses                                                                                                                                                                         | <u>8</u>       |
| Trial design             | 8  | Description of trial design including type of trial (eg, parallel group, crossover, factorial, single group), allocation ratio, and framework (eg, superiority, equivalence, noninferiority, exploratory) | <u>8</u>       |

**Methods: Participants, interventions, and outcomes**

|                      |     |                                                                                                                                                                                                                                                                                                                                                                                |              |
|----------------------|-----|--------------------------------------------------------------------------------------------------------------------------------------------------------------------------------------------------------------------------------------------------------------------------------------------------------------------------------------------------------------------------------|--------------|
| Study setting        | 9   | Description of study settings (eg, community clinic, academic hospital) and list of countries where data will be collected. Reference to where list of study sites can be obtained                                                                                                                                                                                             | <u>8</u>     |
| Eligibility criteria | 10  | Inclusion and exclusion criteria for participants. If applicable, eligibility criteria for study centres and individuals who will perform the interventions (eg, surgeons, psychotherapists)                                                                                                                                                                                   | <u>9, 10</u> |
| Interventions        | 11a | Interventions for each group with sufficient detail to allow replication, including how and when they will be administered                                                                                                                                                                                                                                                     | <u>8, 9</u>  |
|                      | 11b | Criteria for discontinuing or modifying allocated interventions for a given trial participant (eg, drug dose change in response to harms, participant request, or improving/worsening disease)                                                                                                                                                                                 | <u>8-10</u>  |
|                      | 11c | Strategies to improve adherence to intervention protocols, and any procedures for monitoring adherence (eg, drug tablet return, laboratory tests)                                                                                                                                                                                                                              | <u>10</u>    |
|                      | 11d | Relevant concomitant care and interventions that are permitted or prohibited during the trial                                                                                                                                                                                                                                                                                  | <u>10</u>    |
| Outcomes             | 12  | Primary, secondary, and other outcomes, including the specific measurement variable (eg, systolic blood pressure), analysis metric (eg, change from baseline, final value, time to event), method of aggregation (eg, median, proportion), and time point for each outcome. Explanation of the clinical relevance of chosen efficacy and harm outcomes is strongly recommended | <u>11</u>    |
| Participant timeline | 13  | Time schedule of enrolment, interventions (including any run-ins and washouts), assessments, and visits for participants. A schematic diagram is highly recommended (see Figure)                                                                                                                                                                                               | <u>13</u>    |

1  
2  
3  
4  
5  
6  
7  
8  
9  
10  
11  
12  
13  
14  
15  
16  
17  
18  
19  
20  
21  
22  
23  
24  
25  
26  
27  
28  
29  
30  
31  
32  
33  
34  
35  
36  
37  
38  
39  
40  
41  
42  
43  
44  
45  
46  
47  
48  
49  
50  
51  
52  
53  
54  
55  
56  
57  
58  
59  
60

|                                                                     |     |                                                                                                                                                                                                                                                                                                                                                                                                              |               |
|---------------------------------------------------------------------|-----|--------------------------------------------------------------------------------------------------------------------------------------------------------------------------------------------------------------------------------------------------------------------------------------------------------------------------------------------------------------------------------------------------------------|---------------|
| Sample size                                                         | 14  | Estimated number of participants needed to achieve study objectives and how it was determined, including clinical and statistical assumptions supporting any sample size calculations                                                                                                                                                                                                                        | <u>12, 13</u> |
| Recruitment                                                         | 15  | Strategies for achieving adequate participant enrolment to reach target sample size                                                                                                                                                                                                                                                                                                                          | <u>12, 13</u> |
| <b>Methods: Assignment of interventions (for controlled trials)</b> |     |                                                                                                                                                                                                                                                                                                                                                                                                              |               |
| Allocation:                                                         |     |                                                                                                                                                                                                                                                                                                                                                                                                              |               |
| Sequence generation                                                 | 16a | Method of generating the allocation sequence (eg, computer-generated random numbers), and list of any factors for stratification. To reduce predictability of a random sequence, details of any planned restriction (eg, blocking) should be provided in a separate document that is unavailable to those who enrol participants or assign interventions                                                     | <u>12</u>     |
| Allocation concealment mechanism                                    | 16b | Mechanism of implementing the allocation sequence (eg, central telephone; sequentially numbered, opaque, sealed envelopes), describing any steps to conceal the sequence until interventions are assigned                                                                                                                                                                                                    | <u>15</u>     |
| Implementation                                                      | 16c | Who will generate the allocation sequence, who will enrol participants, and who will assign participants to interventions                                                                                                                                                                                                                                                                                    | <u>15</u>     |
| Blinding (masking)                                                  | 17a | Who will be blinded after assignment to interventions (eg, trial participants, care providers, outcome assessors, data analysts), and how                                                                                                                                                                                                                                                                    | <u>N/A</u>    |
|                                                                     | 17b | If blinded, circumstances under which unblinding is permissible, and procedure for revealing a participant's allocated intervention during the trial                                                                                                                                                                                                                                                         | <u>N/A</u>    |
| <b>Methods: Data collection, management, and analysis</b>           |     |                                                                                                                                                                                                                                                                                                                                                                                                              |               |
| Data collection methods                                             | 18a | Plans for assessment and collection of outcome, baseline, and other trial data, including any related processes to promote data quality (eg, duplicate measurements, training of assessors) and a description of study instruments (eg, questionnaires, laboratory tests) along with their reliability and validity, if known. Reference to where data collection forms can be found, if not in the protocol | <u>10, 11</u> |
|                                                                     | 18b | Plans to promote participant retention and complete follow-up, including list of any outcome data to be collected for participants who discontinue or deviate from intervention protocols                                                                                                                                                                                                                    | <u>10, 11</u> |

|                                 |     |                                                                                                                                                                                                                                                                                                                                       |               |
|---------------------------------|-----|---------------------------------------------------------------------------------------------------------------------------------------------------------------------------------------------------------------------------------------------------------------------------------------------------------------------------------------|---------------|
| Data management                 | 19  | Plans for data entry, coding, security, and storage, including any related processes to promote data quality (eg, double data entry, range checks for data values). Reference to where details of data management procedures can be found, if not in the protocol                                                                     | <u>15</u>     |
| Statistical methods             | 20a | Statistical methods for analysing primary and secondary outcomes. Reference to where other details of the statistical analysis plan can be found, if not in the protocol                                                                                                                                                              | <u>12, 13</u> |
|                                 | 20b | Methods for any additional analyses (eg, subgroup and adjusted analyses)                                                                                                                                                                                                                                                              | <u>12, 13</u> |
|                                 | 20c | Definition of analysis population relating to protocol non-adherence (eg, as randomised analysis), and any statistical methods to handle missing data (eg, multiple imputation)                                                                                                                                                       | <u>10, 13</u> |
| <b>Methods: Monitoring</b>      |     |                                                                                                                                                                                                                                                                                                                                       |               |
| Data monitoring                 | 21a | Composition of data monitoring committee (DMC); summary of its role and reporting structure; statement of whether it is independent from the sponsor and competing interests; and reference to where further details about its charter can be found, if not in the protocol. Alternatively, an explanation of why a DMC is not needed | <u>N/A</u>    |
|                                 | 21b | Description of any interim analyses and stopping guidelines, including who will have access to these interim results and make the final decision to terminate the trial                                                                                                                                                               | <u>13</u>     |
| Harms                           | 22  | Plans for collecting, assessing, reporting, and managing solicited and spontaneously reported adverse events and other unintended effects of trial interventions or trial conduct                                                                                                                                                     | <u>N/A</u>    |
| Auditing                        | 23  | Frequency and procedures for auditing trial conduct, if any, and whether the process will be independent from investigators and the sponsor                                                                                                                                                                                           | <u>N/A</u>    |
| <b>Ethics and dissemination</b> |     |                                                                                                                                                                                                                                                                                                                                       |               |
| Research ethics approval        | 24  | Plans for seeking research ethics committee/institutional review board (REC/IRB) approval                                                                                                                                                                                                                                             | <u>N6</u>     |
| Protocol amendments             | 25  | Plans for communicating important protocol modifications (eg, changes to eligibility criteria, outcomes, analyses) to relevant parties (eg, investigators, REC/IRBs, trial participants, trial registries, journals, regulators)                                                                                                      | <u>N/A</u>    |

1  
2  
3  
4  
5  
6  
7  
8  
9  
10  
11  
12  
13  
14  
15  
16  
17  
18  
19  
20  
21  
22  
23  
24  
25  
26  
27  
28  
29  
30  
31  
32  
33  
34  
35  
36  
37  
38  
39  
40  
41  
42  
43  
44  
45  
46  
47  
48  
49  
50  
51  
52  
53  
54  
55  
56  
57  
58  
59  
60

|                               |     |                                                                                                                                                                                                                                                                                     |              |
|-------------------------------|-----|-------------------------------------------------------------------------------------------------------------------------------------------------------------------------------------------------------------------------------------------------------------------------------------|--------------|
| Consent or assent             | 26a | Who will obtain informed consent or assent from potential trial participants or authorised surrogates, and how (see Item 32)                                                                                                                                                        | 9            |
|                               | 26b | Additional consent provisions for collection and use of participant data and biological specimens in ancillary studies, if applicable                                                                                                                                               | 11           |
| Confidentiality               | 27  | How personal information about potential and enrolled participants will be collected, shared, and maintained in order to protect confidentiality before, during, and after the trial                                                                                                | 15           |
| Declaration of interests      | 28  | Financial and other competing interests for principal investigators for the overall trial and each study site                                                                                                                                                                       | 17           |
| Access to data                | 29  | Statement of who will have access to the final trial dataset, and disclosure of contractual agreements that limit such access for investigators                                                                                                                                     | 17           |
| Ancillary and post-trial care | 30  | Provisions, if any, for ancillary and post-trial care, and for compensation to those who suffer harm from trial participation                                                                                                                                                       | N/A          |
| Dissemination policy          | 31a | Plans for investigators and sponsor to communicate trial results to participants, healthcare professionals, the public, and other relevant groups (eg, via publication, reporting in results databases, or other data sharing arrangements), including any publication restrictions | 16           |
|                               | 31b | Authorship eligibility guidelines and any intended use of professional writers                                                                                                                                                                                                      | N/A          |
|                               | 31c | Plans, if any, for granting public access to the full protocol, participant-level dataset, and statistical code                                                                                                                                                                     | N/A          |
| <b>Appendices</b>             |     |                                                                                                                                                                                                                                                                                     |              |
| Informed consent materials    | 32  | Model consent form and other related documentation given to participants and authorised surrogates                                                                                                                                                                                  | see protocol |
| Biological specimens          | 33  | Plans for collection, laboratory evaluation, and storage of biological specimens for genetic or molecular analysis in the current trial and for future use in ancillary studies, if applicable                                                                                      | see protocol |

\*It is strongly recommended that this checklist be read in conjunction with the SPIRIT 2013 Explanation & Elaboration for important clarification on the items. Amendments to the protocol should be tracked and dated. The SPIRIT checklist is copyrighted by the SPIRIT Group under the Creative Commons Attribution-NonCommercial-NoDerivs 3.0 Unported license.

1  
2  
3  
4  
5  
6  
7  
8  
9  
10  
11  
12  
13  
14  
15  
16  
17  
18  
19  
20  
21  
22  
23  
24  
25  
26  
27  
28  
29  
30  
31  
32  
33  
34  
35  
36  
37  
38  
39  
40  
41  
42  
43  
44  
45  
46  
47  
48  
49  
50  
51  
52  
53  
54  
55  
56  
57  
58  
59  
60
