# Supplementary material for: Randomised phase II trial of CAPTEM or FOLFIRI as SEcond-line therapy in NEuroendocrine CArcinomas and exploratory analysis of predictive role of PET/CT imaging and biological markers (SENECA trial): a study protocol
Source: PubMed Central journal article supplement — BMJ Open. 2020 Jul 19;10(7):e034393. doi: 10.1136/bmjopen-2019-034393 (PMC7371236; doi:10.1136/bmjopen-2019-034393), 2020-07-19
Supplement: bmjopen-2019-034393supp001.pdf [file bmjopen-2019-034393supp001.pdf]

**Supplementary Table 1.** List of Ethical committee of Italian Centers with the ID approval number involved in SENECA trial

| <b>Center Ethical Committee</b>                                                         | <b>Approval ID number</b> |
|-----------------------------------------------------------------------------------------|---------------------------|
| Comitato Etico della Romagna CEROM                                                      | 1660                      |
| Comitato Etico di INT - Milano                                                          | 146/16                    |
| Comitato etico per la sperimentazione clinica - Comprensorio di Bolzano                 | 8-2017                    |
| Comitato Etico dell'Area Vasta Emilia Nord                                              | 220/16                    |
| Comitato Etico Area Vasta Nord Ovest- Pisa                                              | 1220/2016                 |
| Comitato Etico IRCCS "De Bellis" - Castellana Grotte                                    | 34/CE De Bellis           |
| Comitato Etico dell'Area Vasta Emilia Nord                                              | 24-2017                   |
| Istituto Oncologico Veneto - Padova                                                     | 2016/63                   |
| Comitato Etico ASL - Lecce                                                              | 140686                    |
| Comitato Etico di Area Vasta Emilia Centro (CE-AVEC)                                    | 32/2017/O/Sper            |
| Comitato Etico Regionale Marche di AOU - Ospedali Riuniti di Ancona                     | 2017 0068 OR              |
| Comitato Etico dell'Università Campus Bio-Medico di Roma                                | 02.17                     |
| Comitato Etico per la Pratica Clinica dell'ULSS 1 Dolomiti,                             | 399/CE Dolomiti           |
| Comitato Etico Istituto Tumori - Bari                                                   | 621/CE                    |
| Comitato Etico Interregionale - Bari                                                    | 5165                      |
| Comitato Etico Palermo 1                                                                | 02/2018                   |
| Comitato Etico Unico Regionale (C.E.U.R.)                                               | Ceur-2018-Sper-076-CRO    |
| Comitato etico per la Sperimentazione Clinica (CESC) delle Province di Verona e Rovigo  | 2350CESC                  |
| Comitato Etico degli IRCCS Istituto Europeo di Oncologia e Centro Cardiologico Monzino. | IEO 1133 - RE2189/NC      |
| Comitato Etico Interaziendale A.O.U. San Luigi Gonzaga                                  | 192/2019                  |
| Comitato Etico di Brescia                                                               | 3729                      |
| Comitato Etico Area Vasta Centro - AOU Careggi                                          | 12447_spe                 |
